# Supplementary material for: Effects of physical activity on anxiety levels in college students: mediating role of emotion regulation
Source: PeerJ. 2024 Sep 18;12:e17961. doi: 10.7717/peerj.17961 (PMC11416097; doi:10.7717/peerj.17961)
Supplement: Supplemental Information 1 [file peerj-12-17961-s001.xlsx]

## Sheet: Sheet1
Gender	Grade	address	PE	TPE	FPE	PEI	SAS	SAS1	SAS2	SAS3	SAS4	SAS5	SAS6	SAS7	SAS8	SAS9	SAS10	SAS11	SAS12	SAS13	SAS14	SAS15	SAS16	SAS17	SAS18	SAS19	SAS20	ER	CR	EI	CR1	EI1	CR2	EI2	CR3	EI3	CR4	CR5	EI4	CR6
1	2	1	12	4	2	2	56	2	2	2	2	3	2	2	2	3	2	2	2	3	2	2	2	3	2	3	2	50	30	20	5	5	5	5	5	5	5	5	5	5
1	2	2	18	4	3	2	58	3	3	2	2	2	3	2	2	2	3	2	2	2	3	3	2	2	2	2	2	45	29	16	6	5	5	3	6	4	4	4	4	4
1	2	2	24	4	4	2	39	1	1	1	1	1	1	1	2	2	2	2	1	4	1	1	1	3	2	2	1	42	28	14	5	3	5	3	5	4	5	5	4	3
1	1	1	48	5	3	4	41	2	1	2	1	2	1	1	3	2	2	1	1	2	1	1	1	4	1	2	2	54	36	18	6	3	6	5	6	5	6	6	5	6
1	1	1	18	4	3	2	41	1	1	1	1	3	1	1	2	3	2	1	1	3	1	2	1	3	1	2	2	51	42	9	7	1	7	1	7	6	7	7	1	7
1	1	1	12	3	3	2	36	2	1	1	1	2	1	2	1	2	1	1	1	1	1	1	1	3	2	3	1	34	16	18	2	4	4	2	2	6	3	3	6	2
1	1	1	80	5	5	4	69	3	3	3	3	2	3	3	3	2	3	3	3	2	3	3	3	2	3	2	3	49	29	20	4	4	6	6	4	5	5	5	5	5
1	1	1	80	5	5	4	28	1	1	1	1	2	1	1	1	1	1	1	1	1	1	1	2	1	1	1	1	63	37	26	7	7	7	7	5	7	7	5	5	6
1	1	1	8	2	4	2	43	2	1	1	1	3	1	1	2	3	2	1	1	2	1	2	1	4	1	3	1	56	36	20	6	5	6	5	6	5	6	6	5	6
1	1	1	60	5	5	3	31	1	1	1	1	2	1	1	2	1	1	1	1	1	2	1	1	3	1	1	1	67	42	25	7	7	7	4	7	7	7	7	7	7
1	1	1	60	5	5	3	33	2	2	2	1	1	1	1	1	2	2	1	1	1	1	1	1	1	2	1	1	48	32	16	5	6	5	3	5	3	6	6	4	5
1	1	1	24	3	3	4	40	2	2	2	1	2	2	1	1	2	1	1	1	2	1	1	1	3	2	2	2	59	35	24	5	6	6	6	6	6	6	6	6	6
1	2	1	18	4	3	2	44	1	1	1	1	4	1	1	1	4	1	1	1	4	1	1	1	4	1	4	1	40	24	16	4	4	4	4	4	4	4	4	4	4
1	2	1	0	1	3	1	44	1	1	1	1	4	1	1	1	4	1	1	1	4	1	1	1	4	1	4	1	49	29	20	3	5	3	3	6	6	6	6	6	5
1	2	1	12	5	3	1	61	2	3	2	3	3	3	2	3	2	2	3	2	2	3	2	2	3	2	2	3	39	26	13	4	3	4	4	4	3	5	4	3	5
1	2	1	27	4	3	3	51	2	2	3	1	1	2	2	2	4	2	2	2	2	1	1	1	3	2	4	2	64	38	26	7	7	7	7	6	6	6	6	6	6
1	2	1	48	5	3	4	56	2	2	2	2	3	2	2	2	3	2	2	2	3	2	2	2	3	2	3	2	40	24	16	4	4	4	4	4	4	4	4	4	4
1	2	1	18	3	3	3	58	2	2	2	2	3	3	2	2	3	2	2	2	3	2	2	2	3	2	3	2	20	12	8	2	2	2	2	2	2	2	2	2	2
1	2	1	24	4	4	2	63	4	2	4	1	2	2	1	4	4	3	1	1	3	1	4	2	4	2	4	1	60	35	25	7	7	3	7	7	7	7	6	4	5
1	2	1	6	2	3	2	55	2	2	2	2	3	2	2	2	3	2	2	2	3	2	2	2	3	2	2	2	50	30	20	5	5	5	5	5	5	5	5	5	5
1	2	1	36	5	3	3	56	2	2	2	2	3	2	2	2	3	2	2	2	3	2	2	2	3	2	3	2	40	24	16	4	4	4	4	4	4	4	4	4	4
1	2	1	6	3	3	1	49	1	1	1	1	2	1	1	2	3	2	2	2	2	2	3	2	4	2	3	2	42	29	13	5	3	5	3	5	3	5	4	4	5
1	2	1	12	4	2	2	59	2	3	2	2	3	2	3	2	3	2	2	2	3	2	2	1	3	2	4	2	70	42	28	7	7	7	7	7	7	7	7	7	7
1	2	1	36	4	4	3	58	2	3	2	2	3	2	2	3	3	1	2	2	3	2	2	1	3	3	3	2	32	20	12	3	3	4	2	4	3	2	3	4	4
1	2	1	27	4	3	3	56	2	2	2	2	3	2	2	2	3	2	2	2	3	2	2	2	3	2	3	2	39	23	16	3	4	4	4	4	4	4	4	4	4
1	2	1	24	5	3	2	60	3	2	3	2	2	3	3	2	2	2	3	2	2	2	3	3	2	2	2	3	50	30	20	5	5	5	5	5	5	5	5	5	5
1	2	1	64	5	4	4	38	1	1	2	1	3	1	2	1	3	1	1	1	1	1	2	1	3	1	2	1	38	28	10	4	2	5	2	5	4	5	5	2	4
1	2	1	3	2	3	1	34	1	1	1	1	2	1	2	1	2	1	1	1	1	1	1	2	3	2	1	1	47	35	12	5	3	6	3	6	2	6	6	4	6
1	2	1	24	3	4	3	31	1	1	1	1	2	1	1	1	1	1	1	1	1	1	1	3	1	1	3	1	45	27	18	4	5	4	1	7	6	4	4	6	4
1	2	1	12	4	2	2	39	2	1	2	1	3	1	1	1	2	2	2	1	2	1	1	1	2	2	2	1	40	26	14	4	5	4	3	5	3	5	4	3	4
1	2	1	18	3	3	3	38	1	1	1	1	2	1	1	1	3	1	1	1	4	1	1	1	4	1	2	1	20	12	8	2	2	2	2	2	2	2	2	2	2
1	2	1	80	5	5	4	56	2	2	2	2	3	2	2	2	3	2	2	2	3	2	2	2	3	2	3	2	40	24	16	4	4	4	4	4	4	4	4	4	4
1	2	1	32	5	2	4	44	1	1	2	1	3	1	2	1	3	1	1	1	3	1	1	3	3	1	3	2	41	25	16	5	4	4	4	4	4	4	4	4	4
1	2	1	27	4	3	3	35	1	1	1	1	3	1	1	1	3	1	1	1	2	1	1	1	2	1	3	1	58	36	22	6	6	6	6	6	3	6	6	7	6
1	2	1	12	5	3	1	44	1	1	1	1	4	1	1	1	4	1	1	1	4	1	1	1	4	1	4	1	70	42	28	7	7	7	7	7	7	7	7	7	7
1	3	1	4	2	4	1	33	1	1	1	1	2	1	1	2	4	1	1	1	1	1	1	1	1	1	2	1	49	35	14	6	6	6	2	6	3	6	5	3	6
1	3	1	6	3	3	1	39	1	1	2	1	3	1	1	2	1	2	1	1	2	1	2	1	2	1	3	2	52	29	23	5	6	4	5	6	6	5	5	6	4
1	3	1	36	4	4	3	69	3	3	3	3	2	3	3	3	2	3	3	3	2	3	3	3	2	3	2	3	49	31	18	6	3	5	5	5	5	5	5	5	5
1	3	1	4	2	4	1	64	4	3	3	3	2	3	3	2	2	3	2	2	2	3	2	2	2	3	3	2	51	31	20	5	5	6	5	5	5	5	5	5	5
1	4	1	0	1	1	1	39	2	1	2	1	2	1	1	2	2	2	1	1	4	1	1	1	2	1	2	1	57	34	23	4	5	6	6	6	6	6	6	6	6
1	4	1	48	5	3	4	40	2	2	2	2	3	2	2	2	1	1	1	1	1	1	1	2	1	1	3	1	70	42	28	7	7	7	7	7	7	7	7	7	7
1	1	2	36	5	3	3	34	1	1	1	1	2	1	1	1	2	1	1	1	2	1	1	3	2	1	2	1	46	30	16	5	5	5	5	5	5	5	5	1	5
1	1	2	6	2	3	2	39	1	1	1	1	4	1	1	1	2	1	3	1	2	1	1	1	4	1	2	1	48	32	16	6	3	6	5	5	3	5	5	5	5
1	1	2	12	3	3	2	31	1	1	1	1	2	1	1	1	2	1	1	1	2	1	1	1	2	1	2	1	24	13	11	2	2	2	3	2	2	1	2	4	4
1	1	2	5	2	5	1	45	3	1	1	1	2	1	1	2	4	2	2	2	1	1	4	2	3	1	1	1	45	32	13	6	6	3	4	6	2	6	6	1	5
1	1	2	48	5	3	4	41	1	1	1	1	4	1	1	1	2	1	1	1	4	1	3	1	4	1	2	1	59	36	23	7	7	7	7	7	4	4	7	5	4
1	2	2	36	4	3	4	49	2	2	2	2	4	1	1	1	4	1	1	1	4	1	1	1	3	2	3	2	40	24	16	4	4	4	4	4	4	4	4	4	4
1	2	2	9	4	3	1	69	3	3	3	3	2	3	3	3	2	3	3	3	2	3	3	3	2	3	2	3	52	32	20	7	5	5	5	5	5	5	5	5	5
1	2	2	48	5	3	4	40	1	1	1	1	4	1	1	1	4	1	1	1	4	1	1	1	2	2	2	1	40	24	16	4	4	4	4	4	4	4	4	4	4
1	2	2	32	5	2	4	56	2	2	2	2	3	2	2	2	3	2	2	2	3	2	2	2	3	2	3	2	30	18	12	3	3	3	3	3	3	3	3	3	3
1	2	2	0	1	1	1	56	2	2	2	2	3	2	2	2	3	2	2	2	3	2	2	2	3	2	3	2	41	25	16	5	4	4	4	4	4	4	4	4	4
1	2	2	100	5	5	5	33	1	1	1	1	4	1	1	1	1	1	1	1	1	1	1	2	1	1	2	2	54	36	18	6	5	7	6	6	4	6	6	3	5
1	2	2	0	5	-2	3	56	2	2	2	2	3	2	2	2	3	2	2	2	3	2	2	2	3	2	3	2	60	36	24	6	6	6	6	6	6	6	6	6	6
1	2	2	3	2	3	1	56	2	2	2	2	3	2	2	2	3	2	2	2	3	2	2	2	3	2	3	2	50	30	20	5	5	5	5	5	5	5	5	5	5
1	2	2	30	3	5	3	38	1	1	1	1	1	1	1	1	1	1	1	1	4	1	1	2	4	1	4	1	70	42	28	7	7	7	7	7	7	7	7	7	7
1	2	2	48	4	4	4	33	1	1	1	1	1	1	1	1	1	1	1	1	4	1	1	1	4	1	1	1	46	40	6	6	2	6	2	7	1	7	7	1	7
1	2	2	0	1	1	1	44	1	1	1	1	4	1	1	1	4	1	1	1	4	1	1	1	4	1	4	1	70	42	28	7	7	7	7	7	7	7	7	7	7
1	2	2	60	5	3	5	38	2	1	2	1	2	1	1	1	3	1	1	1	1	1	2	3	2	1	1	2	45	33	12	5	5	5	5	7	1	6	6	1	4
1	2	2	4	3	2	1	40	2	2	1	1	1	1	1	2	1	1	1	1	1	1	2	4	3	2	3	1	31	18	13	1	4	1	1	4	4	4	4	4	4
1	2	2	48	5	3	4	36	2	1	1	1	3	1	1	1	2	1	1	1	2	1	1	1	4	1	2	1	50	30	20	5	5	5	5	5	5	5	5	5	5
1	2	2	32	5	4	2	43	2	1	1	1	2	1	3	1	4	2	1	1	4	1	1	1	4	1	1	1	47	30	17	4	3	2	2	6	6	6	6	6	6
1	2	2	30	3	5	3	40	1	2	1	2	3	1	1	2	2	1	1	1	3	1	1	1	3	1	3	1	61	39	22	7	6	7	5	7	6	6	5	5	7
1	2	2	48	5	3	4	39	1	1	1	1	2	1	2	2	3	1	1	1	3	1	1	1	4	1	2	1	43	30	13	5	3	5	4	5	3	5	5	3	5
1	2	2	80	5	5	4	34	2	1	1	1	2	1	1	1	3	1	1	1	1	1	1	1	2	2	2	1	40	26	14	4	4	5	3	5	3	4	4	4	4
1	2	2	6	3	3	1	31	1	1	1	1	1	1	1	1	2	1	1	1	1	1	1	1	3	2	2	1	30	26	4	5	1	1	1	5	1	5	5	1	5
1	2	2	24	3	3	4	34	1	1	1	1	3	1	2	2	1	2	2	1	2	1	1	1	1	1	1	1	40	24	16	4	4	4	4	4	4	4	4	4	4
1	2	2	32	5	4	2	39	1	1	1	1	3	1	1	1	3	1	1	1	2	1	1	2	3	2	2	2	49	30	19	5	5	5	5	5	5	5	5	4	5
1	2	2	6	3	3	1	49	1	2	1	2	4	2	1	2	4	2	1	2	3	1	2	1	3	1	2	2	49	30	19	5	5	5	4	5	5	5	5	5	5
1	2	2	6	4	2	1	38	2	1	1	1	1	1	1	2	1	2	1	1	1	2	2	3	3	1	2	1	61	40	21	5	5	7	5	7	6	7	7	5	7
1	2	2	4	3	2	1	35	2	1	1	1	4	1	1	1	4	1	1	1	1	1	1	1	1	1	2	1	56	39	17	7	2	7	7	7	4	4	7	4	7
1	2	2	64	5	4	4	53	3	1	3	2	1	2	3	3	3	2	2	1	1	2	4	2	1	1	3	2	51	31	20	5	5	6	5	5	5	5	5	5	5
1	2	2	12	2	3	4	43	2	1	1	1	3	1	2	2	3	2	1	1	2	1	1	2	2	2	3	1	43	27	16	4	4	4	4	5	4	5	5	4	4
1	2	2	4	2	4	1	35	2	1	1	1	3	1	1	1	2	1	2	1	2	1	1	1	2	1	2	1	56	33	23	6	6	4	7	5	5	6	6	5	6
1	2	2	0	1	5	4	44	1	1	1	1	4	1	1	1	4	1	1	1	4	1	1	1	4	1	4	1	40	24	16	4	4	4	4	4	4	4	4	4	4
1	2	2	9	4	3	1	36	1	1	1	1	3	1	1	1	2	1	1	1	2	1	2	1	3	1	3	1	54	35	19	7	5	5	4	5	6	6	6	4	6
1	2	2	12	5	3	1	44	2	1	1	1	3	1	1	1	4	1	2	1	4	2	1	2	4	1	1	1	50	30	20	5	6	5	5	5	4	5	5	5	5
1	2	2	36	4	4	3	61	2	3	3	3	3	2	3	2	3	2	2	2	3	2	2	2	3	1	4	2	51	27	24	4	6	4	6	4	6	5	5	6	5
1	2	2	0	1	3	1	25	1	1	1	1	1	1	1	1	1	1	1	1	1	1	1	1	1	1	1	1	67	42	25	7	4	7	7	7	7	7	7	7	7
1	2	2	24	5	3	2	45	2	1	2	1	4	1	1	2	3	1	1	1	4	1	1	1	4	2	2	1	47	30	17	5	5	5	3	5	4	6	5	5	4
1	2	2	24	5	3	2	45	2	1	2	1	2	1	1	3	4	1	1	1	4	1	1	2	3	1	3	1	32	27	5	4	1	7	1	4	1	3	4	2	5
1	2	2	24	3	3	4	54	2	2	2	2	2	2	2	3	2	3	2	2	2	2	2	2	3	2	2	2	49	31	18	6	2	6	6	4	5	5	5	5	5
1	2	2	24	5	3	2	65	3	3	3	3	2	2	2	2	2	3	3	3	2	3	3	3	2	3	2	3	50	30	20	5	5	5	5	5	5	5	5	5	5
1	2	2	24	5	3	2	40	2	1	2	1	4	1	1	1	2	2	1	1	1	1	2	4	1	2	1	1	42	35	7	7	4	7	1	6	1	7	1	1	7
1	2	2	60	4	5	4	49	3	1	2	2	2	1	2	2	3	2	1	1	4	2	2	1	3	1	3	1	47	28	19	5	5	4	5	5	4	4	5	5	5
1	2	2	9	4	3	1	56	2	2	2	2	3	2	2	2	3	2	2	2	3	2	2	2	3	2	3	2	37	24	13	2	2	2	2	5	4	5	5	5	5
1	2	2	6	3	3	1	56	2	2	2	2	3	2	2	2	3	2	2	2	3	2	2	2	3	2	3	2	50	30	20	5	5	5	5	5	5	5	5	5	5
1	2	2	18	4	3	2	35	1	1	1	1	2	1	1	2	2	1	1	1	1	1	3	2	3	1	1	1	60	36	24	6	6	6	6	6	6	6	6	6	6
1	3	2	0	1	1	1	25	1	1	1	1	1	1	1	1	1	1	1	1	1	1	1	1	1	1	1	1	46	42	4	7	1	7	1	7	1	7	7	1	7
1	3	2	36	4	4	3	75	4	4	4	4	2	4	3	4	2	4	4	2	1	2	3	2	2	4	2	3	64	37	27	5	7	6	6	7	7	6	6	7	7
1	3	2	18	4	3	2	56	2	2	2	2	3	2	2	2	3	2	2	2	3	2	2	2	3	2	3	2	45	27	18	5	5	4	4	4	4	4	5	5	5
1	3	2	64	5	4	4	35	2	1	2	1	4	1	1	1	1	2	1	1	1	2	1	1	1	2	1	1	59	35	24	6	6	6	7	6	6	6	6	5	5
1	3	2	20	5	5	1	56	2	2	2	2	3	2	2	2	3	2	2	2	3	2	2	2	3	2	3	2	50	30	20	5	5	5	5	5	5	5	5	5	5
1	4	2	5	2	5	1	33	1	1	1	1	2	1	1	1	2	1	1	1	2	1	1	1	2	1	2	2	48	29	19	5	4	5	5	5	5	4	5	5	5
1	4	2	32	5	2	4	46	1	1	2	2	4	1	1	1	4	1	1	1	4	1	1	1	4	1	4	1	50	31	19	4	5	6	3	5	6	5	5	5	6
1	1	1	80	5	5	4	35	2	1	1	1	1	1	1	2	2	1	1	1	1	1	3	1	2	2	2	1	37	28	9	6	2	6	2	4	2	4	4	3	4
1	2	2	36	4	3	4	49	3	3	3	1	3	2	2	2	2	1	1	1	2	1	1	1	3	2	3	2	42	28	14	7	1	1	5	4	6	6	6	2	4
1	3	2	80	5	5	4	51	1	2	2	1	1	1	4	3	2	2	3	3	1	1	1	2	4	1	3	3	48	36	12	7	6	7	1	7	2	7	1	3	7
1	4	2	0	1	3	1	58	2	2	2	2	3	2	2	2	3	2	2	2	3	2	2	3	3	2	3	2	45	30	15	7	4	4	4	4	3	5	5	4	5
1	1	1	8	3	4	1	30	1	1	1	1	2	1	1	1	2	1	1	1	1	1	1	1	2	1	2	1	70	42	28	7	7	7	7	7	7	7	7	7	7
1	1	1	100	5	5	5	81	4	4	4	4	1	4	4	4	1	4	4	4	1	4	4	4	1	4	1	4	70	42	28	7	7	7	7	7	7	7	7	7	7
1	1	1	100	5	5	5	44	1	1	1	1	4	1	1	1	4	1	1	1	4	1	1	1	4	1	4	1	50	30	20	5	5	5	5	5	5	5	5	5	5
1	1	1	64	5	4	4	44	1	1	2	2	3	1	1	2	3	2	1	1	2	1	1	2	3	2	3	1	59	40	19	6	5	7	4	7	6	7	6	4	7
1	1	1	64	5	4	4	41	1	1	1	1	1	1	3	1	4	3	1	1	1	1	1	1	3	3	2	2	58	40	18	7	4	7	7	5	2	7	7	5	7
1	1	1	80	5	5	4	49	2	1	2	1	3	1	2	4	3	2	1	3	2	1	1	1	1	2	4	2	70	42	28	7	7	7	7	7	7	7	7	7	7
1	1	1	36	5	3	3	35	1	1	1	1	2	1	1	4	2	1	1	1	2	1	1	1	2	1	2	1	48	37	11	6	2	6	4	6	2	6	6	3	7
1	1	1	0	1	3	1	36	2	1	1	1	2	1	1	1	2	1	1	1	4	1	1	1	3	1	2	1	55	36	19	6	5	6	5	6	3	6	6	6	6
1	1	1	48	4	4	4	31	2	1	1	1	2	1	1	1	2	2	1	1	1	1	1	2	1	1	1	1	50	33	17	7	4	5	3	5	6	6	5	4	5
1	1	1	64	5	4	4	31	1	1	1	1	2	1	1	1	2	1	1	1	2	1	1	1	2	1	2	1	54	35	19	6	4	6	5	6	5	6	5	5	6
1	1	1	64	5	4	4	38	1	1	1	1	3	2	1	1	3	1	1	1	2	1	2	2	2	1	2	1	45	36	9	7	2	6	2	6	2	6	6	3	5
1	1	1	48	5	4	3	25	1	1	1	1	1	1	1	1	1	1	1	1	1	1	1	1	1	1	1	1	70	42	28	7	7	7	7	7	7	7	7	7	7
1	1	1	80	5	5	4	44	1	1	1	1	4	1	1	1	4	1	1	1	4	1	1	1	4	1	4	1	10	6	4	1	1	1	1	1	1	1	1	1	1
1	1	1	80	5	5	4	53	3	1	2	1	4	2	4	1	2	3	3	1	2	1	1	1	4	3	2	1	60	36	24	6	6	6	6	6	6	6	6	6	6
1	1	1	36	4	3	4	81	4	4	4	4	1	4	4	4	1	4	4	4	1	4	4	4	1	4	1	4	70	42	28	7	7	7	7	7	7	7	7	7	7
1	1	1	64	5	4	4	45	2	1	1	1	1	2	2	1	2	1	2	1	1	1	4	2	3	2	4	2	59	33	26	7	7	7	7	4	7	5	5	5	5
1	1	1	6	4	2	1	34	1	1	1	1	1	1	1	1	2	1	1	1	4	1	1	1	3	1	2	1	68	42	26	7	5	7	7	7	7	7	7	7	7
1	1	1	9	4	3	1	41	2	1	2	1	2	1	1	2	2	2	1	1	2	1	2	2	3	1	2	2	45	32	13	6	3	5	3	5	3	6	5	4	5
1	1	1	48	4	4	4	30	1	1	1	1	4	1	1	1	1	1	1	1	1	1	1	1	2	1	1	1	43	32	11	6	2	6	3	5	3	5	5	3	5
1	1	1	9	2	3	3	44	2	1	1	1	2	2	2	1	3	1	1	1	2	1	3	1	2	3	4	1	29	16	13	2	6	2	2	6	1	4	1	4	1
1	1	1	48	5	3	4	48	2	1	2	1	4	1	1	1	3	1	1	1	4	1	2	1	4	1	4	2	48	31	17	7	5	5	5	5	3	5	5	4	4
1	1	1	8	2	4	2	29	1	1	1	1	1	1	1	1	1	1	1	1	1	1	1	1	4	1	1	1	70	42	28	7	7	7	7	7	7	7	7	7	7
1	1	1	36	4	3	4	38	1	1	1	1	4	1	1	1	3	3	1	1	2	1	1	1	2	2	1	1	42	29	13	6	3	5	2	6	4	4	4	4	4
1	1	1	24	3	4	3	34	2	1	2	1	2	1	1	2	1	2	1	1	1	1	2	1	1	1	2	1	56	42	14	7	2	7	4	7	4	7	7	4	7
1	1	1	64	5	4	4	45	2	2	2	1	2	1	1	1	3	1	1	1	4	1	1	2	4	1	4	1	60	36	24	6	6	6	6	6	6	6	6	6	6
1	1	1	80	5	5	4	45	1	1	1	1	4	1	1	1	4	1	2	1	4	1	1	1	4	1	4	1	50	28	22	4	7	4	5	5	5	5	5	5	5
1	1	1	64	5	4	4	48	2	2	2	2	3	2	2	2	2	2	2	2	1	1	1	2	3	1	3	1	46	28	18	4	3	4	5	7	4	5	5	6	3
1	1	1	64	5	4	4	56	2	2	3	2	2	4	2	3	3	2	1	2	3	2	1	3	2	2	2	2	24	12	12	2	6	2	2	2	2	2	2	2	2
1	1	1	15	4	5	1	41	1	1	1	1	2	1	1	2	4	2	2	1	2	1	1	2	3	1	3	1	47	26	21	5	5	5	4	4	6	4	4	6	4
1	1	1	48	5	4	3	38	1	1	1	1	1	1	1	1	2	1	1	1	4	1	1	3	3	2	2	1	45	33	12	5	2	5	4	6	3	5	6	3	6
1	1	1	6	2	3	2	43	3	2	2	2	3	2	1	2	2	1	1	1	2	1	1	1	2	1	3	1	46	25	21	5	7	5	5	3	5	4	4	4	4
1	1	1	24	4	2	4	51	3	1	1	2	3	2	3	3	2	2	2	2	1	2	2	2	3	2	2	1	63	42	21	7	5	7	5	7	7	7	7	4	7
1	1	1	60	4	4	5	44	2	2	2	2	3	1	1	1	3	1	1	1	1	1	1	3	2	2	2	3	44	29	15	5	3	5	4	5	4	5	5	4	4
1	1	1	60	5	5	3	41	1	1	1	1	3	1	1	2	2	2	1	1	2	1	1	2	3	2	4	1	39	25	14	4	4	4	3	5	3	4	4	4	4
1	1	1	16	3	4	2	35	1	1	1	1	3	1	1	1	2	1	1	1	2	1	1	1	4	1	2	1	47	32	15	6	2	5	5	6	3	5	5	5	5
1	1	1	100	5	5	5	41	1	1	1	1	4	1	1	1	3	2	1	1	4	1	1	1	4	1	2	1	46	26	20	4	5	4	6	5	4	4	5	5	4
1	2	1	32	3	4	4	53	3	3	2	3	3	2	1	1	4	1	1	1	4	1	1	1	4	1	4	1	38	23	15	5	4	4	4	4	3	4	3	4	3
1	2	1	64	5	4	4	45	2	1	1	1	4	1	1	1	4	1	1	1	4	1	1	1	4	1	4	1	41	24	17	4	4	4	5	4	4	4	4	4	4
1	2	1	60	4	5	4	34	1	1	2	2	2	1	1	1	3	1	1	1	1	1	1	1	2	1	2	1	43	37	6	7	2	7	1	6	2	5	5	1	7
1	2	1	100	5	5	5	28	1	1	1	1	2	1	1	1	1	1	1	1	1	1	1	1	1	1	1	2	53	36	17	7	1	7	7	7	3	5	5	6	5
1	2	1	60	5	5	3	50	1	1	1	1	2	3	2	1	2	3	1	3	3	2	2	2	3	2	3	2	60	36	24	6	6	6	6	6	6	6	6	6	6
1	2	1	80	5	4	5	48	2	1	2	1	3	2	2	2	3	2	2	1	2	1	1	2	2	3	3	1	51	30	21	4	5	5	5	5	5	5	5	6	6
1	2	1	36	4	3	4	59	2	2	3	2	2	3	2	3	2	2	3	4	2	2	3	2	2	2	2	2	37	23	14	3	4	3	4	3	3	4	5	3	5
1	2	1	64	5	4	4	35	2	2	1	1	3	1	1	1	2	1	1	1	2	1	1	1	2	1	2	1	41	26	15	4	4	5	3	5	5	3	5	3	4
1	2	1	64	5	4	4	44	1	1	1	1	4	1	1	1	4	1	1	1	4	1	1	1	4	1	4	1	60	36	24	6	6	6	6	6	6	6	6	6	6
1	2	1	2	2	2	1	56	2	2	2	2	3	2	2	2	3	2	2	2	3	2	2	2	3	2	3	2	40	24	16	4	4	4	4	4	4	4	4	4	4
1	2	1	80	5	5	4	33	1	1	2	2	2	1	1	1	3	1	1	1	1	1	1	1	1	1	2	1	39	29	10	6	2	5	3	5	2	5	3	3	5
1	2	1	24	3	3	4	44	2	2	1	1	3	2	1	2	3	1	1	1	2	3	1	1	2	1	4	1	42	27	15	5	5	5	2	5	4	4	4	4	4
1	2	1	40	5	5	2	54	3	3	2	3	2	2	3	2	2	2	1	1	4	1	1	1	4	1	4	1	53	35	18	5	2	6	5	6	6	6	6	5	6
1	2	1	48	5	3	4	46	2	2	2	2	3	1	1	1	4	1	1	1	4	1	1	1	4	1	3	1	42	28	14	5	4	4	4	5	4	5	5	2	4
1	2	1	48	5	3	4	44	2	2	2	1	3	1	1	1	3	1	1	1	4	1	1	1	4	1	3	1	48	29	19	5	5	5	5	5	4	5	4	5	5
1	2	1	8	2	4	2	36	1	1	1	1	1	1	1	1	2	1	1	1	4	1	1	2	2	1	3	2	52	38	14	4	3	7	5	7	3	7	6	3	7
1	2	1	24	5	3	2	44	1	1	1	1	4	1	2	2	3	2	2	2	2	1	1	1	2	2	2	2	50	30	20	5	5	5	5	5	5	5	5	5	5
1	2	1	24	5	3	2	38	1	1	1	1	2	1	1	1	3	1	1	1	4	1	1	1	4	1	2	1	43	27	16	5	3	5	5	4	4	5	4	4	4
1	2	1	6	3	3	1	49	2	2	2	1	3	2	2	2	1	2	1	2	2	1	3	1	3	2	3	2	60	36	24	6	6	6	6	6	6	6	6	6	6
1	2	1	3	2	3	1	30	1	1	1	1	1	1	1	1	3	1	1	1	1	1	1	1	1	1	3	1	38	25	13	4	3	5	4	5	2	3	4	4	4
1	2	1	48	5	4	3	44	1	1	1	1	4	1	1	1	4	1	1	1	4	1	1	1	4	1	4	1	40	24	16	4	4	4	4	4	4	4	4	4	4
1	2	1	36	4	4	3	33	1	1	1	1	1	2	1	2	2	1	1	1	1	1	1	1	4	1	1	1	60	42	18	7	4	7	2	7	7	7	7	5	7
1	2	1	8	5	2	1	28	1	1	1	1	1	1	1	1	1	1	1	1	1	1	1	1	1	1	2	2	55	35	20	7	4	4	4	7	7	7	5	5	5
1	2	1	18	4	3	2	55	1	2	2	2	3	2	2	2	3	2	2	2	3	2	2	2	3	2	3	2	20	12	8	2	2	2	2	2	2	2	2	2	2
1	2	1	64	5	4	4	56	2	2	2	2	3	2	2	2	3	2	2	2	3	2	2	2	3	2	3	2	46	28	18	7	4	5	6	4	4	4	4	4	4
1	2	1	64	5	4	4	41	2	1	2	1	3	1	1	1	3	1	1	1	2	1	1	1	4	1	4	1	44	25	19	4	5	3	4	4	5	5	5	5	4
1	2	1	45	4	5	3	28	1	1	1	1	1	1	1	1	2	1	1	1	1	1	1	1	2	1	1	1	60	36	24	6	6	6	6	6	6	6	6	6	6
1	2	1	30	3	5	3	35	1	1	1	1	2	1	2	1	3	1	1	1	3	1	1	1	2	1	2	1	44	29	15	5	4	5	4	5	3	5	4	4	5
1	2	1	64	5	4	4	69	3	3	3	3	2	3	3	3	2	3	3	3	2	3	3	3	2	3	2	3	60	36	24	6	6	6	6	6	6	6	6	6	6
1	2	1	6	2	3	2	45	2	1	1	1	2	1	1	2	3	2	1	1	4	1	1	2	3	2	3	2	54	32	22	5	5	6	6	5	5	5	5	6	6
1	2	1	15	2	3	5	51	2	3	2	2	3	1	1	3	2	1	2	2	3	2	3	1	3	1	3	1	49	28	21	6	5	5	6	4	5	5	3	5	5
1	2	1	80	5	4	5	44	1	1	1	1	4	1	1	1	4	1	1	1	4	1	1	1	4	1	4	1	30	18	12	3	3	3	3	3	3	3	3	3	3
1	2	1	27	4	3	3	53	2	2	2	2	3	2	2	2	3	2	2	2	4	1	1	1	3	2	3	1	50	30	20	5	5	5	5	5	5	5	5	5	5
1	2	1	48	4	4	4	36	1	2	1	1	3	1	1	1	3	1	1	1	1	1	1	1	2	1	4	1	46	34	12	7	4	4	1	5	3	6	6	4	6
1	2	1	48	4	4	4	44	1	1	1	1	4	1	1	1	4	1	1	1	4	1	1	1	4	1	4	1	40	24	16	4	4	4	4	4	4	4	4	4	4
1	2	1	12	3	3	2	44	1	1	1	1	4	1	1	1	4	1	1	1	4	1	2	1	2	2	3	2	50	33	17	6	4	7	4	5	4	5	5	5	5
1	2	1	32	3	4	4	40	2	1	2	1	2	1	2	2	2	2	2	1	1	1	2	1	3	1	2	1	51	30	21	5	6	5	5	5	5	5	5	5	5
1	2	1	24	4	2	4	43	2	2	2	1	2	1	1	1	2	2	1	1	2	2	1	1	4	1	3	2	47	28	19	5	5	5	5	5	5	5	4	4	4
1	2	1	15	2	5	3	51	3	3	3	3	3	1	1	1	2	2	1	1	4	1	1	1	4	1	4	1	44	25	19	4	5	2	4	6	6	6	4	4	3
1	2	1	64	5	4	4	45	1	1	2	1	3	1	1	3	3	2	1	1	1	1	3	1	4	1	4	1	40	25	15	3	3	4	3	3	5	5	5	4	5
1	2	1	6	4	2	1	40	1	1	1	1	4	1	1	1	1	4	1	1	4	1	1	1	4	1	1	1	40	24	16	4	4	4	4	4	4	4	4	4	4
1	2	1	60	5	3	5	41	2	2	2	2	3	2	2	2	2	1	1	1	1	1	1	1	4	1	1	1	50	30	20	5	5	5	5	5	5	5	5	5	5
1	2	1	16	5	4	1	35	2	1	1	1	2	1	1	1	2	1	1	1	2	1	1	1	2	2	2	2	46	30	16	5	5	5	2	5	4	5	5	5	5
1	2	1	80	5	5	4	28	2	1	2	1	1	1	1	1	1	1	1	1	1	1	1	1	1	1	1	1	64	42	22	7	4	7	7	7	4	7	7	7	7
1	2	1	8	3	2	2	46	2	2	2	1	2	1	2	1	3	2	2	1	1	1	3	2	3	2	2	2	59	36	23	6	5	6	6	6	6	6	6	6	6
1	2	1	6	2	3	2	48	2	1	2	1	3	2	1	2	3	2	1	1	3	1	1	2	4	1	3	2	46	28	18	4	5	5	5	5	4	4	5	4	5
1	2	1	12	3	3	2	33	1	1	1	1	2	1	1	1	2	1	1	1	2	1	1	2	2	1	2	1	55	32	23	7	6	5	5	5	6	5	5	6	5
1	2	1	80	5	4	5	54	2	2	2	2	3	2	2	2	3	2	2	2	4	1	1	1	4	1	4	1	40	24	16	4	4	4	4	4	4	4	4	4	4
1	2	1	100	5	5	5	39	1	1	1	1	1	1	1	1	3	1	1	1	4	1	1	2	3	2	3	1	43	27	16	7	4	4	4	4	4	4	4	4	4
1	2	1	12	5	3	1	40	1	1	1	1	4	1	1	1	4	1	1	1	4	1	1	1	4	1	1	1	64	42	22	7	7	7	7	7	1	7	7	7	7
1	2	1	48	5	3	4	43	2	1	1	1	3	1	1	2	3	1	1	1	4	1	1	1	4	2	2	1	49	31	18	5	6	6	2	5	5	5	5	5	5
1	2	1	8	5	2	1	59	2	2	3	1	3	3	2	3	3	2	2	2	3	2	2	2	3	2	3	2	50	30	20	5	5	5	5	5	5	5	5	5	5
1	2	1	18	4	3	2	34	1	1	1	1	2	1	1	1	2	1	1	1	4	1	1	1	2	1	2	1	56	36	20	7	5	7	7	6	5	5	6	3	5
1	2	1	80	5	5	4	46	2	1	1	1	4	1	1	1	4	1	1	1	4	1	2	3	3	1	3	1	41	25	16	5	4	4	4	4	4	4	4	4	4
1	2	1	48	5	4	3	40	2	1	1	1	1	1	1	1	3	2	1	1	4	1	1	3	2	2	2	1	45	37	8	7	3	6	1	6	2	6	6	2	6
1	2	1	24	4	4	2	35	1	1	2	1	1	1	1	1	2	1	1	1	4	1	1	1	4	1	1	1	55	32	23	6	7	4	3	7	6	4	5	7	6
1	2	1	18	4	3	2	50	2	1	2	2	3	2	2	2	3	2	2	1	3	1	1	2	2	2	3	2	50	30	20	5	5	5	5	5	5	5	5	5	5
1	2	1	36	4	4	3	34	1	1	1	1	2	1	1	1	2	1	1	1	1	1	1	1	3	2	2	2	44	37	7	6	2	6	2	6	1	7	7	2	5
1	2	1	100	5	5	5	41	1	1	1	1	2	1	1	4	4	1	1	1	1	1	1	3	4	1	2	1	47	38	9	7	1	7	1	6	1	6	6	6	6
1	2	1	36	4	3	4	31	1	1	1	1	2	1	1	2	2	1	1	1	1	1	1	1	2	1	2	1	50	31	19	5	6	6	4	5	4	5	5	5	5
1	2	1	48	4	4	4	38	2	1	1	1	3	1	1	1	3	1	1	1	1	1	1	1	3	2	3	1	57	38	19	7	6	7	5	6	4	6	6	4	6
1	2	1	36	4	3	4	33	1	1	1	1	1	1	1	2	1	1	1	1	4	1	1	1	3	1	1	1	39	33	6	2	1	7	2	7	1	6	5	2	6
1	2	1	48	5	4	3	29	1	1	1	1	3	1	1	1	1	1	1	1	1	1	1	1	1	1	2	1	50	36	14	7	1	1	5	7	1	7	7	7	7
1	2	1	18	4	3	2	35	1	1	1	1	2	1	1	1	2	1	1	1	1	1	1	3	3	1	3	1	45	26	19	4	5	5	5	5	4	4	4	5	4
1	2	1	18	4	3	2	39	2	2	1	1	2	1	1	2	2	2	1	1	1	1	1	3	2	1	2	2	42	30	12	6	5	4	3	5	2	6	5	2	4
1	2	1	32	5	4	2	59	3	3	1	1	4	1	1	1	3	2	3	3	2	3	3	2	3	3	3	2	38	24	14	3	3	3	3	3	3	5	5	5	5
1	2	1	12	5	3	1	58	2	2	2	2	3	2	2	2	3	4	3	1	4	2	1	1	4	1	4	1	41	25	16	4	4	5	4	4	4	4	4	4	4
1	2	1	6	4	2	1	44	2	1	1	1	2	2	1	3	3	2	2	1	2	1	1	1	3	1	3	2	38	24	14	5	3	3	3	4	4	4	4	4	4
1	2	1	48	5	3	4	44	1	1	1	1	4	1	1	1	4	1	1	1	4	1	1	1	4	1	4	1	40	24	16	4	4	4	4	4	4	4	4	4	4
1	2	1	60	5	3	5	44	2	1	2	1	3	1	1	2	3	2	1	1	4	1	1	1	1	2	3	2	50	29	21	7	7	6	7	7	3	3	3	4	3
1	2	1	64	5	4	4	69	3	3	3	3	2	3	3	3	2	3	3	3	2	3	3	3	2	3	2	3	59	39	20	7	4	7	5	7	7	7	6	4	5
1	2	1	27	4	3	3	40	1	1	1	1	4	1	1	1	3	1	1	1	3	1	1	1	4	1	3	1	53	32	21	5	4	5	5	5	6	6	5	6	6
1	2	1	64	5	4	4	43	1	1	1	1	4	1	2	1	3	1	1	1	4	1	1	1	4	1	3	1	52	31	21	5	6	6	6	5	4	5	5	5	5
1	2	1	12	4	2	2	64	2	2	3	3	2	3	2	2	3	3	2	3	3	3	2	2	3	3	3	2	32	20	12	3	3	3	3	3	4	2	4	2	5
1	2	1	30	4	5	2	40	2	2	1	1	2	2	1	1	2	2	1	1	2	1	1	2	4	1	2	1	60	36	24	6	6	6	6	6	6	6	6	6	6
1	2	1	15	4	5	1	39	2	1	2	2	4	1	1	1	2	1	1	1	1	1	1	1	3	1	3	1	48	30	18	5	5	5	3	5	5	5	5	5	5
1	2	1	8	5	2	1	69	3	3	3	3	2	3	3	3	2	3	3	3	2	3	3	3	2	3	2	3	70	42	28	7	7	7	7	7	7	7	7	7	7
1	2	1	24	3	4	3	56	2	2	2	2	3	2	2	2	3	2	2	2	3	2	2	2	3	2	3	2	40	24	16	4	4	4	4	4	4	4	4	4	4
1	2	1	32	5	4	2	49	2	2	2	2	2	1	1	2	3	2	2	1	4	1	1	1	4	1	3	2	40	24	16	4	4	4	4	4	4	4	4	4	4
1	2	1	12	4	4	1	56	2	2	2	2	3	2	2	2	3	2	2	2	3	2	2	2	3	2	3	2	30	18	12	3	3	3	3	3	3	3	3	3	3
1	2	1	36	4	4	3	56	2	2	2	2	3	2	2	2	3	2	2	2	3	2	2	2	3	2	3	2	50	30	20	5	5	5	5	5	5	5	5	5	5
1	2	1	18	4	2	3	65	2	2	2	3	4	2	3	4	4	3	2	1	4	2	2	2	3	2	3	2	41	25	16	2	2	3	5	7	5	5	4	4	4
1	2	1	64	5	4	4	39	2	1	1	1	2	1	2	2	2	2	2	1	2	1	1	2	1	2	2	1	46	28	18	5	5	3	3	5	5	5	5	5	5
1	2	1	24	5	3	2	40	1	1	1	1	2	1	1	1	4	1	1	1	4	1	1	2	3	1	3	1	55	32	23	4	6	4	5	6	6	6	6	6	6
1	2	1	40	5	5	2	55	2	2	2	1	1	2	4	4	1	2	2	2	2	2	2	4	1	4	2	2	56	39	17	5	7	7	1	6	3	7	7	6	7
1	2	1	40	5	2	5	31	2	1	1	1	2	1	1	1	2	1	1	1	1	1	1	1	2	2	1	1	39	25	14	6	4	4	3	4	4	4	4	3	3
1	2	1	64	5	4	4	51	4	2	3	1	2	2	2	2	2	2	2	2	1	1	1	3	3	2	3	1	48	31	17	6	4	5	2	5	7	6	5	4	4
1	2	1	36	4	3	4	34	1	1	1	1	3	1	1	1	1	1	2	1	1	1	2	1	2	2	2	1	49	29	20	4	6	6	5	6	4	4	5	5	4
1	2	1	18	4	3	2	39	2	1	1	1	3	1	1	1	3	2	1	1	2	1	2	1	3	1	2	1	40	23	17	3	4	3	4	5	5	4	4	4	4
1	2	1	6	2	3	2	55	3	2	2	1	2	1	3	2	3	1	3	1	3	1	3	2	4	2	4	1	45	31	14	6	4	4	2	6	6	4	7	2	4
1	2	1	9	4	3	1	38	1	1	1	1	4	1	1	1	2	1	1	1	4	1	1	1	4	1	1	1	43	27	16	5	3	4	4	5	4	4	4	5	5
1	2	1	27	4	3	3	56	2	2	2	2	3	2	2	2	3	2	2	2	3	2	2	2	3	2	3	2	30	18	12	3	3	3	3	3	3	3	3	3	3
1	2	1	4	2	2	2	36	2	1	2	1	2	1	1	1	2	2	1	1	1	1	1	1	3	2	2	1	50	38	12	7	3	7	1	6	4	6	6	4	6
1	2	1	36	5	3	3	44	1	1	1	1	4	1	1	1	4	1	1	1	4	1	1	1	4	1	4	1	40	24	16	4	4	4	4	4	4	4	4	4	4
1	2	1	64	5	4	4	40	2	2	2	2	2	1	1	1	2	1	1	1	2	1	1	2	2	2	2	2	52	32	20	7	5	5	5	5	5	5	5	5	5
1	2	1	0	1	1	3	58	2	2	2	2	3	2	2	2	3	2	2	2	3	2	2	2	3	3	3	2	70	42	28	7	7	7	7	7	7	7	7	7	7
1	2	1	18	4	3	2	40	1	1	2	1	3	1	3	2	3	1	1	1	2	1	1	1	2	1	3	1	40	36	4	7	1	7	1	7	1	5	5	1	5
1	2	1	48	5	4	3	30	1	1	1	1	1	1	1	1	1	1	1	1	4	1	1	1	1	1	2	1	70	42	28	7	7	7	7	7	7	7	7	7	7
1	2	1	16	2	4	4	40	1	1	1	1	4	1	1	1	1	1	1	1	4	1	1	1	4	1	4	1	68	42	26	7	7	7	7	7	7	7	7	5	7
1	2	1	16	5	2	2	48	1	2	2	1	3	3	1	1	2	1	1	1	3	1	3	3	4	1	3	1	53	28	25	5	6	5	5	4	7	5	4	7	5
1	2	1	36	5	3	3	59	2	3	2	1	2	3	3	2	2	2	3	3	3	3	3	2	2	2	2	2	47	29	18	4	5	5	4	5	5	5	5	4	5
1	2	1	8	2	2	4	81	4	4	4	4	1	4	4	4	1	4	4	4	1	4	4	4	1	4	1	4	70	42	28	7	7	7	7	7	7	7	7	7	7
1	2	1	16	3	4	2	69	3	3	3	3	2	3	3	3	2	3	3	3	2	3	3	3	2	3	2	3	50	30	20	5	5	5	5	5	5	5	5	5	5
1	2	1	12	5	3	1	41	2	1	1	4	1	1	1	2	4	2	1	1	1	1	1	1	2	1	4	1	58	40	18	7	5	6	2	7	7	6	7	4	7
1	2	1	36	5	3	3	58	1	1	3	2	3	1	4	3	3	3	1	2	2	2	2	1	3	1	4	4	47	27	20	4	5	4	5	6	5	5	4	5	4
1	3	1	18	4	3	2	33	1	1	1	1	1	1	1	1	1	1	1	1	1	1	1	1	4	1	4	1	70	42	28	7	7	7	7	7	7	7	7	7	7
1	3	1	80	5	5	4	39	2	2	2	1	3	1	2	1	2	1	1	1	1	1	1	2	2	1	3	1	40	24	16	4	4	4	4	4	4	4	4	4	4
1	3	1	0	1	1	1	56	2	2	2	2	3	2	2	2	3	2	2	2	3	2	2	2	3	2	3	2	40	24	16	4	4	4	4	4	4	4	4	4	4
1	3	1	100	5	5	5	35	2	1	1	2	1	1	1	1	2	1	1	1	2	1	1	1	1	3	3	1	43	37	6	7	2	7	1	2	2	7	7	1	7
1	3	1	24	3	4	3	44	1	1	1	1	4	1	1	1	4	1	1	1	4	1	1	1	4	1	4	1	40	24	16	4	4	4	4	4	4	4	4	4	4
1	3	1	15	2	5	3	56	2	2	2	2	3	2	2	2	3	2	2	2	3	2	2	2	3	2	3	2	40	24	16	4	4	4	4	4	4	4	4	4	4
1	3	1	100	5	5	5	25	1	1	1	1	1	1	1	1	1	1	1	1	1	1	1	1	1	1	1	1	58	42	16	7	1	7	7	7	1	7	7	7	7
1	3	1	36	4	4	3	31	1	1	1	1	2	1	1	1	2	1	1	1	2	1	1	1	2	1	2	1	58	35	23	5	5	6	6	6	6	6	6	6	6
1	3	1	2	2	2	1	25	1	1	1	1	1	1	1	1	1	1	1	1	1	1	1	1	1	1	1	1	70	42	28	7	7	7	7	7	7	7	7	7	7
1	3	1	24	5	2	3	54	4	4	4	1	1	1	3	4	1	4	1	1	1	1	1	1	4	4	1	1	55	36	19	4	4	7	4	7	5	6	6	6	6
1	3	1	12	3	3	2	45	2	1	1	1	2	1	3	2	3	2	2	1	4	1	1	1	1	3	2	2	37	24	13	4	3	2	3	4	4	4	5	3	5
1	3	1	64	5	4	4	58	2	2	2	2	3	2	2	2	3	2	2	2	3	2	2	2	4	2	3	2	50	30	20	5	5	5	5	5	5	5	5	5	5
1	3	1	30	3	3	5	33	1	1	1	1	2	1	1	1	2	1	1	1	2	1	1	1	3	1	2	1	41	27	14	7	2	4	4	4	4	4	4	4	4
1	3	1	8	2	4	2	35	2	1	2	1	2	1	1	2	3	1	1	1	2	1	1	1	1	2	1	1	47	36	11	6	2	6	1	6	3	6	6	5	6
1	3	1	48	5	3	4	58	3	2	2	2	3	2	2	2	3	2	2	2	3	2	2	2	3	2	3	2	26	16	10	3	2	3	3	1	2	3	4	3	2
1	4	1	24	5	2	3	56	2	2	2	2	3	2	2	2	3	2	2	2	3	2	2	2	3	2	3	2	58	36	22	6	5	6	5	6	6	6	6	6	6
1	4	1	48	5	3	4	36	2	1	1	1	2	1	1	1	2	1	1	1	2	1	1	2	3	2	2	1	49	31	18	6	6	5	3	4	3	5	5	6	6
1	4	1	24	4	4	2	50	2	1	2	1	4	1	2	2	3	2	2	2	2	1	1	1	4	2	4	1	42	22	20	2	5	5	5	4	5	3	3	5	5
1	4	1	48	5	3	4	55	3	1	3	2	3	3	2	3	2	1	3	2	2	2	2	2	2	2	2	2	49	35	14	6	3	6	5	6	2	5	6	4	6
1	4	1	80	5	5	4	25	1	1	1	1	1	1	1	1	1	1	1	1	1	1	1	1	1	1	1	1	48	35	13	6	4	5	2	6	3	6	6	4	6
1	4	1	36	5	3	3	41	1	1	1	1	4	1	1	1	4	1	1	1	4	1	1	1	3	1	3	1	43	29	14	5	4	4	3	5	3	5	5	4	5
1	4	1	0	1	5	1	63	2	3	2	3	3	2	3	1	3	2	2	3	3	2	3	2	4	2	3	2	27	16	11	2	3	4	4	3	1	3	2	3	2
1	4	1	48	5	3	4	38	2	2	2	1	2	1	1	3	2	1	2	1	1	1	1	1	2	1	2	1	70	42	28	7	7	7	7	7	7	7	7	7	7
1	4	1	48	4	4	4	49	3	1	1	2	4	1	4	3	3	2	1	1	4	1	1	1	2	1	1	2	49	33	16	5	6	5	4	6	3	6	5	3	6
1	4	1	24	4	4	2	50	3	3	2	4	1	3	2	3	1	1	1	1	4	1	1	1	2	1	3	2	58	34	24	5	7	6	5	6	6	7	6	6	4
1	4	1	60	5	5	3	51	3	2	2	1	2	1	1	2	2	3	2	2	3	2	2	3	2	2	2	2	55	36	19	6	3	6	6	6	4	6	6	6	6
1	4	1	80	5	4	5	39	1	1	2	2	2	1	1	1	3	1	1	1	2	1	2	2	2	1	3	1	61	37	24	7	6	6	6	6	6	6	6	6	6
1	4	1	36	4	3	4	58	3	4	4	2	3	1	1	2	4	1	1	1	3	1	1	2	3	4	3	2	42	25	17	4	2	3	5	3	5	5	5	5	5
1	4	1	100	5	5	5	44	2	2	1	1	3	1	1	1	4	1	1	1	4	1	1	1	2	2	3	2	41	26	15	2	4	5	5	5	3	5	5	3	4
1	4	1	48	5	3	4	33	1	1	2	1	2	1	1	1	2	1	1	1	2	1	1	1	2	1	2	1	48	36	12	6	3	6	3	6	3	6	6	3	6
1	4	1	6	3	3	1	54	3	2	2	2	3	2	2	2	2	2	2	2	2	2	2	2	3	2	2	2	58	36	22	6	6	6	4	6	6	6	6	6	6
1	4	1	30	4	2	5	68	3	3	3	3	2	3	3	3	2	3	3	3	2	3	3	3	2	3	2	2	50	30	20	5	5	5	5	5	5	5	5	5	5
1	4	1	48	5	3	4	35	1	1	2	1	2	1	1	2	2	1	1	1	2	1	1	1	2	2	2	1	46	38	8	7	2	6	2	7	1	6	6	3	6
1	4	1	45	4	3	5	34	2	1	1	1	2	1	1	1	2	1	1	1	2	1	1	1	2	1	2	2	50	30	20	5	5	5	5	5	5	5	5	5	5
1	4	1	3	2	3	1	46	2	2	2	1	3	1	1	2	3	1	1	1	4	1	2	1	4	1	3	1	40	24	16	4	3	3	3	5	5	4	5	5	3
1	4	1	12	5	3	1	44	2	2	2	1	2	1	1	1	3	1	3	1	1	1	4	1	4	1	2	1	40	22	18	4	4	4	5	3	4	4	4	5	3
1	1	2	100	5	5	5	56	2	2	2	2	3	2	2	2	3	2	2	2	3	2	2	2	3	2	3	2	50	30	20	5	5	5	5	5	5	5	5	5	5
1	1	2	24	3	3	4	69	3	3	3	3	2	3	3	3	2	3	3	3	2	3	3	3	2	3	2	3	40	24	16	4	4	4	4	4	4	4	4	4	4
1	1	2	36	4	3	4	33	1	1	1	1	4	1	1	1	1	1	1	1	1	1	1	1	4	1	1	1	57	36	21	6	6	6	5	6	4	6	6	6	6
1	1	2	64	5	4	4	35	2	1	1	1	2	1	1	1	2	1	1	1	2	1	1	1	3	2	2	1	53	34	19	5	3	6	5	6	5	5	6	6	6
1	1	2	8	3	4	1	63	2	2	2	3	2	2	3	3	2	3	3	3	3	2	3	3	2	2	2	3	40	24	16	4	4	4	4	4	4	4	4	4	4
1	1	2	64	5	4	4	29	1	1	1	1	1	1	1	1	1	1	1	1	1	1	1	1	4	1	1	1	53	42	11	7	1	7	1	7	4	7	7	5	7
1	1	2	27	4	3	3	33	1	1	1	1	2	1	1	1	2	2	1	1	1	1	1	2	2	1	2	1	43	37	6	6	2	6	1	7	2	6	6	1	6
1	1	2	24	3	3	4	43	2	1	1	1	3	2	1	2	1	1	1	1	1	2	2	2	4	1	3	2	52	36	16	6	2	6	2	6	6	6	6	6	6
1	1	2	18	4	3	2	34	2	1	1	1	3	1	1	1	2	1	1	1	2	1	1	1	2	1	2	1	46	30	16	7	4	4	4	4	4	4	7	4	4
1	1	2	0	1	4	3	39	2	1	1	1	3	1	1	1	3	2	1	1	2	1	1	2	2	2	2	1	43	27	16	5	3	4	4	4	5	5	5	4	4
1	1	2	48	4	4	4	33	2	1	1	1	2	1	1	1	2	1	1	1	1	1	1	1	4	1	1	1	70	42	28	7	7	7	7	7	7	7	7	7	7
1	1	2	24	5	3	2	48	3	2	2	1	2	1	1	1	2	2	1	2	2	1	3	3	3	3	2	1	44	26	18	4	5	4	4	3	4	5	5	5	5
1	1	2	6	2	3	2	38	1	1	1	1	3	1	1	1	3	1	1	1	2	1	2	2	3	1	1	2	50	30	20	5	5	5	5	5	5	5	5	5	5
1	2	2	36	4	4	3	43	1	1	1	1	3	1	1	1	4	1	1	1	4	1	1	1	4	1	4	1	42	30	12	5	1	5	1	5	5	5	5	5	5
1	2	2	48	5	3	4	43	1	1	1	1	4	1	1	1	3	2	1	1	4	1	1	1	4	1	3	1	36	24	12	6	2	2	2	2	2	2	6	6	6
1	2	2	9	4	3	1	81	4	4	4	4	1	4	4	4	1	4	4	4	1	4	4	4	1	4	1	4	70	42	28	7	7	7	7	7	7	7	7	7	7
1	2	2	0	1	2	1	59	3	2	3	2	2	2	3	2	3	2	2	2	3	2	2	2	3	2	3	2	32	20	12	4	4	3	3	4	2	3	3	3	3
1	2	2	45	4	5	3	58	2	2	2	2	3	2	2	2	3	2	2	2	3	2	2	2	3	2	3	3	50	30	20	5	5	5	5	5	5	5	5	5	5
1	2	2	36	4	3	4	31	2	1	1	1	2	1	1	1	2	1	1	1	2	1	1	1	2	1	1	1	49	41	8	7	2	6	2	7	2	7	7	2	7
1	2	2	12	5	3	1	44	1	1	1	1	3	2	1	2	2	1	1	1	4	1	2	1	4	1	3	2	41	25	16	5	4	4	4	4	4	4	4	4	4
1	2	2	12	3	2	3	49	2	2	2	2	3	1	2	1	1	1	2	1	3	2	2	2	3	2	3	2	13	6	7	1	4	1	1	1	1	1	1	1	1
1	2	2	64	5	4	4	39	1	1	1	1	3	1	1	1	3	1	1	1	3	1	1	1	4	1	3	1	40	24	16	4	4	4	4	4	4	4	4	4	4
1	2	2	27	4	3	3	34	2	1	1	1	2	1	1	1	2	2	1	1	1	1	1	2	2	1	2	1	47	39	8	7	2	6	3	6	2	7	7	1	6
1	2	2	0	1	2	1	58	2	1	2	3	2	2	3	3	3	3	2	1	3	3	3	1	2	3	2	2	37	24	13	4	2	5	2	5	3	4	3	6	3
1	2	2	80	5	5	4	29	2	2	1	1	1	1	1	1	1	1	1	1	1	1	1	1	1	1	2	1	58	42	16	7	1	7	4	7	4	7	7	7	7
1	2	2	8	3	2	2	38	1	1	1	2	3	1	1	1	4	1	1	1	3	1	1	1	2	1	2	1	40	24	16	4	4	4	4	4	4	4	4	4	4
1	2	2	5	2	5	1	50	2	1	1	1	4	2	2	2	3	2	2	1	4	2	2	1	2	2	3	1	42	22	20	6	5	4	5	3	4	3	2	6	4
1	2	2	48	5	3	4	36	2	1	1	1	2	1	1	1	2	1	1	1	2	1	1	1	3	2	3	1	49	29	20	5	6	3	3	6	6	5	5	5	5
1	2	2	0	1	1	1	58	2	1	3	2	2	3	2	3	3	3	2	1	2	2	3	3	3	2	2	2	40	24	16	4	4	4	4	4	4	4	4	4	4
1	2	2	6	3	3	1	56	2	2	2	2	3	2	2	2	3	2	2	2	3	2	2	2	3	2	3	2	40	24	16	4	4	4	4	4	4	4	4	4	4
1	2	2	12	5	3	1	61	3	3	3	3	3	1	2	2	2	3	2	2	2	2	2	2	3	3	4	2	70	42	28	7	7	7	7	7	7	7	7	7	7
1	2	2	18	3	3	3	38	1	1	1	1	2	1	1	1	2	1	1	1	4	1	1	1	4	2	2	1	20	12	8	2	2	2	2	2	2	2	2	2	2
1	2	2	100	5	5	5	36	2	2	2	1	3	1	1	1	2	1	1	1	3	1	1	1	1	1	2	1	55	36	19	6	5	6	4	6	5	6	6	5	6
1	2	2	24	4	4	2	36	1	1	1	1	2	1	1	1	2	1	1	1	3	1	1	2	4	1	1	2	43	30	13	6	2	4	4	5	4	6	6	3	3
1	2	2	6	2	3	2	35	2	1	1	1	2	1	1	1	2	1	1	1	2	1	1	1	4	1	2	1	68	42	26	7	5	7	7	7	7	7	7	7	7
1	2	2	4	3	1	2	34	1	1	1	1	2	1	1	1	2	1	1	1	2	1	1	1	2	1	4	1	40	24	16	4	4	4	4	4	4	4	4	4	4
1	2	2	80	5	5	4	31	1	1	1	1	2	1	1	2	1	1	1	1	1	1	1	1	3	1	2	1	70	42	28	7	7	7	7	7	7	7	7	7	7
1	2	2	80	5	5	4	29	1	1	1	1	4	1	1	1	1	1	1	1	1	1	1	1	1	1	1	1	61	38	23	7	5	6	6	6	6	6	6	6	7
1	2	2	100	5	5	5	40	2	1	1	1	1	1	1	4	4	1	1	1	2	1	1	1	4	1	1	2	70	42	28	7	7	7	7	7	7	7	7	7	7
1	2	2	48	5	3	4	51	2	2	2	3	3	1	2	2	4	1	1	1	2	1	3	2	3	1	3	2	60	36	24	6	6	6	6	6	6	6	6	6	6
1	2	2	32	5	2	4	56	2	2	2	2	3	2	2	2	3	2	2	2	3	2	1	4	4	2	1	2	58	34	24	5	6	5	4	5	7	6	6	7	7
1	2	2	48	4	4	4	39	2	1	1	2	2	1	1	1	2	1	1	1	2	1	1	3	4	1	2	1	46	28	18	4	4	4	4	5	5	5	5	5	5
1	2	2	9	4	3	1	60	3	2	3	2	2	2	3	2	2	2	3	3	2	2	2	2	2	3	3	3	37	24	13	5	3	3	2	4	4	4	4	4	4
1	2	2	36	4	4	3	36	1	1	1	1	2	1	1	1	2	1	1	1	4	1	1	1	4	1	2	1	50	30	20	5	5	5	5	5	5	5	5	5	5
1	2	2	64	5	4	4	35	1	1	1	1	2	1	1	2	2	1	1	1	2	1	1	3	1	2	2	1	52	32	20	6	5	5	5	5	5	6	5	5	5
1	2	2	80	5	5	4	55	2	2	3	2	2	3	2	2	2	3	3	2	2	3	2	3	2	1	1	2	46	27	19	4	4	5	5	5	5	4	5	5	4
1	2	2	80	5	5	4	36	1	1	1	1	4	1	1	1	3	1	1	1	2	1	1	1	3	2	1	1	46	29	17	7	4	4	7	5	2	4	4	4	5
1	2	2	6	2	3	2	55	2	2	2	2	3	2	2	2	3	2	2	2	2	3	3	2	2	2	2	2	44	29	15	4	4	4	4	6	2	5	5	5	5
1	2	2	48	4	4	4	56	2	2	2	2	3	2	2	2	3	2	2	2	3	2	2	2	3	2	3	2	70	42	28	7	7	7	7	7	7	7	7	7	7
1	2	2	6	4	2	1	43	2	2	1	1	2	1	1	2	2	1	1	2	3	1	1	2	3	2	3	1	30	18	12	3	3	3	3	3	3	3	3	3	3
1	2	2	75	4	5	5	33	1	1	1	1	1	1	1	2	1	1	2	1	1	1	1	2	4	1	1	1	51	35	16	5	5	6	3	6	4	7	6	4	5
1	2	2	48	4	4	4	35	1	1	1	1	3	1	1	1	2	1	1	1	4	1	1	1	2	1	2	1	38	26	12	3	3	5	3	5	3	5	5	3	3
1	2	2	8	3	4	1	55	2	2	3	2	2	1	2	2	3	2	2	2	3	2	2	2	3	2	3	2	56	32	24	5	6	3	6	6	6	6	6	6	6
1	2	2	24	5	3	2	38	1	1	2	1	2	1	1	2	2	2	1	1	4	1	1	1	3	1	1	1	48	39	9	7	4	7	1	7	2	6	6	2	6
1	2	2	80	5	5	4	49	2	1	2	1	3	1	2	2	3	2	2	2	2	1	2	2	4	2	2	1	34	21	13	3	3	4	3	3	4	4	3	3	4
1	2	2	20	5	5	1	44	1	1	2	1	3	1	1	2	3	2	1	1	2	1	1	2	3	2	3	2	45	30	15	5	5	5	3	5	3	5	5	4	5
1	2	2	36	5	3	3	40	3	1	2	1	3	1	1	1	3	1	1	1	2	1	1	2	2	2	2	1	41	29	12	6	1	5	4	5	3	5	4	4	4
1	2	2	80	5	4	5	40	2	1	2	1	2	1	2	1	2	1	1	1	4	1	1	1	2	1	4	1	51	32	19	6	5	6	4	5	5	5	5	5	5
1	2	2	3	2	3	1	51	2	2	2	2	1	2	2	2	1	2	2	2	3	2	2	2	3	2	3	2	70	42	28	7	7	7	7	7	7	7	7	7	7
1	2	2	36	4	3	4	48	2	2	2	2	3	2	2	1	3	1	1	1	4	1	1	2	4	1	2	1	30	18	12	3	3	3	3	3	3	3	3	3	3
1	2	2	9	4	3	1	64	3	3	3	3	2	3	3	3	3	2	2	2	3	2	2	2	3	2	3	2	50	30	20	5	5	5	5	5	5	5	5	5	5
1	2	2	24	5	3	2	36	1	1	1	1	3	1	1	1	2	1	1	1	1	1	2	3	2	1	3	1	53	36	17	6	4	6	3	7	6	6	5	4	6
1	2	2	18	4	3	2	48	2	2	2	1	3	1	1	1	2	2	1	1	4	1	1	2	4	2	3	2	45	27	18	6	5	5	3	5	5	5	3	5	3
1	2	2	6	3	3	1	43	4	1	1	1	1	1	2	4	2	1	1	1	4	1	1	2	2	1	2	1	65	40	25	7	6	7	6	7	6	7	6	7	6
1	2	2	24	5	3	2	31	2	1	1	1	4	1	1	1	1	1	1	1	1	1	1	1	1	1	2	1	56	41	15	6	3	7	7	7	1	7	7	4	7
1	2	2	0	1	3	1	43	2	2	2	1	4	1	1	2	2	1	1	1	2	1	2	1	4	1	2	1	58	36	22	6	6	6	4	6	6	6	6	6	6
1	2	2	36	5	3	3	55	3	2	3	2	2	1	3	2	2	2	2	3	3	3	2	1	2	2	3	1	47	29	18	6	4	6	5	4	4	5	4	5	4
1	2	2	9	2	3	3	66	3	3	3	3	3	2	4	4	4	2	2	1	3	3	1	1	3	2	4	2	31	18	13	4	2	2	5	3	3	3	3	3	3
1	2	2	45	4	5	3	35	1	1	1	1	2	1	1	2	2	1	1	2	2	1	2	1	2	1	2	1	55	36	19	5	6	7	4	6	3	6	6	6	6
1	2	2	80	5	5	4	41	2	1	2	1	3	1	1	1	3	1	1	1	2	1	1	2	4	1	2	2	50	30	20	4	6	6	6	6	4	5	4	4	5
1	2	2	2	2	2	1	45	1	2	1	1	4	1	1	1	4	1	1	1	4	1	1	1	4	1	4	1	46	26	20	3	6	3	4	5	5	5	5	5	5
1	2	2	20	3	5	2	55	3	3	3	2	3	2	1	2	3	3	1	1	2	1	1	2	3	2	4	2	60	36	24	6	6	6	6	6	6	6	6	6	6
1	2	2	12	3	3	2	39	2	1	1	1	4	1	2	1	3	1	1	1	2	1	1	1	2	1	3	1	51	36	15	6	4	6	3	6	4	6	6	4	6
1	2	2	20	5	5	1	63	2	3	3	3	2	3	3	2	3	3	2	2	2	2	2	3	2	3	3	2	44	26	18	5	5	5	5	4	4	4	4	4	4
1	2	2	9	2	3	3	56	2	2	2	2	3	2	2	2	3	2	2	2	3	2	2	2	3	2	3	2	43	27	16	7	4	4	4	4	4	4	4	4	4
1	2	2	9	4	3	1	38	2	1	1	1	2	2	1	1	2	2	2	1	1	1	1	1	3	2	1	2	42	30	12	6	5	6	3	5	1	5	6	3	2
1	2	2	0	1	2	1	56	2	2	2	2	3	2	2	2	3	2	2	2	3	2	2	2	3	2	3	2	30	18	12	3	3	3	3	3	3	3	3	3	3
1	2	2	24	5	3	2	45	2	1	2	1	2	1	2	2	2	1	2	2	4	2	2	1	2	1	3	1	55	33	22	5	6	6	5	5	6	6	5	5	6
1	2	2	24	4	4	2	56	2	2	2	2	3	2	2	2	3	2	2	2	3	2	2	2	3	2	3	2	26	15	11	1	3	2	3	3	2	3	3	3	3
1	2	2	64	5	4	4	46	2	2	2	1	2	1	2	2	3	2	2	1	2	1	1	2	3	2	2	2	46	28	18	5	3	3	5	5	5	5	5	5	5
1	2	2	9	4	3	1	43	1	1	2	1	2	1	1	1	4	1	1	1	4	1	1	1	4	1	4	1	41	26	15	7	3	3	4	4	4	4	4	4	4
1	2	2	3	2	3	1	38	2	1	1	1	1	1	2	2	2	1	2	2	1	1	2	1	3	2	1	1	40	24	16	4	4	4	4	4	4	4	4	4	4
1	2	2	10	2	5	2	69	2	3	2	3	3	3	2	3	3	3	2	3	3	3	2	3	3	3	3	3	32	19	13	3	3	3	3	3	3	3	3	4	4
1	2	2	32	5	4	2	41	2	1	1	1	2	1	2	2	2	2	1	1	2	1	1	2	3	2	3	1	50	31	19	7	4	4	5	5	5	5	5	5	5
1	2	2	64	5	4	4	45	1	1	2	1	3	2	1	1	4	1	1	1	4	1	1	1	4	1	4	1	40	24	16	4	4	4	4	4	4	4	4	4	4
1	2	2	48	5	4	3	39	1	1	2	1	1	1	1	1	3	2	1	1	4	1	1	2	3	1	2	1	57	36	21	6	6	6	6	6	3	6	6	6	6
1	2	2	40	3	5	4	56	2	2	2	2	3	2	2	2	3	2	2	2	3	2	2	2	3	2	3	2	41	25	16	5	4	4	4	4	4	4	4	4	4
1	2	2	16	3	4	2	53	2	3	3	2	4	1	1	2	4	2	2	1	3	1	1	1	2	1	4	2	50	28	22	4	6	4	5	5	6	5	5	5	5
1	2	2	32	5	2	4	30	1	1	1	1	1	1	1	4	1	1	1	1	1	1	1	1	1	1	2	1	40	23	17	5	7	1	4	4	3	4	3	3	6
1	2	2	48	4	4	4	38	2	1	1	1	2	1	1	2	3	1	1	1	3	1	1	1	3	1	2	1	49	30	19	5	6	5	4	5	5	5	5	4	5
1	2	2	80	5	5	4	55	2	1	2	2	3	2	2	2	3	2	2	2	3	2	2	2	3	2	3	2	54	34	20	6	5	5	5	6	5	5	6	5	6
1	2	2	64	5	4	4	69	3	3	3	3	2	3	3	3	2	3	3	3	2	3	3	3	2	3	2	3	52	30	22	5	6	5	6	5	5	5	5	5	5
1	2	2	45	4	5	3	35	1	1	1	1	4	1	1	1	2	1	1	1	1	1	1	1	3	1	2	2	40	28	12	5	3	3	3	5	2	5	5	4	5
1	2	2	15	2	5	3	26	2	1	1	1	1	1	1	1	1	1	1	1	1	1	1	1	1	1	1	1	51	33	18	7	3	5	5	6	5	5	5	5	5
1	2	2	3	2	3	1	54	2	2	2	1	3	2	2	2	3	2	2	2	3	2	2	2	3	2	3	1	49	29	20	4	5	5	5	5	5	5	5	5	5
1	2	2	6	4	2	1	40	2	1	1	1	3	1	1	1	4	1	1	1	4	1	1	1	3	1	2	1	49	29	20	4	5	5	5	5	5	5	5	5	5
1	2	2	48	5	4	3	48	1	2	2	1	3	1	1	1	2	3	1	1	1	2	1	4	4	1	3	3	44	27	17	3	4	3	3	5	5	5	6	5	5
1	2	2	80	5	4	5	28	1	1	1	1	1	1	1	1	1	1	1	1	1	1	1	1	2	1	1	2	61	42	19	7	5	7	7	7	3	7	7	4	7
1	2	2	48	4	4	4	51	3	2	2	1	3	1	1	2	4	1	1	1	4	1	1	1	4	1	4	3	54	35	19	5	3	6	4	6	6	6	6	6	6
1	2	2	12	2	4	3	41	2	1	1	1	4	2	1	1	2	2	1	1	1	1	1	2	2	3	3	1	44	32	12	6	5	4	1	6	3	6	6	3	4
1	2	2	36	4	4	3	43	2	1	1	1	4	1	1	2	4	2	1	1	1	1	1	2	3	2	2	1	62	39	23	7	5	6	6	7	6	7	7	6	5
1	2	2	48	5	3	4	49	2	2	2	1	4	1	2	1	4	1	1	1	4	1	1	1	4	1	4	1	51	31	20	6	5	5	5	5	5	5	5	5	5
1	2	2	64	5	4	4	64	2	3	3	3	2	2	2	2	3	2	3	3	2	2	2	3	3	3	3	3	46	28	18	4	4	5	5	5	5	5	5	4	4
1	2	2	8	3	1	4	40	1	1	1	1	3	1	1	1	2	1	1	1	4	1	1	2	4	1	3	1	40	32	8	7	1	5	1	5	1	5	5	5	5
1	2	2	80	5	5	4	35	2	1	1	1	2	1	1	2	3	1	1	1	2	1	1	1	3	1	1	1	47	31	16	6	3	6	5	5	5	5	4	3	5
1	2	2	36	4	4	3	31	1	1	1	1	2	1	1	1	2	1	1	1	1	1	1	2	1	2	2	1	54	36	18	6	5	6	2	6	6	6	6	5	6
1	2	2	64	5	4	4	56	2	2	2	2	3	2	2	2	3	2	2	2	3	2	2	2	3	2	3	2	48	30	18	6	5	5	5	5	4	5	4	4	5
1	2	2	32	3	4	4	49	2	3	2	2	2	3	2	2	3	2	2	1	2	1	1	2	2	2	2	1	40	24	16	4	4	4	4	4	4	4	4	4	4
1	2	2	36	5	3	3	43	1	1	1	1	4	1	1	1	4	1	1	1	3	1	2	1	3	1	3	2	44	28	16	4	7	5	4	5	2	5	4	3	5
1	2	2	48	5	3	4	61	2	3	2	3	2	2	3	2	2	2	3	2	2	2	3	2	3	3	3	3	44	26	18	5	5	5	4	4	4	4	4	5	4
1	2	2	27	4	3	3	39	2	1	2	1	2	1	2	1	3	1	1	1	2	1	1	1	4	1	2	1	48	29	19	5	4	4	5	5	5	5	5	5	5
1	2	2	24	4	4	2	56	3	3	3	3	2	3	2	3	3	2	1	2	2	1	1	1	1	1	4	4	56	37	19	7	3	6	7	6	6	6	6	3	6
1	2	2	80	5	5	4	54	2	2	2	2	4	1	1	1	3	2	2	2	3	2	2	2	3	2	3	2	50	30	20	5	5	5	5	5	5	5	5	5	5
1	2	2	24	3	3	4	35	2	1	1	1	2	1	1	2	1	2	1	1	2	1	1	1	2	2	2	1	46	33	13	5	3	5	1	6	6	6	6	3	5
1	2	2	32	5	4	2	44	2	1	2	1	3	1	1	1	2	2	1	1	4	1	1	1	4	1	4	1	51	31	20	5	5	5	5	6	4	5	5	6	5
1	2	2	3	2	3	1	45	2	1	2	2	2	1	1	2	3	2	1	1	2	1	1	1	3	2	4	2	46	29	17	4	3	4	5	5	5	6	5	4	5
1	2	2	16	5	4	1	56	2	2	2	2	3	2	2	2	3	2	2	2	3	2	2	2	3	2	3	2	30	18	12	3	3	3	3	3	3	3	3	3	3
1	2	2	16	3	4	2	56	2	2	2	2	3	2	2	2	3	2	2	2	3	2	2	2	3	2	3	2	50	30	20	5	5	5	5	5	5	5	5	5	5
1	2	2	9	2	3	3	34	1	1	1	1	3	1	1	1	2	2	1	1	2	1	1	1	2	1	2	1	56	37	19	7	5	6	3	6	5	6	6	6	6
1	2	2	6	3	3	1	60	2	1	3	2	2	1	2	3	4	4	2	3	3	3	2	1	3	3	3	1	31	13	18	3	5	2	5	2	2	2	2	6	2
1	2	2	36	5	3	3	48	2	2	3	1	4	2	1	3	3	2	2	1	1	2	1	1	3	1	2	1	45	27	18	6	5	5	2	2	7	6	4	4	4
1	2	2	18	4	3	2	44	1	1	1	1	4	1	1	1	4	1	1	1	4	1	1	1	4	1	4	1	41	25	16	5	4	4	4	4	4	4	4	4	4
1	2	2	4	3	2	1	63	2	2	3	2	3	1	3	3	3	2	3	2	3	1	2	3	3	2	4	3	41	25	16	5	4	4	4	5	3	3	4	5	4
1	2	2	15	2	5	3	45	3	3	3	2	3	1	1	3	4	1	1	1	1	1	1	1	3	1	1	1	50	31	19	7	7	5	3	6	5	5	4	4	4
1	2	2	18	4	3	2	39	2	2	2	1	3	1	1	1	2	2	1	1	3	1	1	1	2	1	2	1	46	30	16	5	5	5	5	5	3	5	5	3	5
1	2	2	80	5	5	4	44	2	1	2	1	2	1	1	1	3	1	1	1	4	1	1	2	3	2	3	2	43	27	16	5	3	5	5	5	4	4	4	4	4
1	2	2	18	3	3	3	36	1	1	3	1	2	2	1	1	1	2	1	1	1	2	1	1	2	2	1	2	58	30	28	1	7	7	7	7	7	5	5	7	5
1	2	2	24	5	3	2	34	1	1	1	1	1	1	1	1	2	1	1	1	1	1	1	3	2	1	4	1	42	27	15	4	2	4	4	5	5	4	5	4	5
1	2	2	4	2	2	2	59	3	2	3	2	2	3	3	3	3	2	2	2	3	1	1	1	3	2	4	2	48	30	18	5	5	5	3	5	5	5	5	5	5
1	2	2	12	5	3	1	43	2	1	1	1	3	1	1	2	3	1	1	1	3	1	1	1	4	1	4	1	48	30	18	5	4	4	4	6	5	5	5	5	5
1	2	2	18	4	3	2	56	2	2	2	2	3	2	2	2	3	2	2	2	3	2	2	2	3	2	3	2	51	31	20	3	4	5	5	5	5	6	6	6	6
1	2	2	24	5	3	2	56	2	2	2	2	3	2	2	2	3	2	2	2	3	2	2	2	3	2	3	2	39	23	16	4	3	3	5	4	4	4	4	4	4
1	2	2	2	2	2	1	59	2	2	2	2	2	2	2	3	3	2	2	3	2	2	3	2	3	3	3	2	39	26	13	5	2	4	2	5	5	4	4	4	4
1	2	2	12	3	3	2	54	2	3	3	4	4	1	1	4	3	1	1	1	1	1	1	3	2	1	4	2	41	25	16	4	5	4	4	5	5	5	2	2	5
1	2	2	24	5	3	2	39	1	1	1	1	3	1	1	1	3	1	1	1	4	1	1	1	3	1	3	1	40	22	18	7	7	7	7	2	2	2	2	2	2
1	2	2	12	3	3	2	38	1	1	1	1	3	1	1	3	1	2	1	1	2	1	1	1	2	2	2	2	46	27	19	6	6	4	5	6	2	4	2	6	5
1	2	2	6	2	3	2	34	1	1	1	1	2	1	1	1	3	1	1	1	1	1	1	2	2	1	3	1	43	25	18	3	6	3	3	5	5	6	3	4	5
1	2	2	12	3	3	2	35	1	1	1	1	2	1	1	2	2	1	1	1	2	1	3	1	2	1	2	1	40	24	16	4	4	4	4	4	4	4	4	4	4
1	2	2	80	5	5	4	44	1	1	1	1	4	1	1	1	4	1	1	1	4	1	1	1	4	1	4	1	50	30	20	5	5	5	5	5	5	5	5	5	5
1	2	2	48	5	3	4	41	1	1	1	1	4	1	1	1	4	1	1	1	4	1	1	1	4	1	2	1	40	24	16	4	4	4	4	4	4	4	4	4	4
1	2	2	80	5	5	4	56	2	2	2	2	3	2	2	2	3	2	2	2	3	2	2	2	3	2	3	2	63	37	26	7	7	7	7	6	6	5	6	6	6
1	2	2	36	4	3	4	39	2	1	1	1	3	1	1	2	2	1	2	1	2	1	1	1	3	1	3	1	54	31	23	5	6	5	5	3	6	6	6	6	6
1	2	2	24	3	4	3	58	2	2	3	2	2	2	2	2	3	2	2	2	3	3	2	2	3	3	2	2	38	23	15	4	4	4	4	4	4	3	4	3	4
1	2	2	80	5	5	4	49	1	1	1	1	2	1	2	1	2	3	2	3	3	2	2	2	3	2	3	2	41	25	16	4	4	4	4	4	4	4	4	4	5
1	2	2	30	3	3	5	70	4	3	1	3	2	2	3	3	2	2	2	4	4	2	4	4	2	2	4	3	28	15	13	4	1	1	5	1	4	3	2	3	4
1	2	2	48	5	3	4	36	1	1	1	1	2	1	2	1	3	2	1	1	2	1	1	2	2	1	2	1	36	25	11	6	3	2	2	4	3	5	5	3	3
1	2	2	48	5	3	4	49	2	1	2	1	3	1	2	1	3	1	2	1	4	1	2	2	4	1	3	2	49	30	19	5	5	5	5	5	5	5	5	4	5
1	2	2	12	2	4	3	44	1	1	1	1	4	1	1	1	4	1	1	1	4	1	1	1	4	1	4	1	40	24	16	4	4	4	4	4	4	4	4	4	4
1	3	2	18	4	3	2	69	3	3	3	3	2	3	3	3	2	3	3	3	2	3	3	3	2	3	2	3	60	36	24	6	6	6	6	6	6	6	6	6	6
1	3	2	48	5	3	4	56	2	2	2	2	3	2	2	2	3	2	2	2	3	2	2	2	3	2	3	2	30	18	12	3	3	3	3	3	3	3	3	3	3
1	3	2	15	4	5	1	38	1	1	2	1	4	1	1	1	2	1	1	1	2	1	2	2	3	1	1	1	40	24	16	4	4	4	4	4	4	4	4	4	4
1	3	2	36	5	3	3	31	1	1	1	1	2	1	1	1	1	1	1	1	1	1	1	2	2	3	1	1	64	42	22	7	1	7	7	7	7	7	7	7	7
1	3	2	0	1	2	2	43	2	2	2	1	3	1	1	1	2	2	1	1	2	1	1	1	3	2	4	1	43	24	19	5	4	3	5	5	5	4	3	5	4
1	3	2	60	5	5	3	65	3	2	3	2	3	2	3	3	3	2	3	3	4	2	1	3	3	1	4	2	40	24	16	4	4	4	4	4	4	4	4	4	4
1	3	2	3	2	3	1	41	2	1	2	1	4	1	1	1	2	1	1	1	1	1	1	1	4	2	4	1	35	21	14	3	3	3	4	3	4	4	4	3	4
1	3	2	100	5	5	5	41	2	2	1	2	3	2	2	2	3	2	2	2	1	1	1	1	1	1	1	1	64	36	28	7	7	7	7	7	7	1	7	7	7
1	3	2	9	4	3	1	44	1	1	1	1	4	1	1	1	4	1	1	1	4	1	1	1	4	1	4	1	70	42	28	7	7	7	7	7	7	7	7	7	7
1	3	2	100	5	5	5	49	2	2	2	1	4	1	1	1	4	1	1	1	4	1	1	1	4	1	4	2	57	34	23	6	6	6	6	6	5	6	5	6	5
1	3	2	45	4	3	5	41	2	1	2	1	1	1	1	2	1	2	1	1	4	1	1	1	4	1	4	1	67	42	25	7	7	7	5	7	7	7	7	6	7
1	3	2	0	1	2	1	56	2	2	2	2	3	2	2	2	3	2	2	2	3	2	2	2	3	2	3	2	40	24	16	4	4	4	4	4	4	4	4	4	4
1	3	2	48	4	4	4	56	3	2	3	2	2	2	2	2	2	3	3	1	1	1	2	2	4	2	4	2	37	24	13	4	3	5	4	4	3	4	3	3	4
1	3	2	0	1	1	1	56	2	2	2	2	3	2	2	2	3	2	2	2	3	2	2	2	3	2	3	2	20	12	8	2	2	2	2	2	2	2	2	2	2
1	3	2	64	5	4	4	53	2	2	2	2	3	2	2	2	2	2	2	2	4	1	1	2	3	2	3	1	55	36	19	6	7	5	7	7	1	7	7	4	4
1	3	2	0	1	-2	1	69	3	3	3	3	2	3	3	3	2	3	3	3	2	3	3	3	2	3	2	3	50	30	20	5	5	5	5	5	5	5	5	5	5
1	3	2	64	5	4	4	33	2	1	1	1	2	1	1	1	2	1	1	1	2	1	1	1	2	1	2	1	47	30	17	5	3	5	5	5	4	5	5	5	5
1	3	2	8	3	2	2	54	3	3	3	2	4	1	2	2	4	2	1	1	2	1	2	3	2	2	2	1	43	25	18	4	5	3	5	4	3	5	5	5	4
1	3	2	24	4	4	2	44	2	1	2	1	2	1	1	2	4	1	1	1	2	1	1	2	4	1	4	1	44	26	18	6	5	4	4	4	5	4	4	4	4
1	3	2	36	4	4	3	39	1	1	1	1	2	1	2	1	2	3	1	1	2	1	1	2	2	3	2	1	57	35	22	6	6	6	6	6	5	5	6	5	6
1	3	2	64	5	4	4	46	2	1	1	1	3	1	2	3	3	2	2	2	2	1	1	3	2	2	2	1	61	42	19	7	3	7	6	7	5	7	7	5	7
1	3	2	18	4	3	2	51	2	2	2	2	2	3	2	2	2	1	2	2	4	1	1	3	2	2	2	2	53	32	21	6	5	5	5	5	5	6	5	6	5
1	3	2	3	2	3	1	45	2	2	2	2	3	1	1	2	3	1	1	1	2	1	1	2	3	2	3	1	50	31	19	1	1	6	6	6	6	6	6	6	6
1	3	2	4	3	2	1	44	1	1	1	1	4	1	1	1	3	2	1	1	1	1	3	2	3	2	3	2	59	36	23	6	6	6	6	6	6	6	6	5	6
1	3	2	12	3	3	2	69	3	3	3	3	2	3	3	3	2	3	3	3	2	3	3	3	2	3	2	3	41	26	15	5	3	3	4	4	3	4	5	5	5
1	3	2	48	5	3	4	38	1	1	1	1	1	1	2	2	2	1	2	1	2	2	1	2	2	1	3	1	53	32	21	5	6	5	3	4	6	6	6	6	6
1	3	2	12	3	3	2	46	2	2	1	1	3	2	2	2	3	1	1	1	4	1	1	1	4	1	3	1	36	22	14	3	3	3	3	4	4	4	4	4	4
1	3	2	32	5	4	2	64	3	2	4	4	3	3	4	2	3	2	4	2	1	2	1	1	2	2	4	2	39	26	13	4	2	4	3	5	4	4	5	4	4
1	3	2	24	4	4	2	43	2	2	2	2	2	1	1	1	2	2	1	2	2	1	1	1	4	2	2	1	50	30	20	5	5	5	5	5	5	5	5	5	5
1	3	2	64	5	4	4	36	1	1	1	1	4	1	1	1	4	1	1	1	1	1	1	1	4	1	1	1	68	42	26	7	7	7	7	7	5	7	7	7	7
1	3	2	16	3	4	2	45	2	1	2	2	3	1	1	1	3	1	1	1	3	2	1	1	4	1	4	1	33	23	10	5	3	3	2	4	3	5	4	2	2
1	3	2	2	2	2	1	51	2	2	2	1	3	2	2	2	3	2	2	2	3	1	2	1	3	2	3	1	50	30	20	5	5	5	5	5	5	5	5	5	5
1	3	2	48	5	3	4	56	2	2	2	2	3	2	2	2	3	2	2	2	3	2	2	2	4	1	3	2	29	14	15	3	7	3	4	2	2	2	2	2	2
1	4	2	48	5	3	4	45	2	2	2	1	3	1	1	2	3	1	1	1	2	1	2	1	4	1	3	2	49	31	18	6	6	5	4	5	6	6	4	2	5
1	4	2	64	5	4	4	43	2	1	2	1	2	1	1	1	3	1	1	1	1	1	3	2	3	1	4	2	51	31	20	5	5	5	4	5	5	5	5	6	6
1	4	2	30	4	5	2	65	2	2	3	2	3	3	2	3	3	2	3	3	3	3	2	2	3	2	3	3	47	28	19	4	6	6	4	6	5	5	4	4	3
1	4	2	80	5	4	5	35	1	1	1	1	2	1	1	2	2	1	1	1	1	1	1	2	1	4	2	1	57	36	21	6	6	6	5	6	7	6	6	3	6
1	4	2	36	5	3	3	35	2	1	1	1	2	1	1	2	2	1	1	1	2	1	1	1	2	1	3	1	50	30	20	5	5	5	5	5	5	5	5	5	5
1	4	2	15	4	5	1	34	1	1	1	1	2	1	1	2	2	1	1	1	2	1	1	1	3	1	2	1	62	41	21	7	4	7	6	6	7	7	7	4	7
1	4	2	48	5	3	4	41	1	1	2	1	1	1	2	4	2	1	2	1	1	1	1	1	3	2	4	1	43	33	10	4	3	7	3	6	1	6	4	3	6
1	4	2	64	5	4	4	38	2	1	1	2	2	1	1	2	3	1	1	1	2	1	1	1	2	1	2	2	50	32	18	6	5	6	5	5	4	5	5	4	5
1	4	2	18	3	3	3	41	2	1	1	1	3	1	1	2	2	1	1	1	2	1	3	2	4	1	2	1	54	33	21	5	6	6	5	6	5	5	5	5	6
1	4	2	48	5	3	4	44	2	2	2	1	2	1	1	1	2	2	1	1	4	1	1	1	4	2	2	2	41	27	14	4	3	4	5	4	3	5	5	3	5
1	4	2	32	5	2	4	59	3	3	3	3	3	2	2	2	3	2	2	2	4	1	1	1	4	1	4	1	43	25	18	1	4	5	5	4	5	5	4	4	6
1	4	2	64	5	4	4	49	2	1	2	1	3	2	2	2	3	2	2	2	3	1	2	2	3	1	2	1	57	34	23	4	5	6	6	6	6	6	6	6	6
1	4	2	18	4	2	3	51	2	2	2	1	3	1	2	2	4	2	1	1	4	1	1	1	4	1	4	2	40	24	16	4	4	4	4	4	4	4	4	4	4
1	4	2	0	1	2	1	36	3	1	1	1	1	1	2	2	2	2	1	1	1	1	1	1	1	2	2	2	52	32	20	5	4	6	5	6	5	6	3	6	6
1	4	2	2	2	2	1	56	2	2	2	2	3	2	2	2	3	2	2	2	3	2	2	2	3	2	3	2	25	14	11	1	3	1	2	3	3	3	3	3	3
1	4	2	32	5	2	4	53	2	2	3	3	2	2	2	3	2	2	2	1	2	2	1	2	2	2	3	2	54	35	19	5	5	6	5	6	5	6	6	4	6
1	4	2	2	2	2	1	64	3	4	1	1	2	2	4	1	1	2	1	4	4	3	1	4	3	3	3	4	33	21	12	5	3	5	2	2	5	2	5	2	2
1	4	2	48	5	3	4	59	2	2	2	2	2	3	3	3	3	2	2	2	3	2	2	2	3	2	3	2	47	29	18	5	5	5	4	5	5	5	5	4	4
1	2	1	27	4	3	3	38	1	1	1	1	3	1	1	1	3	1	1	1	2	1	1	2	3	1	3	1	61	37	24	7	7	5	7	7	5	7	6	5	5
1	2	1	9	4	3	1	44	1	1	1	1	4	1	1	1	4	1	1	1	4	1	1	1	4	1	4	1	70	42	28	7	7	7	7	7	7	7	7	7	7
1	1	1	0	1	1	1	69	3	3	3	3	2	3	3	3	2	3	3	3	2	3	3	3	2	3	2	3	39	23	16	1	1	2	5	5	5	5	5	5	5
1	1	1	80	5	5	4	34	1	1	1	1	4	1	1	1	2	1	1	1	2	1	1	1	2	1	2	1	60	38	22	5	5	5	5	7	5	7	7	7	7
1	1	1	6	3	3	1	51	2	1	2	1	3	1	2	1	3	2	2	2	3	2	2	2	3	2	3	2	57	33	24	5	6	5	6	5	6	6	6	6	6
1	1	1	80	5	5	4	36	2	2	2	1	2	1	1	1	2	1	1	1	2	1	1	1	3	2	1	1	42	28	14	4	5	4	3	7	3	4	5	3	4
1	1	1	12	4	2	2	44	2	1	1	1	1	1	2	3	2	3	1	1	3	1	4	2	2	2	1	1	48	35	13	7	7	5	2	6	1	7	7	3	3
1	1	1	48	5	3	4	34	1	1	1	1	2	1	1	1	2	1	1	1	1	1	2	1	4	2	1	1	49	36	13	7	2	7	3	7	4	5	6	4	4
1	1	1	48	5	3	4	40	2	1	2	1	2	1	1	1	2	1	1	1	4	1	1	1	4	1	3	1	56	34	22	6	4	4	6	6	6	6	6	6	6
1	1	1	64	5	4	4	39	1	2	1	1	3	1	1	1	2	2	1	1	3	1	1	1	4	1	2	1	40	28	12	4	2	5	4	5	2	5	5	4	4
1	1	1	80	5	5	4	30	2	1	1	1	1	1	1	1	2	1	1	1	1	1	1	2	1	2	1	1	43	27	16	7	4	4	4	4	4	4	4	4	4
1	1	1	36	4	3	4	43	2	1	1	1	3	2	2	2	2	2	1	1	2	1	1	2	2	2	3	1	41	32	9	5	3	5	2	6	2	6	5	2	5
1	2	1	12	3	3	2	39	2	3	2	1	2	1	1	2	1	2	1	1	1	1	3	1	1	1	2	2	69	42	27	7	6	7	7	7	7	7	7	7	7
1	2	1	20	5	5	1	81	4	4	4	4	1	4	4	4	1	4	4	4	1	4	4	4	1	4	1	4	70	42	28	7	7	7	7	7	7	7	7	7	7
1	2	1	1	2	1	1	31	1	1	1	1	1	1	1	1	1	1	1	1	4	2	1	1	2	1	1	1	58	36	22	7	7	7	6	7	4	5	5	5	5
1	2	1	48	5	3	4	54	2	2	2	2	2	2	2	2	2	2	2	2	3	2	2	2	3	2	3	2	50	30	20	5	5	5	5	5	5	5	5	5	5
1	2	1	6	2	2	3	56	2	2	3	1	4	1	2	2	3	2	2	2	3	2	2	2	3	2	3	2	49	32	17	3	5	5	2	6	6	6	6	4	6
1	2	1	8	5	2	1	31	1	1	1	1	4	1	1	1	2	1	1	1	1	1	1	1	1	1	1	2	70	42	28	7	7	7	7	7	7	7	7	7	7
1	2	1	24	5	3	2	35	1	1	1	1	2	1	1	1	2	1	1	1	4	1	1	1	4	1	1	1	52	38	14	7	1	7	4	3	5	7	7	4	7
1	2	1	60	4	4	5	41	2	2	2	2	3	1	1	1	2	1	1	1	2	1	1	1	4	1	2	2	61	36	25	6	7	6	6	6	6	6	6	6	6
1	2	1	36	4	3	4	29	1	1	1	1	2	1	1	1	2	1	1	1	1	1	1	1	1	1	2	1	41	30	11	7	3	5	3	6	3	4	4	2	4
1	2	1	64	5	4	4	41	2	1	2	1	2	1	1	1	4	1	1	1	4	1	1	1	4	1	2	1	43	26	17	5	5	5	4	4	4	4	4	4	4
1	2	1	27	4	3	3	56	2	2	2	2	3	2	2	2	3	2	2	2	3	2	2	2	3	2	3	2	24	14	10	4	4	2	2	2	2	2	2	2	2
1	2	1	100	5	5	5	43	1	1	1	1	4	1	1	1	3	1	1	1	4	1	1	1	4	1	4	1	40	24	16	4	4	4	4	4	4	4	4	4	4
1	2	1	0	1	3	1	25	1	1	1	1	1	1	1	1	1	1	1	1	1	1	1	1	1	1	1	1	70	42	28	7	7	7	7	7	7	7	7	7	7
1	2	1	80	5	5	4	64	2	2	3	2	4	2	3	2	4	3	2	1	4	2	3	4	1	3	3	1	10	6	4	1	1	1	1	1	1	1	1	1	1
1	2	1	80	5	5	4	39	1	1	1	1	2	2	2	2	2	1	1	1	2	1	1	1	3	2	2	2	50	30	20	5	5	5	5	5	5	5	5	5	5
1	2	1	100	5	5	5	63	3	3	2	3	3	2	1	2	1	4	3	2	2	2	3	3	2	3	3	3	50	30	20	5	5	5	5	5	5	5	5	5	5
1	2	1	48	5	3	4	69	3	3	3	3	2	3	3	3	2	3	3	3	2	3	3	3	2	3	2	3	40	24	16	4	4	4	4	4	4	4	4	4	4
1	2	1	8	2	4	2	56	2	2	2	2	3	2	2	2	3	2	2	2	3	2	2	2	3	2	3	2	36	21	15	1	2	3	4	5	6	5	4	3	3
1	2	1	64	5	4	4	39	2	1	1	1	4	1	1	2	3	2	1	1	1	1	1	2	2	1	2	1	47	31	16	4	3	5	3	5	6	6	6	4	5
1	2	1	3	2	3	1	44	1	1	1	1	4	1	1	1	4	1	1	1	4	1	1	2	3	1	3	2	49	28	21	4	5	6	5	4	5	4	5	6	5
1	2	1	36	4	4	3	40	1	1	1	1	2	2	2	3	2	2	1	1	3	1	1	2	2	2	1	1	56	33	23	6	4	6	7	6	6	5	5	6	5
1	2	1	18	3	3	3	30	1	1	1	1	1	1	1	2	1	1	1	1	1	1	1	3	2	1	1	1	54	32	22	4	4	4	6	6	6	6	6	6	6
1	2	1	6	2	3	2	50	1	1	1	1	4	3	2	3	1	3	2	2	1	2	2	2	2	2	4	1	59	36	23	6	6	6	6	6	4	6	6	7	6
1	2	1	18	4	3	2	35	1	1	1	1	1	1	1	1	2	1	1	1	2	1	1	2	3	2	3	1	60	36	24	6	6	6	6	6	6	6	6	6	6
1	2	1	18	4	3	2	48	2	2	2	1	4	1	1	1	4	1	1	1	4	1	1	1	4	1	4	1	50	30	20	5	5	5	5	5	5	5	5	5	5
1	2	1	18	4	3	2	59	2	2	2	2	3	2	2	2	3	2	2	2	3	2	2	2	3	2	4	3	36	28	8	5	2	5	2	4	2	5	5	2	4
1	2	1	9	4	3	1	36	1	1	1	1	2	1	1	1	3	2	1	2	1	1	1	2	1	2	2	2	43	26	17	4	5	5	5	5	4	4	4	3	4
1	2	1	18	4	3	2	34	3	2	1	1	1	2	1	1	1	2	1	1	1	2	1	1	2	1	1	1	60	36	24	7	7	5	5	7	5	5	6	7	6
1	2	1	18	4	3	2	41	2	1	2	1	4	1	1	1	2	1	1	1	4	1	1	1	2	2	3	1	39	28	11	7	3	5	2	5	2	5	3	4	3
1	2	1	64	5	4	4	44	1	1	1	1	4	1	2	1	2	2	1	1	4	1	1	2	3	2	3	1	48	36	12	6	3	6	3	6	3	6	6	3	6
1	2	1	20	5	5	1	54	2	2	2	2	1	2	2	2	3	2	2	2	2	3	2	2	3	1	4	2	43	29	14	7	3	1	1	7	3	4	3	7	7
1	2	1	80	5	5	4	36	2	1	1	1	3	1	1	1	1	1	1	1	1	1	1	1	3	1	3	3	56	37	19	7	5	6	4	6	5	7	7	5	4
1	2	1	0	1	5	1	25	1	1	1	1	1	1	1	1	1	1	1	1	1	1	1	1	1	1	1	1	45	36	9	6	1	6	1	6	1	6	6	6	6
1	2	1	18	4	3	2	33	1	1	1	1	2	1	1	2	2	1	1	1	2	1	1	1	2	2	1	1	57	36	21	6	5	6	5	7	5	6	6	6	5
1	2	1	36	5	3	3	35	1	1	1	1	2	1	1	1	2	2	1	1	2	1	1	2	2	2	2	1	50	30	20	5	5	5	5	5	5	5	5	5	5
1	2	1	2	2	2	1	33	1	1	1	1	2	1	1	2	1	1	1	1	1	1	1	1	4	1	2	1	41	25	16	5	4	4	4	4	4	4	4	4	4
1	2	1	0	1	2	1	46	1	2	2	1	4	1	1	3	3	1	1	1	3	1	1	1	4	1	3	2	41	22	19	4	5	3	5	4	5	4	5	4	2
1	2	1	24	5	3	2	40	1	1	1	1	2	1	1	1	2	2	1	1	4	1	1	1	4	1	3	2	38	29	9	2	2	6	2	6	2	5	5	3	5
1	2	1	18	4	3	2	38	1	1	1	1	4	1	1	1	3	1	1	1	2	1	1	2	3	1	2	1	64	36	28	6	7	7	7	6	7	7	5	7	5
1	2	1	4	5	1	1	38	2	1	1	1	1	1	1	2	1	1	1	1	4	1	1	1	4	1	2	2	55	39	16	7	7	7	4	7	1	7	7	4	4
1	2	1	18	4	3	2	56	2	2	2	2	3	2	2	2	3	2	2	2	3	2	2	2	3	2	3	2	40	24	16	4	4	4	4	4	4	4	4	4	4
1	2	1	30	3	5	3	39	1	1	1	1	4	1	1	1	2	1	1	1	4	1	1	1	4	1	2	1	50	30	20	5	5	5	5	5	5	5	5	5	5
1	2	1	24	5	3	2	33	1	1	1	1	2	1	1	1	3	2	1	1	1	1	1	1	2	1	2	1	50	30	20	5	5	5	5	5	5	5	5	5	5
1	2	1	20	2	4	5	76	4	4	3	4	1	3	3	4	1	4	4	3	2	3	3	4	3	2	2	4	47	30	17	5	4	6	4	5	5	5	4	4	5
1	2	1	80	5	5	4	39	2	1	1	1	1	2	2	3	1	2	3	2	1	2	1	1	1	2	1	1	50	33	17	7	5	5	4	6	4	5	5	4	5
1	3	1	0	1	1	1	39	2	1	1	1	2	1	1	1	3	2	1	1	4	1	1	2	1	2	2	1	45	30	15	5	2	5	5	5	3	5	5	5	5
1	3	1	0	1	1	1	41	1	1	1	1	4	1	1	1	3	1	1	1	3	1	1	1	4	1	4	1	40	24	16	4	4	4	4	4	4	4	4	4	4
1	3	1	0	1	2	1	44	1	1	1	1	2	1	1	2	2	2	1	1	4	1	1	3	4	1	4	1	40	24	16	4	4	4	4	4	4	4	4	4	4
1	3	1	80	5	5	4	44	2	1	2	1	4	1	1	3	2	2	1	1	2	1	2	2	1	2	3	1	40	28	12	5	3	5	3	6	3	4	4	3	4
1	3	1	24	5	3	2	43	2	2	2	1	1	1	4	3	1	2	1	1	3	1	1	2	2	2	1	1	46	28	18	1	7	5	3	7	4	5	5	4	5
1	3	1	12	3	3	2	54	2	2	3	3	2	1	1	2	3	2	2	2	3	2	2	2	3	2	3	1	53	31	22	3	6	4	4	6	6	6	6	6	6
1	3	1	24	3	4	3	43	2	2	2	1	2	1	1	2	3	1	1	1	4	1	1	2	2	1	2	2	37	22	15	3	3	4	4	4	4	4	4	4	3
1	3	1	100	5	5	5	34	1	2	1	1	2	1	1	1	2	1	1	1	2	1	1	1	1	1	3	2	63	40	23	7	6	6	5	7	5	6	7	7	7
1	3	1	0	1	3	2	56	2	2	2	2	3	2	2	2	2	3	2	2	3	2	2	2	3	2	3	2	49	30	19	5	4	5	5	5	5	5	5	5	5
1	3	1	64	5	4	4	53	2	1	2	2	3	1	2	2	3	3	2	2	3	2	1	3	2	1	3	2	53	32	21	6	5	5	5	5	5	5	5	6	6
1	3	1	15	4	5	1	49	3	1	2	1	3	1	1	3	3	2	1	1	4	1	2	1	2	3	3	1	44	27	17	6	6	6	4	2	2	4	5	5	4
1	3	1	8	5	2	1	39	1	1	1	1	3	1	2	2	1	2	1	1	1	1	2	3	4	1	1	1	40	19	21	4	7	4	3	4	4	2	2	7	3
1	3	1	36	4	4	3	44	1	2	2	2	2	2	2	2	1	2	2	1	2	1	2	2	2	2	2	1	59	36	23	6	5	6	6	6	6	6	6	6	6
1	4	1	100	5	5	5	44	1	1	1	1	4	1	1	1	4	1	1	1	4	1	1	1	4	1	4	1	40	24	16	4	4	4	4	4	4	4	4	4	4
1	4	1	16	3	4	2	69	3	3	3	3	2	3	3	3	2	3	3	3	2	3	3	3	2	3	2	3	50	30	20	5	5	5	5	5	5	5	5	5	5
1	4	1	36	4	4	3	35	1	1	1	1	2	1	1	2	2	1	1	1	2	1	2	2	2	1	2	1	48	31	17	5	4	5	4	6	5	5	6	4	4
1	4	1	60	4	4	5	35	2	1	1	1	2	1	2	3	2	1	1	1	1	1	1	2	1	1	2	1	15	9	6	1	2	2	2	2	1	2	1	1	1
1	4	1	80	5	4	5	31	2	1	1	1	1	1	1	1	2	1	1	1	1	1	1	1	2	1	3	1	52	32	20	6	4	6	4	6	6	4	6	6	4
1	4	1	80	5	5	4	34	1	1	1	1	2	1	1	1	2	2	1	1	1	1	1	1	2	2	2	2	60	38	22	7	5	7	5	6	6	6	6	6	6
1	4	1	45	4	5	3	51	2	2	2	2	3	2	2	2	4	1	1	1	4	1	1	1	4	1	4	1	50	30	20	5	5	5	5	5	5	5	5	5	5
1	4	1	18	4	3	2	40	1	1	1	1	1	1	1	2	2	3	1	2	1	1	2	2	3	1	4	1	42	28	14	6	2	3	5	6	3	5	4	4	4
1	4	1	60	4	5	4	33	4	1	3	1	1	1	1	2	1	1	1	1	1	1	1	1	1	1	1	1	56	42	14	7	3	7	7	7	2	7	7	2	7
1	4	1	40	5	2	5	60	3	3	3	2	3	1	3	3	1	2	2	2	2	1	2	2	4	2	4	3	48	26	22	3	7	3	5	6	5	4	5	5	5
1	4	1	30	3	3	5	31	1	1	1	1	1	1	1	1	1	4	1	1	1	1	1	2	1	2	1	1	51	31	20	6	4	5	4	5	7	5	5	5	5
1	1	2	36	4	3	4	38	1	1	1	1	3	1	2	1	2	2	1	1	2	1	1	1	4	1	2	1	28	22	6	4	3	5	1	7	1	1	1	1	4
1	1	2	18	4	3	2	36	1	2	1	1	2	1	1	1	2	1	1	1	1	1	3	1	4	1	2	1	48	40	8	5	1	7	2	7	2	7	7	3	7
1	1	2	12	3	3	2	60	2	2	2	2	3	2	2	3	3	2	2	2	3	2	3	3	3	2	3	2	40	24	16	4	5	4	3	3	4	5	4	4	4
1	1	2	60	5	5	3	44	1	1	1	1	4	1	1	1	4	1	1	1	4	1	1	1	4	1	4	1	10	6	4	1	1	1	1	1	1	1	1	1	1
1	2	2	6	2	2	3	60	2	2	2	2	3	2	3	3	3	2	2	3	3	2	2	2	2	3	3	2	20	12	8	2	2	2	2	2	2	2	2	2	2
1	2	2	32	5	4	2	61	2	2	2	3	3	2	3	2	3	3	3	2	3	3	2	3	2	2	2	2	60	36	24	6	6	6	6	6	6	6	6	6	6
1	2	2	8	3	2	2	30	2	1	3	1	1	1	1	2	1	1	1	1	1	1	1	1	1	1	1	1	44	30	14	7	7	4	1	5	5	5	5	1	4
1	2	2	27	4	3	3	44	1	1	1	1	4	1	1	1	4	1	1	1	4	1	1	1	4	1	4	1	40	24	16	4	4	4	4	4	4	4	4	4	4
1	2	2	0	1	2	2	39	1	1	1	1	2	1	1	1	2	1	1	1	4	1	1	1	4	1	4	1	70	42	28	7	7	7	7	7	7	7	7	7	7
1	2	2	12	3	3	2	40	1	1	1	1	4	1	1	2	2	2	1	1	2	1	1	2	3	1	3	1	52	31	21	6	6	5	5	5	5	5	5	5	5
1	2	2	48	5	3	4	56	2	2	2	2	3	2	2	2	3	2	2	2	3	2	2	1	3	3	3	2	40	24	16	4	4	4	4	4	4	4	4	4	4
1	2	2	9	4	3	1	36	2	2	2	2	2	1	1	1	2	1	1	1	2	1	1	1	2	1	2	1	40	24	16	4	4	4	4	4	4	4	4	4	4
1	2	2	0	1	3	4	34	1	1	1	1	2	1	1	1	2	1	1	1	2	1	1	1	4	1	2	1	50	30	20	5	5	5	5	5	5	5	5	5	5
1	2	2	64	5	4	4	30	1	1	1	1	1	1	1	1	2	1	1	1	1	1	1	1	1	2	2	2	44	31	13	5	2	6	2	6	6	6	3	3	5
1	2	2	30	4	5	2	34	1	1	1	1	2	1	1	1	2	1	1	1	4	1	1	1	2	1	2	1	46	30	16	5	4	5	3	4	5	5	6	4	5
1	2	2	18	4	3	2	46	2	2	2	1	2	1	1	2	3	2	1	1	4	1	1	1	4	1	4	1	51	31	20	6	5	5	5	5	5	5	5	5	5
1	2	2	64	5	4	4	36	3	3	1	1	2	1	1	1	1	1	1	1	4	1	1	1	2	1	1	1	53	31	22	6	7	4	3	4	5	5	6	7	6
1	2	2	48	4	4	4	44	1	1	1	1	4	1	1	1	4	1	1	1	4	1	1	1	4	1	4	1	40	24	16	4	4	4	4	4	4	4	4	4	4
1	2	2	6	3	3	1	45	3	1	1	1	4	1	2	1	2	2	2	1	2	1	1	2	4	2	2	1	50	35	15	7	5	7	5	5	3	6	5	2	5
1	2	2	36	5	3	3	46	2	1	1	1	3	1	1	2	4	1	1	1	4	1	1	2	4	1	4	1	47	29	18	5	4	4	4	5	5	5	5	5	5
1	2	2	48	5	4	3	41	1	1	1	1	4	1	1	1	4	1	1	1	4	1	1	1	4	1	2	1	60	36	24	6	6	6	6	6	6	6	6	6	6
1	2	2	18	4	3	2	51	2	2	2	1	3	2	2	1	3	2	2	2	4	1	1	1	4	3	2	1	50	30	20	5	5	5	5	5	5	5	5	5	5
1	2	2	48	5	3	4	39	2	1	1	1	3	1	1	1	3	1	1	1	1	1	1	1	4	3	2	1	50	30	20	5	5	5	5	5	5	5	5	5	5
1	2	2	48	4	4	4	44	1	1	1	1	4	1	1	1	4	1	1	1	4	1	1	1	4	1	4	1	13	7	6	1	2	1	1	1	1	1	2	2	1
1	2	2	16	5	2	2	56	2	2	2	2	3	2	2	2	3	2	2	2	3	2	2	2	3	2	3	2	32	18	14	3	4	3	3	3	4	3	3	3	3
1	2	2	4	2	2	2	33	1	1	1	1	2	1	1	1	2	1	1	1	2	1	1	1	3	1	2	1	58	36	22	6	6	6	6	6	5	6	6	5	6
1	2	2	12	3	3	2	48	3	1	2	1	3	1	2	2	3	1	2	1	2	1	3	3	2	1	3	1	36	25	11	5	1	3	1	6	4	5	3	5	3
1	2	2	36	4	3	4	45	2	1	2	2	3	1	2	2	3	2	1	1	2	2	1	2	2	1	3	1	48	31	17	5	5	6	7	6	3	6	6	2	2
1	2	2	48	5	3	4	31	2	1	1	1	1	1	1	1	2	1	1	1	2	1	1	1	1	1	3	1	54	33	21	6	6	6	1	6	7	5	5	7	5
1	2	2	0	1	1	1	60	3	2	3	3	2	2	3	3	2	2	3	3	2	2	3	2	2	2	2	2	50	28	22	4	5	5	6	6	6	5	5	5	3
1	2	2	12	5	3	1	36	2	1	1	1	2	1	1	1	2	2	2	1	2	1	1	1	2	2	2	1	62	37	25	7	7	7	7	7	6	5	5	5	6
1	2	2	12	5	3	1	54	2	2	2	2	3	1	1	2	3	2	2	2	3	2	2	2	3	2	3	2	40	23	17	4	4	5	5	4	5	4	3	3	3
1	2	2	18	4	3	2	35	1	1	1	1	2	1	1	2	2	1	1	1	4	1	1	1	2	1	2	1	60	36	24	6	6	6	6	6	6	6	6	6	6
1	2	2	6	3	3	1	44	2	1	2	1	4	1	1	2	3	2	1	1	2	1	1	2	3	1	3	1	41	27	14	4	3	4	3	5	3	5	4	5	5
1	2	2	32	5	4	2	41	1	1	1	1	2	1	1	2	2	2	1	1	2	3	2	2	2	2	2	2	44	29	15	5	5	5	2	5	4	5	5	4	4
1	2	2	3	2	3	1	36	2	1	1	1	3	1	1	1	2	2	1	1	3	1	1	1	2	1	2	1	35	27	8	5	2	5	2	5	2	5	5	2	2
1	2	2	18	4	3	2	51	2	2	2	2	4	1	1	2	2	2	2	2	3	2	1	2	2	2	3	2	49	29	20	4	5	5	5	5	5	5	5	5	5
1	2	2	48	5	3	4	49	2	2	2	2	3	1	2	2	3	1	2	1	2	1	1	2	3	2	3	2	41	24	17	4	5	4	4	4	4	4	4	4	4
1	2	2	36	4	3	4	36	1	1	1	1	4	1	1	1	2	1	1	1	2	1	1	2	2	2	2	1	56	34	22	5	5	5	5	6	6	6	6	6	6
1	2	2	64	5	4	4	31	1	1	1	1	2	1	1	1	2	3	1	1	1	1	1	1	1	2	1	1	46	42	4	7	1	7	1	7	1	7	7	1	7
1	2	2	32	5	2	4	38	1	1	1	1	1	1	2	2	1	2	1	1	2	2	2	2	1	2	3	1	62	38	24	7	4	4	6	6	7	7	7	7	7
1	2	2	0	1	2	1	29	1	1	1	1	2	1	1	1	1	1	1	1	1	1	1	1	2	1	2	1	53	32	21	4	4	4	5	6	6	6	6	6	6
1	2	2	0	1	2	1	54	3	2	1	2	3	2	2	2	2	2	2	1	3	3	2	2	3	1	3	2	37	23	14	3	5	3	3	5	3	5	4	3	3
1	2	2	9	2	3	3	38	2	1	1	1	2	1	1	2	2	2	2	1	2	1	1	1	2	2	2	1	49	30	19	5	4	5	5	5	5	5	5	5	5
1	2	2	12	3	3	2	35	1	1	1	1	4	1	1	1	2	1	1	1	1	1	1	2	2	1	3	1	56	35	21	5	5	6	5	7	5	5	6	6	6
1	2	2	6	3	3	1	59	3	2	3	2	3	2	2	2	3	2	2	2	3	2	2	2	3	2	3	2	50	28	22	5	6	4	6	5	5	5	4	5	5
1	2	2	12	3	3	2	53	2	2	2	2	3	1	2	2	2	2	2	1	2	2	3	2	4	2	2	2	45	26	19	5	6	4	4	5	5	4	4	4	4
1	2	2	100	5	5	5	31	3	1	1	2	2	1	1	1	2	1	1	1	1	1	1	1	1	1	1	1	53	32	21	2	5	6	6	6	4	6	6	6	6
1	2	2	24	3	3	4	46	2	1	1	1	4	1	2	1	4	1	1	1	4	1	1	2	4	1	3	1	40	23	17	4	5	3	4	4	4	4	4	4	4
1	2	2	0	1	1	1	64	1	2	3	4	2	2	1	2	2	4	3	2	4	2	3	4	2	2	4	2	70	42	28	7	7	7	7	7	7	7	7	7	7
1	2	2	0	1	1	1	44	1	1	1	1	4	1	1	1	4	1	1	1	4	1	1	1	4	1	4	1	10	6	4	1	1	1	1	1	1	1	1	1	1
1	3	2	64	5	4	4	31	1	1	1	1	2	1	1	1	2	1	1	1	2	1	1	1	2	1	2	1	58	37	21	6	6	7	3	6	6	6	6	6	6
1	3	2	32	5	4	2	66	3	3	3	3	3	3	2	3	2	3	3	3	1	3	2	3	3	2	2	3	70	42	28	7	7	7	7	7	7	7	7	7	7
1	3	2	100	5	5	5	81	4	4	4	4	1	4	4	4	1	4	4	4	1	4	4	4	1	4	1	4	66	42	24	7	3	7	7	7	7	7	7	7	7
1	3	2	36	4	4	3	35	1	1	1	1	2	1	1	1	2	2	1	1	2	2	1	1	2	2	2	1	49	30	19	5	4	5	5	5	5	5	5	5	5
1	3	2	50	3	5	5	35	1	1	1	1	4	1	1	1	2	1	1	1	4	1	1	1	1	1	2	1	38	23	15	4	4	4	4	3	2	4	5	5	3
1	3	2	4	2	2	2	56	2	2	2	2	3	2	2	2	3	2	2	2	3	2	2	2	3	2	3	2	20	12	8	2	2	2	2	2	2	2	2	2	2
1	3	2	80	5	5	4	38	1	1	2	2	2	1	1	1	2	2	2	2	1	2	1	1	2	1	2	1	49	34	15	7	4	5	2	7	5	5	6	4	4
1	3	2	64	5	4	4	38	1	1	1	1	2	1	2	2	1	1	1	1	4	1	1	1	3	2	2	1	64	39	25	6	6	7	6	7	6	7	6	7	6
1	3	2	100	5	5	5	49	3	2	2	1	2	1	2	2	2	3	2	2	1	1	1	2	3	2	4	1	60	36	24	6	6	6	6	6	6	6	6	6	6
1	4	2	8	5	2	1	69	3	3	3	3	2	3	3	3	2	3	3	3	2	3	3	3	2	3	2	3	60	36	24	6	6	6	6	6	6	6	6	6	6
1	4	2	80	5	4	5	29	1	1	1	1	3	1	1	1	1	1	1	1	1	1	1	1	1	1	2	1	69	42	27	7	6	7	7	7	7	7	7	7	7
1	4	2	2	2	2	1	60	3	3	3	3	3	2	2	2	3	2	2	2	3	2	2	2	2	3	2	2	52	34	18	5	5	5	1	6	6	6	6	6	6
1	1	1	36	4	3	4	35	1	1	1	1	1	1	1	1	2	2	2	1	1	2	2	2	2	1	2	1	44	30	14	6	5	5	1	4	5	5	5	3	5
1	1	1	64	5	4	4	40	1	1	1	1	3	1	1	2	4	1	1	1	4	1	1	2	1	3	1	1	43	28	15	7	3	4	4	5	4	4	4	4	4
1	1	1	12	3	3	2	35	2	2	2	1	2	1	1	1	1	2	1	1	1	1	1	1	2	2	2	1	60	40	20	7	3	5	5	7	7	7	7	5	7
1	1	1	4	2	2	2	31	1	1	1	1	3	1	1	1	2	1	1	1	2	1	1	1	2	1	1	1	40	24	16	4	4	4	4	4	4	4	4	4	4
1	1	1	48	5	3	4	58	2	4	2	1	4	2	2	3	3	2	4	2	1	1	1	3	2	1	4	2	60	37	23	7	7	5	7	7	5	7	5	4	6
1	1	1	6	2	3	2	33	1	1	1	1	3	1	1	1	2	2	1	1	1	1	1	1	2	1	2	1	50	30	20	5	5	5	5	5	5	5	5	5	5
1	1	1	64	5	4	4	29	1	1	1	1	2	1	1	1	3	1	1	1	1	1	1	1	1	1	1	1	50	40	10	7	1	7	2	7	1	7	6	6	6
1	1	1	48	4	4	4	31	1	1	1	1	1	1	1	2	2	2	2	1	1	1	1	2	1	1	1	1	52	37	15	6	2	5	3	7	4	6	6	6	7
1	2	1	48	5	3	4	41	2	2	2	1	2	2	1	1	2	2	1	1	2	1	1	2	3	2	2	1	51	32	19	7	4	5	5	5	5	5	5	5	5
1	2	1	24	3	3	4	44	1	1	1	1	4	1	1	1	4	1	1	1	4	1	1	1	4	1	4	1	70	42	28	7	7	7	7	7	7	7	7	7	7
1	2	1	18	3	3	3	48	1	2	1	1	2	1	2	2	3	2	1	1	4	2	1	1	4	3	3	1	53	32	21	6	4	4	5	5	7	6	6	5	5
1	2	1	64	5	4	4	48	2	3	2	1	2	1	3	3	4	2	1	1	1	1	1	2	3	1	3	1	51	33	18	6	4	5	5	6	4	5	5	5	6
1	2	1	15	4	5	1	45	2	1	3	2	3	1	2	4	1	2	2	1	1	1	3	2	2	1	1	1	46	25	21	4	6	2	6	5	3	5	5	6	4
1	2	1	6	3	3	1	56	2	2	2	2	3	2	2	2	3	2	2	2	3	2	2	2	3	2	3	2	40	24	16	4	4	4	4	4	4	4	4	4	4
1	2	1	18	4	3	2	45	2	2	2	1	4	1	1	1	1	1	1	2	4	1	1	2	4	1	2	2	61	37	24	6	6	6	6	7	6	6	7	6	5
1	2	1	16	5	2	2	56	2	2	2	2	3	2	2	2	3	2	2	2	3	2	2	2	3	2	3	2	30	18	12	3	3	3	3	3	3	3	3	3	3
1	2	1	24	5	3	2	41	2	1	2	1	3	1	1	1	2	1	1	2	1	1	2	2	4	1	3	1	31	19	12	2	3	4	3	3	3	3	3	3	4
1	2	1	12	5	3	1	51	3	2	3	1	3	2	2	1	3	3	2	3	1	1	2	1	2	2	2	2	40	24	16	4	4	4	4	4	4	4	4	4	4
1	2	1	80	5	5	4	29	1	1	1	1	1	1	1	1	2	1	1	1	2	1	1	1	2	1	1	1	59	38	21	7	6	6	6	6	4	7	7	5	5
1	2	1	8	2	4	2	49	4	4	1	1	1	2	1	2	1	3	2	1	1	2	2	3	3	2	2	1	53	40	13	6	1	6	3	7	2	7	7	7	7
1	2	1	12	3	3	2	48	3	3	3	3	4	1	1	1	4	1	1	1	1	1	1	1	4	1	2	1	50	30	20	5	5	5	5	5	5	5	5	5	5
1	2	1	48	5	3	4	33	1	1	1	1	4	1	1	1	2	1	1	1	1	1	1	1	3	1	1	1	46	31	15	6	4	6	4	7	3	4	4	4	4
1	2	1	48	4	4	4	53	2	2	2	2	3	2	2	2	3	2	2	2	4	1	1	1	3	1	4	1	47	28	19	4	4	5	5	5	5	4	5	5	5
1	2	1	48	5	3	4	33	1	1	1	1	2	1	1	1	2	1	1	1	4	1	1	1	2	1	1	1	51	34	17	7	5	7	4	5	2	5	5	6	5
1	2	1	48	5	3	4	36	1	1	1	1	2	1	1	1	3	1	1	1	4	1	1	1	4	1	1	1	54	34	20	7	3	3	3	3	7	7	7	7	7
1	2	1	6	2	3	2	38	1	1	1	1	3	1	1	1	3	1	1	1	3	1	1	2	2	1	3	1	52	33	19	6	6	6	4	4	5	6	6	4	5
1	2	1	24	5	3	2	33	1	1	1	1	3	1	1	1	2	1	1	1	2	1	1	1	2	2	1	1	41	30	11	4	3	5	2	6	3	5	5	3	5
1	2	1	48	4	4	4	60	2	3	2	3	3	2	3	2	2	2	3	3	3	3	2	1	2	2	2	3	37	22	15	4	4	3	3	4	4	3	4	4	4
1	2	1	36	5	3	3	38	2	1	1	1	3	1	1	1	3	1	1	1	2	1	1	1	4	1	2	1	61	39	22	7	7	7	7	7	4	7	7	4	4
1	2	1	24	5	3	2	36	2	1	1	1	3	1	1	1	2	1	1	1	4	1	1	1	1	1	2	2	46	20	26	2	6	4	7	4	6	2	2	7	6
1	2	1	12	3	3	2	35	1	1	1	1	1	1	2	2	2	2	1	1	2	1	1	1	3	1	2	1	42	28	14	4	3	5	3	5	5	5	5	3	4
1	2	1	32	5	4	2	39	2	1	2	1	3	1	1	1	3	1	1	1	2	1	1	1	2	2	3	1	43	25	18	4	5	5	3	4	5	4	4	5	4
1	2	1	8	3	2	2	56	2	2	2	2	3	2	2	2	3	2	2	2	3	2	2	2	3	2	3	2	48	30	18	5	5	5	3	5	5	5	5	5	5
1	2	1	24	5	3	2	38	2	1	1	1	3	4	1	3	2	1	1	1	1	1	1	2	1	1	1	1	47	31	16	5	4	5	5	6	3	5	5	4	5
1	2	1	6	3	3	1	56	2	2	2	2	3	2	2	2	3	2	2	2	3	2	2	2	3	2	3	2	40	24	16	4	4	4	4	4	4	4	4	4	4
1	2	1	24	4	2	4	39	2	2	2	1	2	1	1	2	3	1	2	1	2	1	1	1	2	1	2	1	48	29	19	5	5	5	5	5	4	5	4	5	5
1	2	1	64	5	4	4	56	2	2	2	2	3	2	2	2	3	2	2	2	3	2	2	2	3	2	3	2	41	24	17	3	5	5	4	4	4	4	4	4	4
1	2	1	36	4	3	4	69	3	3	3	3	2	3	3	3	2	3	3	3	2	3	3	3	2	3	2	3	57	33	24	5	7	4	5	6	6	6	6	6	6
1	2	1	48	5	3	4	43	2	2	2	2	2	2	1	1	2	2	1	1	2	1	1	1	4	1	2	2	54	42	12	7	1	7	4	7	1	7	7	6	7
1	2	1	24	5	3	2	69	3	3	3	3	2	3	3	3	2	3	3	3	2	3	3	3	2	3	2	3	50	30	20	5	5	5	5	5	5	5	5	5	5
1	2	1	18	4	3	2	45	2	1	2	1	3	1	1	2	3	1	1	1	4	1	1	1	4	2	3	1	50	30	20	5	5	5	5	5	5	5	5	5	5
1	2	1	12	4	4	1	55	2	3	3	2	4	1	1	1	1	2	2	1	4	3	2	2	3	2	3	2	50	30	20	2	4	4	4	6	6	6	6	6	6
1	2	1	32	5	4	2	56	2	2	2	2	3	2	2	2	3	2	2	2	3	2	2	2	3	2	3	2	40	24	16	4	4	4	4	4	4	4	4	4	4
1	2	1	6	2	3	2	66	2	3	3	3	4	3	3	2	2	2	3	4	2	3	1	2	2	3	3	3	43	26	17	5	5	5	4	4	4	4	4	4	4
1	2	1	9	4	3	1	45	1	1	1	3	4	1	1	1	3	1	1	1	4	1	1	1	3	1	4	2	40	24	16	4	4	4	4	4	4	4	4	4	4
1	2	1	8	5	2	1	35	2	2	1	1	4	1	1	1	2	2	1	1	1	1	1	1	2	1	1	1	38	22	16	4	5	3	4	3	3	3	5	4	4
1	2	1	8	5	2	1	33	1	1	1	1	1	1	1	1	1	1	1	1	1	1	1	1	4	4	1	1	40	18	22	7	7	7	1	1	7	1	1	7	1
1	2	1	12	4	2	2	45	3	2	3	1	4	1	1	1	2	1	1	1	2	1	1	1	3	2	3	2	50	30	20	5	5	5	5	5	5	5	5	5	5
1	2	1	9	4	3	1	41	2	1	2	1	3	1	2	2	2	1	2	1	2	1	1	2	3	1	2	1	53	30	23	4	5	4	6	6	6	6	5	6	5
1	2	1	24	5	3	2	31	1	1	1	1	4	1	1	1	1	2	1	1	1	1	1	1	2	1	1	1	54	42	12	7	1	7	6	7	1	7	7	4	7
1	2	1	6	3	3	1	56	2	2	2	2	3	2	2	2	3	3	2	2	3	2	2	2	3	1	3	2	40	24	16	4	4	4	4	4	4	4	4	4	4
1	2	1	9	4	3	1	38	1	1	2	1	3	1	3	3	2	1	1	1	1	1	1	2	1	1	2	1	53	40	13	7	4	7	1	7	4	7	7	4	5
1	2	1	36	4	3	4	49	1	1	2	2	3	2	2	2	3	2	2	1	3	1	2	1	4	2	2	1	40	24	16	4	4	4	4	4	4	4	4	4	4
1	2	1	16	5	2	2	31	1	1	1	1	1	1	1	2	2	1	1	1	2	1	1	1	2	1	2	1	44	32	12	6	6	6	2	6	2	6	6	2	2
1	2	1	24	4	4	2	40	3	1	1	1	1	1	1	1	3	2	1	1	1	1	1	1	4	1	4	2	66	40	26	5	7	7	7	7	7	7	7	5	7
1	2	1	48	5	4	3	33	1	1	1	1	1	2	2	2	1	1	1	1	1	1	2	1	2	2	1	1	40	24	16	4	4	4	4	4	4	4	4	4	4
1	2	1	2	2	2	1	40	2	1	2	1	2	1	1	1	3	1	1	1	3	1	2	1	3	1	3	1	48	29	19	4	5	5	4	4	5	5	5	5	6
1	2	1	8	3	2	2	46	3	2	2	2	3	1	1	1	2	2	3	1	2	1	1	1	2	2	3	2	59	35	24	6	6	6	6	6	6	6	6	6	5
1	2	1	10	3	5	1	58	2	1	3	1	3	1	1	4	2	2	2	1	2	2	4	4	4	1	4	2	54	35	19	5	4	6	5	7	6	6	6	4	5
1	2	1	4	3	2	1	56	2	2	2	2	3	2	2	2	3	2	2	2	3	2	2	2	3	2	3	2	52	32	20	7	5	5	5	5	5	5	5	5	5
1	2	1	16	3	4	2	41	2	1	2	1	2	1	2	2	2	1	1	1	3	1	2	1	2	1	3	2	56	34	22	5	5	5	5	6	6	7	5	6	6
1	2	1	80	5	5	4	29	1	1	1	1	4	1	1	1	1	1	1	1	1	1	1	1	1	1	1	1	70	42	28	7	7	7	7	7	7	7	7	7	7
1	2	1	0	1	4	3	56	2	2	2	2	3	2	2	2	3	2	2	2	3	2	2	2	3	2	3	2	30	18	12	3	3	3	3	3	3	3	3	3	3
1	2	1	27	4	3	3	58	2	2	2	1	2	3	3	3	2	2	3	3	3	2	1	3	3	2	3	1	56	35	21	5	4	5	5	7	6	6	6	6	6
1	2	1	6	2	3	2	34	3	1	2	1	2	1	1	1	2	1	1	1	2	1	2	1	1	1	1	1	68	42	26	7	5	7	7	7	7	7	7	7	7
1	3	1	0	1	3	1	69	3	3	3	3	2	3	3	3	2	3	3	3	2	3	3	3	2	3	2	3	50	30	20	5	5	5	5	5	5	5	5	5	5
1	3	1	48	5	3	4	40	2	1	1	1	2	1	1	2	3	2	1	1	1	1	1	2	3	1	3	2	60	36	24	6	6	6	6	6	6	6	6	6	6
1	3	1	32	5	4	2	44	1	1	1	1	4	1	1	1	4	1	1	1	4	1	1	1	4	1	4	1	40	24	16	4	4	4	4	4	4	4	4	4	4
1	3	1	12	3	3	2	25	1	1	1	1	1	1	1	1	1	1	1	1	1	1	1	1	1	1	1	1	50	42	8	7	2	7	2	7	2	7	7	2	7
1	3	1	36	4	4	3	41	1	1	1	1	4	1	1	1	3	1	1	1	2	1	1	3	2	3	3	1	45	28	17	5	4	3	5	5	3	5	5	5	5
1	3	1	1	2	1	1	54	3	2	3	2	4	2	1	1	3	2	3	3	3	1	1	2	4	1	1	1	43	26	17	4	5	5	3	5	4	3	4	5	5
1	3	1	18	4	3	2	36	1	1	1	1	2	2	1	1	4	1	1	1	1	1	2	2	2	2	1	1	70	42	28	7	7	7	7	7	7	7	7	7	7
1	2	2	80	5	4	5	25	1	1	1	1	1	1	1	1	1	1	1	1	1	1	1	1	1	1	1	1	70	42	28	7	7	7	7	7	7	7	7	7	7
1	2	2	64	5	4	4	35	1	1	1	1	1	1	2	3	2	1	1	1	1	1	1	1	3	1	2	2	47	31	16	5	4	6	3	5	5	5	5	4	5
1	2	2	32	3	4	4	50	2	2	3	2	4	2	1	2	4	2	2	1	1	1	1	1	3	1	3	2	46	29	17	2	6	5	1	7	5	5	5	5	5
1	2	2	36	5	3	3	56	2	2	2	2	3	2	2	2	3	2	2	2	3	2	2	2	3	2	3	2	43	26	17	6	5	4	4	4	4	4	4	4	4
1	2	2	2	2	2	1	55	2	2	2	2	3	2	2	2	3	2	2	2	2	2	3	2	2	2	3	2	50	30	20	5	5	5	5	5	5	5	5	5	5
1	2	2	80	5	5	4	38	1	1	1	1	2	1	4	2	2	2	2	1	1	1	1	1	1	1	3	1	50	33	17	7	5	5	1	7	6	5	4	5	5
1	2	2	36	5	3	3	55	2	2	1	2	3	2	2	2	3	2	2	2	3	2	2	2	3	2	3	2	40	24	16	4	4	4	4	4	4	4	4	4	4
1	2	2	64	5	4	4	41	2	1	1	1	2	1	1	1	3	1	1	1	4	1	1	1	4	1	4	1	50	30	20	5	5	5	5	5	5	5	5	5	5
1	2	2	64	5	4	4	33	1	1	1	1	1	1	1	1	1	1	1	1	4	1	1	1	4	1	1	1	40	24	16	4	4	4	4	4	4	4	4	4	4
1	2	2	32	5	2	4	33	1	1	1	1	2	1	1	1	2	1	1	1	4	1	1	1	2	1	1	1	43	35	8	5	5	5	1	7	1	6	6	1	6
1	2	2	15	4	5	1	36	1	1	1	1	3	1	1	1	3	1	1	1	1	1	1	1	3	2	3	1	46	27	19	4	5	4	5	6	4	4	5	5	4
1	2	2	48	5	3	4	69	3	3	3	3	2	3	3	3	2	3	3	3	2	3	3	3	2	3	2	3	50	30	20	5	5	5	5	5	5	5	5	5	5
1	2	2	27	4	3	3	60	3	2	3	2	2	2	3	2	2	3	2	2	3	3	2	3	3	2	2	2	33	19	14	2	4	3	3	3	4	3	4	3	4
1	2	2	24	5	3	2	33	1	1	2	1	2	1	1	1	2	1	1	1	2	1	1	1	2	1	2	1	60	36	24	6	6	6	6	6	6	6	6	6	6
1	2	2	45	4	5	3	44	1	1	1	1	4	1	1	1	4	1	1	1	4	1	1	1	4	1	4	1	40	24	16	4	4	4	4	4	4	4	4	4	4
1	2	2	64	5	4	4	81	4	4	4	4	1	4	4	4	1	4	4	4	1	4	4	4	1	4	1	4	70	42	28	7	7	7	7	7	7	7	7	7	7
1	2	2	9	2	3	3	39	2	2	1	1	2	2	1	2	2	1	1	1	2	2	1	1	3	1	2	1	37	29	8	5	3	5	2	4	2	5	5	1	5
1	2	2	16	5	4	1	31	1	1	1	1	1	1	1	1	1	1	1	1	1	2	1	1	3	2	1	2	53	35	18	7	4	7	6	6	4	5	6	4	4
1	2	2	9	2	3	3	66	3	3	3	3	2	3	3	3	2	3	3	3	3	2	2	2	3	2	3	2	50	30	20	5	5	5	5	5	5	5	5	5	5
1	2	2	32	5	4	2	34	1	1	1	1	1	1	1	1	2	1	1	1	4	1	1	1	3	1	2	1	44	27	17	4	4	5	3	4	5	6	4	5	4
1	2	2	36	4	4	3	41	2	1	2	1	2	1	1	1	2	2	1	1	3	1	1	2	2	2	3	2	45	29	16	3	2	6	4	5	5	4	6	5	5
1	2	2	16	5	2	2	34	1	1	1	1	2	1	1	1	1	1	1	1	4	1	1	1	1	4	1	1	61	36	25	6	7	6	6	6	6	6	6	6	6
1	2	2	48	5	4	3	34	1	1	1	1	2	1	1	1	1	1	1	1	1	1	2	2	2	1	3	2	48	31	17	5	7	6	4	6	4	5	3	2	6
1	2	2	6	3	3	1	61	3	2	3	3	2	3	2	3	2	3	2	2	2	2	3	3	2	2	2	3	61	38	23	7	7	7	5	7	6	6	5	5	6
1	2	2	36	4	4	3	69	3	3	3	3	2	3	3	3	2	3	3	3	2	3	3	3	2	3	2	3	60	36	24	6	6	6	6	6	6	6	6	6	6
1	2	2	64	5	4	4	39	2	1	1	1	1	2	2	2	2	2	2	1	2	1	1	1	2	1	3	1	51	28	23	5	7	4	6	6	6	6	4	4	3
1	2	2	8	2	4	2	63	3	3	3	2	3	3	2	3	3	3	2	2	2	2	2	3	3	1	3	2	59	36	23	6	6	6	6	6	5	6	6	6	6
1	2	2	12	3	3	2	54	2	2	2	2	3	2	2	2	2	2	2	2	2	2	3	2	2	3	2	2	49	31	18	5	5	5	5	6	4	5	5	4	5
1	2	2	27	4	3	3	38	1	1	1	1	4	1	1	1	2	1	1	1	2	1	1	1	3	1	4	1	40	24	16	4	4	4	4	4	4	4	4	4	4
1	2	2	48	5	3	4	35	1	1	1	1	2	1	1	2	2	2	1	1	1	2	1	3	1	2	1	1	47	29	18	4	4	4	4	5	4	6	5	6	5
1	2	2	18	4	3	2	31	2	1	1	1	2	1	1	1	1	1	1	1	1	1	1	2	2	2	1	1	61	36	25	7	7	5	7	5	6	7	5	5	7
1	2	2	24	5	3	2	41	2	1	1	1	2	1	1	1	4	1	1	1	4	1	1	2	3	2	2	1	50	31	19	6	5	5	5	5	4	5	5	5	5
1	2	2	18	4	3	2	46	2	1	2	1	4	1	1	1	4	1	1	1	2	1	2	2	3	3	3	1	64	38	26	6	5	6	7	6	7	7	6	7	7
1	2	2	12	3	3	2	44	1	1	1	1	4	1	1	1	4	1	1	1	4	1	1	1	4	1	4	1	50	30	20	5	5	5	5	5	5	5	5	5	5
1	2	2	8	3	2	2	44	1	1	1	1	4	1	1	1	4	1	1	1	4	1	1	1	4	1	4	1	50	30	20	5	5	5	5	5	5	5	5	5	5
1	2	2	24	4	4	2	29	1	1	1	1	1	1	1	1	1	1	1	1	4	1	1	1	1	1	1	1	52	42	10	7	1	7	7	7	1	7	7	1	7
1	2	2	12	3	3	2	56	2	2	2	2	3	2	2	2	3	2	2	2	3	2	2	2	3	2	3	2	24	15	9	3	1	2	3	2	2	3	2	3	3
1	2	2	0	1	3	1	38	1	1	1	1	2	1	1	2	4	1	1	1	2	1	1	1	4	1	2	1	49	30	19	4	5	5	4	6	5	5	5	5	5
1	2	2	0	1	2	1	60	3	2	2	3	2	2	2	3	2	2	2	2	2	3	3	3	2	3	2	3	46	27	19	4	5	4	4	5	5	4	5	5	5
1	2	2	8	2	4	2	40	2	1	1	1	2	1	1	3	3	1	1	1	2	1	1	2	2	1	3	2	46	30	16	5	4	6	4	4	4	5	5	4	5
1	2	2	18	4	3	2	43	2	2	2	2	3	1	3	2	2	1	1	1	2	1	1	1	1	2	3	1	51	30	21	5	5	5	6	5	5	5	5	5	5
1	2	2	6	3	3	1	43	1	1	1	1	3	1	1	1	4	1	1	1	4	1	1	1	4	1	4	1	54	32	22	3	5	4	5	7	7	7	7	5	4
1	2	2	12	3	3	2	35	1	1	1	1	2	1	2	2	2	1	1	1	2	1	1	1	1	3	1	2	50	30	20	5	5	5	5	5	5	5	5	5	5
1	2	2	9	4	3	1	45	1	1	1	1	4	1	1	2	3	1	1	1	4	2	2	1	3	1	4	1	35	21	14	3	3	3	3	4	4	4	3	4	4
1	2	2	8	5	2	1	61	2	2	2	2	3	3	2	2	3	3	3	2	3	2	2	2	3	3	3	2	50	30	20	5	5	5	5	5	5	5	5	5	5
1	2	2	4	3	2	1	69	4	4	4	1	1	4	1	3	1	4	4	3	1	1	3	1	4	4	4	3	55	27	28	1	7	4	7	1	7	7	7	7	7
1	2	2	16	5	2	2	56	2	2	2	2	3	2	2	2	3	2	2	2	3	2	2	2	3	2	3	2	30	18	12	3	3	3	3	3	3	3	3	3	3
1	2	2	12	4	4	1	56	2	2	2	2	3	2	2	2	3	2	2	2	3	2	2	2	3	2	3	2	40	24	16	4	4	4	4	4	4	4	4	4	4
1	3	2	100	5	5	5	70	4	3	4	3	1	3	4	4	2	4	3	4	4	1	1	1	3	2	3	2	47	28	19	5	5	5	5	5	4	5	4	5	4
1	3	2	6	2	3	2	26	1	1	1	1	1	1	1	1	1	1	1	1	1	1	1	1	1	1	2	1	57	35	22	5	5	5	4	7	7	6	6	6	6
1	3	2	48	5	3	4	46	1	1	1	1	4	1	2	2	4	1	1	1	4	1	1	1	4	1	4	1	58	37	21	4	3	6	5	7	7	7	7	6	6
1	3	2	18	4	3	2	44	1	1	2	1	4	1	1	1	3	1	1	1	4	1	1	1	4	1	4	1	46	28	18	5	6	7	4	4	4	4	4	4	4
1	3	2	45	4	5	3	35	2	1	1	1	2	1	2	1	2	1	1	1	2	1	1	1	3	1	2	1	50	30	20	5	5	5	5	5	5	5	5	5	5
1	3	2	50	3	5	5	56	2	2	2	2	3	2	2	2	3	2	2	2	3	2	2	2	3	2	3	2	40	24	16	4	4	4	4	4	4	4	4	4	4
1	3	2	2	2	2	1	58	2	2	2	2	2	2	2	3	3	3	2	2	2	2	3	2	3	2	3	2	20	12	8	2	2	2	2	2	2	2	2	2	2
1	3	2	0	1	1	1	44	1	1	1	1	4	1	1	1	4	1	1	1	4	1	1	1	4	1	4	1	39	23	16	4	4	4	4	4	4	4	4	4	3
1	3	2	4	3	1	2	54	2	2	1	2	2	2	2	1	3	2	2	2	4	2	2	2	3	2	3	2	48	32	16	5	1	5	5	6	5	6	5	5	5
1	4	2	18	3	3	3	44	1	1	1	1	4	1	1	1	4	1	1	1	4	1	1	1	4	1	4	1	58	34	24	6	6	6	6	6	6	6	6	6	4
1	4	2	3	2	3	1	46	3	1	2	2	2	1	3	1	3	3	1	1	2	1	1	1	3	1	4	1	54	34	20	4	6	6	6	6	6	6	6	2	6
2	2	1	9	4	3	1	56	2	2	2	2	3	2	2	2	3	2	2	2	3	2	2	2	3	2	3	2	42	26	16	6	4	4	4	4	4	4	4	4	4
2	2	1	8	3	2	2	34	1	1	2	1	3	1	1	1	2	1	1	1	1	1	1	1	2	1	3	1	47	35	12	6	2	6	5	6	3	5	6	2	6
2	2	1	8	3	2	2	45	2	1	3	1	2	1	1	2	3	1	1	1	4	1	1	2	4	2	2	1	22	12	10	2	3	2	2	2	2	2	2	3	2
2	2	1	48	5	3	4	33	1	1	1	1	4	1	1	1	1	1	1	1	1	1	1	1	4	1	1	1	51	37	14	6	4	6	4	7	2	6	6	4	6
2	2	2	1	2	1	1	50	3	2	2	1	3	3	2	2	3	2	1	1	2	1	1	3	3	1	3	1	41	25	16	5	3	4	5	4	5	4	4	3	4
2	2	2	8	3	2	2	40	2	1	1	1	3	1	1	1	2	1	1	1	2	1	2	1	3	2	3	2	30	18	12	3	3	3	3	3	3	3	3	3	3
2	3	2	24	4	4	2	60	2	2	2	1	2	2	3	3	3	2	2	2	3	2	3	3	4	2	4	1	44	31	13	5	2	5	3	5	3	5	6	5	5
2	1	1	80	5	4	5	43	1	1	2	2	4	2	1	2	1	1	1	2	1	1	1	2	4	1	3	1	62	34	28	5	7	5	7	7	7	5	7	7	5
2	1	1	64	5	4	4	54	3	3	3	2	2	1	3	2	3	1	1	1	4	1	4	1	4	1	2	1	33	27	6	4	3	4	1	5	1	3	5	1	6
2	1	1	6	3	3	1	38	2	1	1	1	3	1	2	2	2	1	1	1	2	1	1	1	3	1	2	1	50	31	19	6	5	5	6	5	4	5	5	4	5
2	1	1	2	2	2	1	41	1	1	1	1	3	1	1	2	3	1	1	1	2	1	2	1	4	1	4	1	44	29	15	5	4	4	3	5	3	5	5	5	5
2	1	1	27	4	3	3	45	3	2	2	1	2	1	2	1	2	2	1	1	2	1	2	2	4	3	1	1	46	34	12	6	3	6	4	6	2	5	5	3	6
2	1	1	12	3	3	2	34	2	1	1	1	2	1	1	1	2	1	1	1	2	1	1	2	2	1	2	1	48	36	12	6	3	6	3	6	3	6	6	3	6
2	1	1	4	3	2	1	43	2	2	3	2	3	1	1	1	3	1	1	1	2	1	1	1	3	1	2	2	54	34	20	5	5	6	4	6	6	6	5	5	6
2	1	1	0	1	1	1	66	2	3	3	2	2	3	3	3	3	3	3	3	2	3	3	3	1	3	2	3	48	32	16	7	1	5	5	5	5	5	5	5	5
2	2	1	12	3	3	2	39	1	1	1	1	2	1	2	1	3	1	1	1	4	1	2	1	4	1	1	1	50	32	18	5	4	6	6	6	4	5	5	4	5
2	2	1	12	5	1	3	56	2	2	2	2	3	2	2	2	3	2	2	2	3	2	2	2	3	2	3	2	30	18	12	3	3	3	3	3	3	3	3	3	3
2	2	1	0	1	1	1	44	1	1	1	1	4	1	1	1	4	1	1	1	4	1	1	1	4	1	4	1	40	24	16	4	4	4	4	4	4	4	4	4	4
2	2	1	60	5	3	5	34	2	1	1	1	4	1	1	1	2	1	1	1	1	1	1	1	2	1	2	1	51	31	20	4	5	3	4	7	6	7	5	5	5
2	2	1	36	4	4	3	56	2	2	2	2	3	2	2	2	3	2	2	2	3	2	2	2	3	2	3	2	40	24	16	4	4	4	4	4	4	4	4	4	4
2	2	1	10	3	5	1	40	1	1	1	1	2	1	1	2	1	1	1	1	1	4	2	2	3	1	4	1	40	24	16	4	4	4	4	4	4	4	4	4	4
2	2	1	60	4	5	4	53	1	1	4	4	3	2	3	1	4	2	4	3	1	1	1	1	1	1	2	2	32	20	12	2	3	2	3	3	3	5	4	3	4
2	2	1	2	2	2	1	50	2	2	2	2	3	1	1	2	3	2	2	1	1	1	2	2	4	1	4	2	38	26	12	4	2	5	4	5	3	4	5	3	3
2	2	1	18	4	3	2	56	2	2	2	2	3	2	2	2	3	2	2	2	3	2	2	2	3	2	3	2	47	29	18	5	4	4	4	5	5	5	5	5	5
2	2	1	12	5	3	1	44	1	1	1	1	4	1	1	1	4	1	1	1	4	1	1	1	4	1	4	1	40	24	16	4	4	4	4	4	4	4	4	4	4
2	2	1	18	4	3	2	29	1	1	1	1	1	1	1	1	1	1	1	1	1	1	1	1	4	1	1	1	41	27	14	5	4	4	4	6	3	4	4	3	4
2	2	1	6	4	2	1	65	3	2	3	3	2	3	2	3	2	3	3	3	2	2	3	3	2	3	2	3	52	30	22	5	7	5	5	5	5	5	5	5	5
2	2	1	6	4	2	1	41	2	1	1	1	3	1	1	1	3	1	1	1	2	1	2	2	3	1	3	2	50	35	15	7	4	7	4	6	3	4	5	4	6
2	2	1	8	3	2	2	56	2	2	2	2	3	2	2	2	3	2	2	2	3	2	2	2	3	2	3	2	40	24	16	4	4	4	4	4	4	4	4	4	4
2	2	1	12	3	3	2	41	2	1	1	1	4	1	2	1	2	1	1	1	4	1	1	1	4	1	2	1	44	30	14	5	3	5	4	5	3	5	5	4	5
2	2	1	12	3	3	2	56	2	2	2	2	3	2	2	2	3	2	2	2	3	2	2	2	3	2	3	2	36	25	11	3	1	1	1	7	4	4	5	5	5
2	2	1	12	3	3	2	51	2	3	1	1	3	2	3	2	3	2	2	2	2	2	2	1	3	1	3	1	40	27	13	4	3	4	3	5	4	5	5	3	4
2	2	1	12	3	3	2	55	3	3	3	1	2	1	3	3	2	3	3	1	4	1	1	1	3	2	3	1	50	30	20	5	5	5	5	5	5	5	5	5	5
2	2	1	36	4	4	3	45	1	2	2	2	3	1	1	1	3	1	1	1	2	2	1	2	4	1	3	2	38	25	13	4	3	2	3	5	3	5	5	4	4
2	2	1	24	5	3	2	40	1	1	2	2	3	1	2	2	2	1	1	1	1	1	2	1	4	1	1	2	43	33	10	6	1	6	1	6	2	3	6	6	6
2	2	1	6	3	3	1	31	1	1	1	1	4	1	1	1	1	1	1	1	1	1	1	2	1	1	2	1	42	24	18	4	5	4	4	4	5	4	4	4	4
2	2	1	6	4	2	1	45	1	1	2	1	4	1	2	3	3	1	1	1	3	1	1	2	3	1	3	1	45	26	19	5	6	4	5	4	6	5	4	2	4
2	2	1	12	5	3	1	44	1	1	1	1	4	1	1	1	4	1	1	1	4	1	1	1	4	1	4	1	40	23	17	4	5	3	4	4	4	4	4	4	4
2	2	1	6	3	3	1	43	1	2	2	1	4	1	1	2	2	1	1	1	1	1	1	2	3	2	3	2	43	29	14	5	3	4	5	5	3	5	5	3	5
2	2	1	9	4	3	1	38	2	1	1	1	1	1	2	1	1	1	1	1	2	1	2	1	3	2	4	1	56	42	14	7	5	7	3	7	3	7	7	3	7
2	2	1	12	3	3	2	53	3	2	2	1	3	1	2	2	3	3	2	2	2	2	2	2	3	2	2	1	46	28	18	5	3	5	5	5	5	4	4	5	5
2	2	1	3	2	3	1	50	2	1	1	1	3	2	1	1	3	2	2	2	3	2	2	2	3	2	3	2	40	24	16	4	4	4	4	4	4	4	4	4	4
2	2	1	2	2	2	1	50	2	2	2	2	3	2	2	2	3	2	2	1	2	2	2	2	3	2	1	1	47	30	17	5	4	5	5	5	4	5	5	4	5
2	2	1	48	5	3	4	50	2	1	2	1	3	1	2	2	4	2	2	1	3	1	1	2	4	1	3	2	41	24	17	4	4	4	5	4	4	4	4	4	4
2	2	1	12	3	3	2	44	2	2	1	1	2	1	2	1	1	2	2	2	1	2	2	3	3	2	1	2	55	32	23	5	6	6	6	6	6	6	3	5	6
2	2	1	4	3	2	1	56	2	2	2	2	3	2	2	2	3	2	2	2	3	2	2	2	4	1	4	1	43	26	17	5	5	5	4	4	4	4	4	4	4
2	2	1	18	4	3	2	39	2	1	1	1	3	1	1	1	2	1	1	1	2	1	1	2	3	2	2	2	46	37	9	6	3	7	2	7	2	6	5	2	6
2	2	1	3	2	3	1	43	1	1	2	1	4	1	2	1	4	1	1	1	3	1	2	1	3	1	2	1	40	24	16	4	4	4	4	4	4	4	4	4	4
2	2	1	8	3	2	2	56	2	2	2	2	3	2	2	2	3	2	2	2	3	2	2	2	3	2	3	2	40	36	4	7	1	7	1	7	1	7	7	1	1
2	2	1	24	5	3	2	25	1	1	1	1	1	1	1	1	1	1	1	1	1	1	1	1	1	1	1	1	50	39	11	7	2	6	1	7	4	6	6	4	7
2	2	1	5	2	5	1	55	2	2	2	2	3	2	2	2	3	2	2	2	3	2	2	2	3	2	3	1	40	24	16	4	4	4	4	4	4	4	4	4	4
2	2	1	24	5	3	2	35	1	1	1	1	2	1	1	1	2	1	1	1	2	1	1	2	3	1	2	2	45	33	12	6	3	6	4	3	3	6	6	2	6
2	2	1	18	4	3	2	40	1	1	3	2	3	1	1	1	2	1	2	1	1	2	2	1	3	1	1	2	57	36	21	6	7	6	2	6	6	6	6	6	6
2	2	1	36	5	3	3	40	1	1	1	1	2	2	3	3	3	1	1	1	1	1	1	1	2	1	3	2	42	30	12	3	2	3	2	6	4	6	6	4	6
2	2	1	2	2	2	1	29	1	1	1	1	1	1	2	1	1	1	1	1	1	1	1	1	1	1	1	3	52	38	14	7	1	7	4	6	4	6	7	5	5
2	2	1	18	4	3	2	55	3	2	2	2	3	2	3	3	2	3	2	1	2	2	2	2	2	2	2	2	60	36	24	6	6	6	6	6	6	6	6	6	6
2	2	1	24	5	3	2	49	4	1	4	2	3	1	1	2	3	2	1	2	1	1	2	1	3	1	3	1	41	33	8	6	4	6	2	3	1	6	6	1	6
2	2	1	6	2	3	2	38	2	1	2	1	2	1	1	3	2	1	1	1	2	1	3	1	1	1	2	1	49	31	18	5	5	5	3	6	6	5	5	4	5
2	2	1	10	3	5	1	44	2	3	3	1	3	1	1	1	2	1	1	2	4	1	1	1	3	1	2	1	42	34	8	6	4	6	1	5	1	6	5	2	6
2	2	1	36	4	3	4	33	1	1	1	1	2	1	2	1	1	1	1	1	1	1	1	2	3	1	1	2	37	30	7	4	1	6	2	6	2	4	5	2	5
2	2	1	30	3	3	5	29	1	1	1	1	1	1	1	1	2	1	1	1	1	1	1	1	2	2	1	1	59	35	24	6	5	6	7	6	6	5	6	6	6
2	2	1	12	5	3	1	33	1	1	1	1	2	1	1	1	3	1	1	1	1	1	1	1	2	1	2	2	40	27	13	6	2	5	3	4	4	4	4	4	4
2	2	1	24	5	2	3	38	2	2	2	1	2	1	1	1	2	2	1	1	1	1	1	2	1	2	3	1	41	26	15	4	3	4	4	6	4	4	4	4	4
2	2	1	4	5	1	1	43	2	2	2	2	2	1	1	2	1	1	1	1	4	1	1	1	4	1	3	1	60	36	24	6	6	6	6	6	6	6	6	6	6
2	2	1	32	5	2	4	36	1	1	1	1	4	1	1	1	3	1	1	1	1	1	1	1	3	1	3	1	53	35	18	6	6	6	3	5	5	6	6	4	6
2	2	1	45	4	3	5	45	2	2	2	1	4	1	1	2	4	2	1	1	1	1	1	2	2	1	3	2	41	33	8	4	3	6	2	6	2	6	5	1	6
2	2	1	24	3	3	4	46	1	1	2	1	4	1	1	3	4	1	1	1	4	1	1	1	4	1	3	1	55	36	19	7	4	7	4	7	7	7	4	4	4
2	2	1	12	4	2	2	56	2	2	2	2	3	2	2	2	3	2	2	2	3	2	2	2	3	2	3	2	70	42	28	7	7	7	7	7	7	7	7	7	7
2	2	1	9	4	3	1	45	2	1	3	1	3	1	1	1	3	2	2	1	1	1	1	2	3	1	4	2	46	31	15	5	4	3	2	6	6	6	6	3	5
2	2	1	6	4	2	1	43	2	2	2	1	3	1	1	1	3	1	1	1	3	1	1	1	3	1	3	2	31	19	12	4	3	3	3	3	3	3	3	3	3
2	2	1	18	4	3	2	41	2	2	2	2	2	1	1	1	2	2	2	2	2	1	1	2	1	1	2	2	63	42	21	7	4	7	4	7	6	7	7	7	7
2	2	1	18	4	3	2	39	2	2	2	1	2	1	1	2	2	2	1	1	2	1	1	2	2	1	2	1	49	30	19	5	5	5	4	5	5	5	5	5	5
2	2	1	12	5	3	1	54	2	3	2	1	3	1	3	3	3	1	2	1	2	1	1	4	3	2	3	2	59	36	23	4	2	7	7	7	7	7	4	7	7
2	2	1	8	3	2	2	39	2	1	1	1	3	1	1	1	3	1	1	1	2	1	1	1	3	1	3	2	55	31	24	5	6	6	6	5	6	5	5	6	5
2	2	1	60	4	4	5	39	2	1	1	1	2	1	1	3	2	2	1	1	3	1	2	1	2	1	2	1	50	35	15	7	3	7	3	4	5	6	5	4	6
2	2	1	6	3	3	1	34	2	1	1	1	3	1	1	1	1	1	1	1	1	1	2	1	3	1	2	1	40	27	13	4	3	2	2	5	5	5	5	3	6
2	2	1	16	3	4	2	63	3	3	3	3	3	2	2	2	3	2	2	2	2	2	2	2	4	1	4	3	50	29	21	3	6	4	3	6	6	6	6	6	4
2	2	1	6	3	3	1	56	2	2	2	2	3	2	2	2	3	2	2	2	3	2	2	2	3	2	3	2	21	13	8	2	2	2	2	2	2	2	2	2	3
2	2	1	4	3	2	1	58	2	2	2	2	3	2	3	2	3	2	2	2	3	2	2	2	3	2	3	2	30	18	12	3	3	3	3	3	3	3	3	3	3
2	2	1	36	5	3	3	50	3	2	2	1	2	2	1	1	2	2	2	2	4	1	1	2	3	1	4	2	52	36	16	7	4	7	4	7	4	7	4	4	4
2	2	1	6	3	3	1	56	2	2	2	2	3	2	2	2	3	2	2	2	3	2	2	2	3	2	3	2	50	30	20	5	5	5	5	5	5	5	5	5	5
2	2	1	0	1	3	1	51	2	2	3	3	3	2	2	2	1	2	1	1	2	1	2	1	4	1	4	2	53	30	23	6	6	6	6	6	6	4	4	5	4
2	2	1	48	5	3	4	39	2	2	2	1	2	1	1	2	1	1	1	1	1	1	1	2	2	1	3	3	45	33	12	6	4	6	2	6	2	6	6	4	3
2	2	1	6	3	3	1	56	2	2	2	2	3	2	2	2	3	2	2	2	3	2	2	2	3	2	3	2	40	24	16	4	4	4	4	4	4	4	4	4	4
2	2	1	18	4	3	2	55	2	3	3	1	3	2	2	2	3	2	2	2	3	2	2	2	2	2	2	2	40	24	16	4	4	4	4	4	4	4	4	4	4
2	2	1	36	5	3	3	53	3	3	2	1	3	3	3	2	2	2	3	2	2	2	1	1	2	1	2	2	46	27	19	6	3	3	5	4	6	5	5	5	4
2	2	1	12	4	2	2	45	1	1	2	1	4	1	3	1	2	1	1	1	2	1	4	2	3	1	3	1	49	25	24	5	6	4	7	4	5	4	4	6	4
2	2	1	48	5	4	3	60	2	2	2	2	2	3	3	3	3	2	2	2	2	3	3	2	3	1	3	3	45	27	18	4	4	5	5	5	4	5	4	5	4
2	2	1	24	5	3	2	38	2	1	2	1	3	1	1	1	2	1	1	1	4	1	1	1	2	1	2	1	50	30	20	5	5	5	5	5	5	5	5	5	5
2	2	1	32	5	4	2	44	2	2	2	1	3	1	1	1	3	1	1	1	1	1	2	1	4	3	3	1	49	30	19	4	4	4	4	5	6	6	6	5	5
2	2	1	12	4	2	2	40	2	1	1	1	2	1	1	1	3	1	1	1	1	1	3	3	2	2	3	1	41	28	13	5	4	3	3	5	3	5	5	3	5
2	2	1	8	3	2	2	43	1	1	2	2	2	1	2	3	2	1	1	2	3	1	1	1	3	1	3	1	58	35	23	6	6	6	6	6	6	6	6	5	5
2	2	1	12	5	3	1	56	3	2	2	2	3	2	2	2	3	2	2	2	2	2	3	2	3	2	2	2	50	30	20	5	5	5	5	5	5	5	5	5	5
2	2	1	24	5	3	2	44	1	1	2	1	4	1	1	2	3	1	1	1	4	1	1	1	4	1	3	1	32	21	11	2	2	2	2	5	5	5	4	2	3
2	2	1	64	5	4	4	41	2	1	2	1	2	1	1	3	2	1	1	1	4	1	1	1	2	1	3	2	46	28	18	5	3	5	4	4	7	5	5	4	4
2	3	1	2	2	2	1	56	2	2	2	2	3	2	2	2	3	2	2	2	3	2	2	2	3	2	3	2	40	24	16	4	4	4	4	4	4	4	4	4	4
2	3	1	60	4	5	4	65	2	2	2	2	3	2	3	3	3	2	3	3	2	3	3	3	3	2	4	2	33	20	13	1	1	3	4	4	4	4	4	4	4
2	3	1	0	1	1	1	34	1	1	1	1	1	1	1	4	1	1	1	1	2	1	1	1	2	3	1	1	34	24	10	4	1	4	1	4	4	4	4	4	4
2	3	1	6	3	3	1	41	2	1	1	1	3	1	1	1	3	1	1	1	4	1	1	1	3	2	2	2	38	24	14	5	4	4	4	3	3	4	4	3	4
2	3	1	15	4	5	1	35	1	1	1	1	3	1	1	1	2	1	1	1	2	1	1	1	4	1	2	1	44	29	15	5	4	5	3	5	4	5	5	4	4
2	3	1	6	3	3	1	44	1	1	1	1	4	1	1	1	4	1	1	1	4	1	1	1	4	1	4	1	37	22	15	4	4	4	4	4	4	4	3	3	3
2	3	1	48	5	4	3	44	1	2	2	2	2	1	1	2	2	2	2	1	2	1	1	2	4	1	3	1	50	30	20	5	5	5	5	5	5	5	5	5	5
2	3	1	24	4	2	4	35	1	1	2	2	1	1	1	3	2	1	1	1	1	1	1	1	1	1	3	2	33	25	8	6	2	4	1	2	1	5	4	4	4
2	3	1	16	3	2	4	36	1	1	1	1	2	1	1	1	2	1	1	1	4	1	1	2	2	1	3	1	50	30	20	5	5	5	5	5	5	5	5	5	5
2	3	1	48	5	4	3	45	1	1	1	1	4	1	2	2	4	1	1	1	2	2	2	1	3	1	4	1	35	26	9	6	2	4	1	5	5	5	4	1	2
2	3	1	20	5	5	1	33	1	1	1	1	4	1	1	1	2	1	1	1	1	1	1	1	1	1	3	1	49	33	16	6	4	6	4	5	5	6	5	3	5
2	3	1	64	5	4	4	40	1	1	1	1	4	1	1	1	2	1	2	1	4	1	1	1	4	1	2	1	48	32	16	3	3	3	1	7	7	7	7	5	5
2	3	1	24	5	2	3	40	2	1	2	1	2	1	1	2	3	1	2	1	2	1	1	2	3	1	2	1	47	29	18	5	4	5	3	4	6	5	5	5	5
2	3	1	8	3	4	1	36	1	1	1	1	3	1	1	1	2	1	1	1	2	1	1	2	3	1	3	1	44	29	15	4	5	5	3	5	3	5	5	4	5
2	3	1	0	1	4	3	45	2	1	1	2	3	1	2	1	4	1	1	1	3	1	2	3	2	1	2	2	37	26	11	5	4	6	2	4	2	4	3	3	4
2	3	1	16	3	2	4	38	1	1	1	1	3	1	1	1	3	1	1	1	2	1	2	1	3	1	3	1	50	33	17	6	5	6	4	6	4	5	5	4	5
2	4	1	0	1	1	1	46	1	1	2	2	1	1	2	3	4	1	1	1	2	1	2	1	4	2	4	1	39	25	14	5	4	4	2	4	4	4	4	4	4
2	4	1	0	1	1	1	33	1	1	1	1	4	1	1	1	2	1	1	1	1	1	1	1	2	1	2	1	52	42	10	7	1	7	1	7	1	7	7	7	7
2	4	1	40	3	4	5	64	2	3	4	2	3	2	4	3	3	3	2	2	2	2	4	2	2	2	3	1	46	26	20	3	5	6	7	5	4	4	4	4	4
2	4	1	0	1	1	1	46	3	3	3	1	3	1	1	3	2	1	1	1	4	1	1	1	2	1	3	1	58	36	22	6	6	6	6	6	4	6	6	6	6
2	4	1	9	4	3	1	40	3	2	3	1	2	1	2	1	3	1	1	1	2	1	1	1	3	1	1	1	44	28	16	5	4	4	3	4	4	5	5	5	5
2	4	1	5	2	5	1	41	1	1	2	2	2	1	1	3	3	1	1	1	3	1	1	2	4	1	1	1	49	32	17	6	4	6	3	4	7	5	6	3	5
2	1	2	6	2	3	2	54	4	2	3	1	3	2	1	3	3	1	1	1	2	1	3	2	4	2	3	1	37	25	12	4	3	5	5	2	2	5	5	2	4
2	1	2	9	4	3	1	46	3	1	2	1	3	2	1	2	2	2	1	1	3	1	2	1	4	1	3	1	28	18	10	2	3	5	2	2	4	3	3	1	3
2	1	2	9	4	3	1	55	2	2	2	1	3	2	2	2	3	2	2	2	3	2	2	2	3	2	3	2	40	24	16	4	4	4	4	4	4	4	4	4	4
2	1	2	8	3	2	2	35	2	1	1	1	3	1	1	1	2	1	1	1	2	1	1	1	3	1	2	1	41	27	14	6	3	4	3	6	5	4	3	3	4
2	1	2	6	2	3	2	55	3	2	3	1	3	1	3	3	4	1	2	1	1	1	2	2	4	1	4	2	41	28	13	4	3	6	2	4	4	6	4	4	4
2	2	2	8	3	2	2	35	2	1	2	1	2	1	1	1	2	1	1	1	2	1	1	1	2	2	2	1	37	24	13	4	4	3	3	4	3	5	5	3	3
2	2	2	2	3	1	1	45	1	1	1	1	4	1	2	2	3	2	2	2	3	1	1	1	4	1	2	1	55	39	16	7	4	4	4	7	4	7	7	4	7
2	2	2	18	4	3	2	40	1	1	2	1	3	1	1	1	2	1	1	1	2	1	2	1	4	2	3	1	48	31	17	6	4	6	4	6	5	4	4	4	5
2	2	2	18	4	3	2	49	2	1	2	1	2	2	2	3	3	1	1	1	2	1	2	2	4	2	3	2	41	28	13	4	4	4	3	5	3	5	5	3	5
2	2	2	0	1	2	1	56	2	2	2	2	3	2	2	2	3	2	2	2	3	2	2	2	3	2	3	2	40	24	16	4	4	4	4	4	4	4	4	4	4
2	2	2	4	2	4	1	40	1	1	1	1	3	1	3	3	2	1	1	2	2	1	1	1	2	2	2	1	33	27	6	1	2	6	1	6	2	6	6	1	2
2	2	2	6	3	3	1	38	2	1	1	1	3	1	1	1	3	1	1	1	2	1	1	2	3	1	2	1	37	24	13	4	3	4	2	4	4	4	4	4	4
2	2	2	6	3	3	1	45	2	2	2	1	2	1	1	2	3	1	2	1	2	1	1	2	4	1	3	2	49	35	14	6	4	7	3	4	3	6	6	4	6
2	2	2	48	5	3	4	35	1	1	1	1	2	1	1	1	2	1	1	1	2	1	1	1	2	2	3	2	59	38	21	7	6	7	3	6	6	6	6	6	6
2	2	2	12	3	3	2	40	2	1	1	1	1	1	1	2	2	2	1	2	1	1	1	2	3	2	4	1	38	24	14	4	2	4	4	4	4	4	4	4	4
2	2	2	12	5	3	1	70	3	3	3	2	3	2	3	3	3	3	3	3	3	2	2	3	4	2	3	3	40	24	16	4	4	4	4	4	4	4	4	4	4
2	2	2	6	2	3	2	38	2	1	1	1	2	1	2	1	2	1	1	1	2	1	1	2	2	2	3	1	37	29	8	5	3	4	1	5	2	5	5	2	5
2	2	2	6	3	3	1	29	1	1	1	1	2	1	1	2	2	1	1	1	1	1	1	1	1	1	1	1	69	42	27	7	6	7	7	7	7	7	7	7	7
2	2	2	48	5	4	3	53	1	1	2	1	4	1	3	2	4	2	3	1	2	1	1	4	2	1	4	2	38	25	13	4	3	5	4	3	3	5	5	3	3
2	2	2	12	5	3	1	38	2	2	2	1	2	1	1	1	2	1	1	1	2	1	1	2	3	1	2	1	50	30	20	5	5	5	5	5	5	5	5	5	5
2	2	2	2	2	2	1	56	2	2	2	2	3	2	3	2	3	1	1	2	4	2	2	2	4	1	3	2	46	27	19	5	4	5	5	4	5	5	4	5	4
2	2	2	12	4	4	1	58	3	1	1	1	2	1	2	2	2	2	3	3	3	3	2	3	3	3	3	3	50	32	18	5	5	5	4	5	5	6	6	4	5
2	2	2	27	4	3	3	39	2	2	2	1	2	1	2	2	2	1	1	1	2	1	1	1	2	2	2	1	49	30	19	6	5	5	5	5	5	5	5	4	4
2	2	2	16	3	2	4	31	1	1	1	1	2	1	1	1	2	1	1	1	2	1	1	1	2	1	2	1	51	37	14	7	3	6	6	6	3	6	6	2	6
2	2	2	8	5	2	1	61	2	2	3	3	4	2	3	3	4	2	2	1	4	1	3	1	2	1	4	2	25	16	9	4	1	1	5	1	2	2	5	1	3
2	2	2	4	2	2	2	36	1	1	1	1	2	1	1	1	2	1	1	1	2	1	1	1	2	3	2	3	45	36	9	6	2	6	2	6	2	6	6	3	6
2	2	2	48	5	4	3	59	3	2	3	3	2	3	3	3	2	3	2	2	2	2	1	1	4	1	4	1	46	28	18	4	4	4	4	5	5	5	5	5	5
2	2	2	24	4	4	2	51	3	3	3	1	3	1	2	3	3	2	2	1	1	1	1	3	3	2	2	1	48	29	19	4	5	5	4	5	5	5	5	5	5
2	2	2	6	4	2	1	48	2	2	3	1	3	1	2	3	3	2	2	1	2	1	2	2	2	1	1	2	47	30	17	5	5	3	5	5	3	6	6	4	5
2	2	2	36	5	3	3	38	1	1	2	1	4	1	1	2	3	1	1	1	2	1	1	1	2	1	2	1	32	25	7	4	2	4	3	4	1	4	4	1	5
2	2	2	8	3	4	1	41	2	1	2	1	2	2	2	2	3	1	2	1	1	1	1	1	3	1	3	1	35	21	14	4	3	4	4	3	4	4	3	3	3
2	2	2	9	4	3	1	33	2	1	1	1	2	1	1	1	3	1	1	1	1	1	1	2	2	1	1	1	44	26	18	5	5	3	5	6	4	5	4	4	3
2	2	2	0	1	2	1	34	1	1	1	1	2	1	2	1	3	3	2	1	1	1	1	1	1	1	1	1	56	34	22	7	6	6	7	4	5	6	6	4	5
2	2	2	2	2	2	1	55	2	2	2	2	2	2	3	3	2	2	2	2	2	2	2	3	2	3	3	1	55	42	13	7	7	7	2	7	2	7	7	2	7
2	2	2	0	1	1	1	33	1	1	1	1	2	1	1	1	2	1	1	1	2	1	1	1	3	1	2	1	50	30	20	5	5	5	5	5	5	5	5	5	5
2	2	2	6	2	3	2	34	1	1	1	1	2	1	1	1	2	1	1	1	2	1	1	1	4	1	2	1	37	24	13	4	6	4	1	4	2	4	4	4	4
2	2	2	4	2	4	1	48	2	2	2	1	3	1	1	2	3	1	1	1	4	1	2	2	3	2	3	1	46	30	16	5	4	5	4	5	4	5	5	4	5
2	2	2	48	4	4	4	36	1	1	1	1	2	1	1	1	3	1	1	1	2	1	1	2	4	1	2	1	41	26	15	5	3	5	4	4	4	4	4	4	4
2	2	2	18	4	3	2	46	3	2	3	1	3	2	1	2	3	1	1	1	2	1	2	1	3	1	3	1	62	38	24	7	6	6	6	7	6	6	6	6	6
2	2	2	12	5	3	1	41	1	2	1	1	3	1	1	2	3	1	1	1	2	1	2	1	4	2	2	1	40	24	16	4	4	4	4	4	4	4	4	4	4
2	2	2	18	4	3	2	28	1	1	1	1	1	1	1	1	1	1	1	1	1	1	1	1	1	3	1	1	50	30	20	5	5	5	5	5	5	5	5	5	5
2	2	2	12	5	3	1	45	3	2	3	1	2	1	1	1	2	1	1	1	4	1	2	2	3	2	2	1	50	28	22	6	6	4	6	6	6	4	4	4	4
2	2	2	2	2	2	1	34	1	1	1	1	3	1	1	1	2	2	1	1	2	1	1	1	2	1	2	1	47	32	15	3	4	6	4	7	3	6	4	4	6
2	2	2	64	5	4	4	50	2	2	3	3	3	2	2	2	2	2	1	1	1	2	2	3	3	1	1	2	51	32	19	4	3	6	6	5	7	7	5	3	5
2	2	2	6	3	3	1	53	3	2	3	3	4	1	2	3	3	1	2	1	2	1	2	1	4	1	2	1	28	18	10	7	1	1	1	2	7	3	3	1	2
2	2	2	48	5	3	4	39	1	1	1	1	3	1	1	2	2	1	1	1	4	1	1	1	4	1	2	1	50	30	20	5	5	5	5	5	5	5	5	5	5
2	2	2	8	3	4	1	48	2	2	2	1	2	1	1	2	3	1	1	2	3	1	3	2	4	1	3	1	62	40	22	7	4	7	7	7	5	7	6	6	6
2	2	2	8	3	4	1	44	2	1	1	1	2	1	2	2	3	1	2	2	1	1	1	2	4	1	4	1	48	30	18	5	5	5	5	5	4	5	4	4	6
2	2	2	0	1	1	1	65	3	3	3	3	2	3	3	3	3	3	2	3	2	2	2	2	3	2	3	2	46	27	19	5	6	5	4	4	4	4	4	5	5
2	2	2	4	2	4	1	31	2	1	1	1	1	1	1	1	2	1	1	1	1	1	1	1	4	1	1	1	53	39	14	6	4	6	3	7	3	7	7	4	6
2	2	2	4	3	2	1	36	2	1	1	1	2	1	1	2	2	1	1	2	1	1	1	1	2	2	3	1	42	34	8	5	2	5	2	6	2	6	6	2	6
2	2	2	18	4	2	3	36	1	1	1	1	4	1	1	1	2	1	1	1	2	1	1	1	4	1	2	1	48	32	16	5	4	5	3	6	6	6	6	3	4
2	2	2	12	4	4	1	34	2	1	1	1	2	1	1	1	2	1	1	1	2	1	1	1	2	1	3	1	50	30	20	5	5	5	5	5	5	5	5	5	5
2	2	2	3	2	3	1	39	2	1	1	1	2	1	1	1	2	3	1	2	1	2	2	1	2	1	3	1	56	37	19	7	4	6	6	6	5	6	6	4	6
2	2	2	24	4	4	2	48	3	2	2	1	3	1	2	2	3	2	2	1	2	1	1	1	3	2	3	1	44	31	13	5	4	6	3	5	3	5	5	3	5
2	2	2	36	4	3	4	40	2	2	2	1	3	1	1	1	3	1	1	1	2	1	1	1	2	2	2	2	50	37	13	7	3	6	6	6	2	6	6	2	6
2	2	2	12	3	2	3	41	2	1	1	1	1	1	2	2	3	2	2	2	2	1	2	3	1	2	1	1	62	39	23	7	7	7	6	6	5	7	7	5	5
2	2	2	16	3	4	2	34	1	1	1	1	2	1	1	1	2	1	1	1	2	1	1	1	3	2	2	1	54	36	18	6	6	6	2	6	4	6	6	6	6
2	2	2	4	2	4	1	40	1	1	1	1	1	2	2	2	1	1	1	1	4	1	1	1	4	1	3	2	38	26	12	5	3	4	3	5	3	4	4	3	4
2	2	2	12	2	4	3	45	2	2	2	1	3	1	1	3	2	2	2	1	2	1	1	1	2	2	3	2	40	33	7	7	1	4	1	4	1	7	5	4	6
2	2	2	36	5	3	3	44	2	2	2	1	4	1	1	1	2	1	2	1	3	1	1	1	4	1	3	1	53	32	21	4	5	4	4	6	6	6	6	6	6
2	2	2	6	3	3	1	31	1	1	1	1	1	1	1	1	1	1	1	1	1	1	1	2	2	2	3	1	48	32	16	4	4	4	4	6	4	6	6	4	6
2	2	2	36	4	3	4	58	2	2	3	2	3	1	2	2	3	2	2	1	3	2	2	2	4	2	4	2	26	16	10	2	2	2	2	3	3	3	3	3	3
2	2	2	4	3	2	1	39	1	1	1	1	4	1	1	1	4	1	1	1	1	2	1	1	3	2	2	1	43	25	18	4	5	4	5	4	4	5	4	4	4
2	2	2	3	2	3	1	40	1	2	2	1	2	1	1	1	2	1	1	1	2	1	1	2	4	2	2	2	52	32	20	5	5	5	5	5	5	6	6	5	5
2	2	2	4	2	2	2	56	3	2	2	1	3	2	2	2	3	2	2	2	3	2	2	2	3	2	3	2	60	36	24	6	6	6	6	6	7	6	6	5	6
2	2	2	12	4	4	1	44	1	1	2	1	4	1	3	3	2	1	2	1	2	1	1	3	2	1	2	1	43	32	11	6	4	6	3	5	2	5	5	2	5
2	2	2	12	5	3	1	35	1	1	1	1	1	1	1	1	1	1	1	1	2	1	3	2	2	1	3	2	36	28	8	4	2	4	2	5	2	5	5	2	5
2	2	2	6	4	2	1	53	3	1	2	1	3	2	1	4	3	1	1	2	3	1	2	2	3	2	3	2	40	24	16	4	4	4	4	4	4	4	4	4	4
2	2	2	48	5	3	4	41	2	1	2	1	2	1	1	1	2	1	1	1	4	1	1	1	4	1	4	1	49	34	15	6	4	5	3	6	3	5	6	5	6
2	2	2	48	5	4	3	61	3	3	3	3	3	2	2	2	3	2	2	2	3	2	2	2	3	2	3	2	49	29	20	4	5	5	5	5	5	5	5	5	5
2	2	2	24	5	3	2	63	3	3	4	2	3	1	2	4	3	2	2	1	3	1	3	2	3	2	4	2	32	16	16	3	6	3	3	2	6	4	2	1	2
2	2	2	12	3	3	2	63	3	2	2	2	3	2	3	3	3	3	3	1	4	1	1	4	3	1	4	2	42	28	14	5	5	5	3	5	3	5	5	3	3
2	2	2	18	4	3	2	56	2	2	3	2	3	1	2	2	3	2	3	2	3	1	2	3	3	2	3	1	44	28	16	4	4	4	5	5	4	5	5	3	5
2	2	2	6	4	2	1	41	2	2	2	1	3	1	1	1	3	1	1	1	3	1	1	1	3	1	3	1	50	30	20	5	5	5	5	5	5	5	5	5	5
2	2	2	12	2	4	3	40	1	1	1	1	2	1	1	1	3	2	1	2	2	1	1	1	4	1	3	2	43	28	15	4	5	2	5	5	3	5	6	2	6
2	2	2	18	3	3	3	35	1	1	1	1	2	1	1	1	2	1	1	1	1	1	1	1	4	2	3	1	48	32	16	3	5	6	5	5	3	6	6	3	6
2	2	2	9	4	3	1	36	1	1	1	1	2	1	1	2	2	1	1	1	1	1	1	2	3	1	4	1	46	28	18	3	5	5	3	5	5	5	5	5	5
2	2	2	16	5	2	2	51	1	1	2	2	4	1	1	2	3	2	1	1	4	1	2	3	3	1	4	2	47	29	18	5	5	5	4	4	5	5	5	4	5
2	2	2	12	3	2	3	38	1	1	1	1	2	1	1	1	4	1	1	1	2	1	1	2	3	2	2	1	47	37	10	6	3	7	1	7	3	5	6	3	6
2	2	2	27	4	3	3	48	3	1	3	1	4	1	2	2	3	1	2	1	2	1	1	1	3	2	3	1	45	28	17	6	6	4	2	4	6	5	5	3	4
2	2	2	4	2	2	2	44	1	1	1	1	4	1	1	1	4	1	1	1	4	1	1	1	4	1	4	1	50	30	20	5	5	5	5	5	5	5	5	5	5
2	3	2	10	3	5	1	56	2	2	2	2	3	2	2	2	3	2	2	2	3	2	2	2	3	2	3	2	60	36	24	6	6	6	6	6	6	6	6	6	6
2	3	2	0	1	1	1	34	1	1	1	1	3	1	1	1	3	1	1	1	1	1	1	2	2	2	1	1	50	30	20	5	5	5	5	5	5	5	5	5	5
2	3	2	3	2	3	1	54	4	2	2	1	4	2	1	3	2	2	3	2	2	1	1	1	2	2	2	4	48	30	18	5	5	5	5	5	5	5	5	3	5
2	3	2	9	4	3	1	53	2	2	2	2	3	1	1	2	3	2	2	1	2	1	2	2	4	2	3	3	43	35	8	6	4	7	1	7	1	5	5	2	5
2	3	2	8	3	4	1	53	3	3	3	2	2	1	1	3	3	1	1	1	4	1	2	2	3	1	3	2	45	28	17	4	5	4	5	5	3	5	5	4	5
2	3	2	6	3	3	1	56	2	2	2	2	3	2	2	2	3	2	2	2	3	2	2	2	3	2	3	2	60	37	23	7	5	6	6	6	6	6	6	6	6
2	3	2	3	4	1	1	56	2	2	2	2	3	2	2	2	3	2	2	2	3	2	2	2	3	2	3	2	43	28	15	4	3	5	5	4	4	5	5	3	5
2	3	2	15	4	5	1	45	2	1	2	2	3	1	2	3	3	1	1	1	1	1	2	1	4	1	3	1	41	23	18	2	4	4	5	4	4	4	4	5	5
2	4	2	64	5	4	4	36	1	1	1	1	1	1	1	1	3	1	1	1	4	1	1	3	1	1	2	2	49	31	18	5	5	5	5	6	4	5	6	4	4
2	4	2	36	4	4	3	56	2	1	2	1	4	1	2	2	4	2	3	2	3	1	3	3	3	2	3	1	53	34	19	6	3	6	6	6	5	6	5	5	5
2	4	2	3	2	3	1	38	2	1	2	1	2	1	1	2	2	2	2	1	1	1	1	1	2	1	2	2	45	36	9	4	2	6	1	7	3	7	7	3	5
2	4	2	6	2	3	2	45	1	1	2	1	2	1	2	2	2	2	1	1	3	1	2	2	4	2	2	2	53	35	18	7	6	6	3	5	5	6	6	4	5
2	4	2	6	2	3	2	33	1	1	1	1	3	1	1	1	2	1	1	1	1	1	1	1	3	1	1	2	41	25	16	4	3	4	5	5	4	4	4	4	4
2	4	2	0	1	1	1	64	3	2	3	3	3	3	3	3	2	2	2	2	2	3	2	3	2	2	3	3	40	24	16	4	4	4	4	4	4	4	4	4	4
2	2	1	24	5	3	2	48	2	2	2	1	4	1	1	2	3	2	2	1	1	1	1	2	3	2	3	2	46	36	10	6	4	6	2	6	2	6	6	2	6
2	3	1	6	3	3	1	69	3	3	3	3	2	3	3	3	2	3	3	3	2	3	3	3	2	3	2	3	50	30	20	5	5	5	5	5	5	5	5	5	5
2	2	2	24	5	3	2	39	1	1	1	1	2	1	1	1	3	1	1	1	4	1	1	1	4	2	2	1	44	30	14	6	5	5	3	4	3	6	4	3	5
2	2	2	10	2	5	2	45	2	1	1	1	4	1	1	2	4	1	1	1	4	1	1	1	4	1	3	1	42	26	16	5	4	5	4	4	4	4	4	4	4
2	3	2	0	1	4	1	41	1	1	1	1	3	1	2	2	2	2	2	1	2	1	1	1	2	2	3	2	47	33	14	6	3	5	3	5	4	6	6	4	5
2	1	1	18	4	3	2	33	1	1	1	1	2	1	1	1	2	1	1	1	1	1	1	2	3	1	2	1	48	30	18	6	4	5	3	5	7	5	5	4	4
2	1	1	3	2	3	1	81	4	4	4	4	1	4	4	4	1	4	4	4	1	4	4	4	1	4	1	4	70	42	28	7	7	7	7	7	7	7	7	7	7
2	1	1	4	3	2	1	53	3	3	3	3	1	3	3	2	2	1	1	1	1	1	1	3	1	2	4	3	44	26	18	6	6	4	4	4	4	4	4	4	4
2	1	1	3	2	3	1	50	2	1	1	1	1	1	4	4	4	1	4	1	1	1	4	1	2	3	1	2	41	35	6	6	3	4	1	4	1	7	7	1	7
2	1	1	6	3	3	1	25	1	1	1	1	1	1	1	1	1	1	1	1	1	1	1	1	1	1	1	1	68	42	26	7	5	7	7	7	7	7	7	7	7
2	1	1	4	3	2	1	41	1	1	1	1	2	1	1	1	3	2	1	1	2	1	1	2	4	2	4	1	38	31	7	5	2	5	2	6	1	5	5	2	5
2	1	1	20	5	5	1	31	1	1	1	1	1	1	1	1	3	1	1	1	1	1	1	1	3	2	1	1	52	35	17	6	4	6	4	6	5	6	6	4	5
2	1	1	80	5	4	5	25	1	1	1	1	1	1	1	1	1	1	1	1	1	1	1	1	1	1	1	1	58	42	16	7	4	7	4	7	4	7	7	4	7
2	1	1	48	5	3	4	56	2	2	2	2	3	2	2	2	3	2	2	2	3	2	2	2	3	2	3	2	44	29	15	5	5	4	4	5	3	5	5	3	5
2	1	1	64	5	4	4	40	2	1	1	1	3	1	1	2	4	1	1	1	1	1	2	3	2	2	1	1	41	26	15	4	5	4	6	5	1	5	5	3	3
2	1	1	12	4	4	1	34	2	1	1	1	2	1	1	1	2	1	1	1	2	1	1	1	2	1	3	1	56	36	20	6	6	6	2	6	6	6	6	6	6
2	1	1	24	3	4	3	50	3	2	2	3	4	2	2	2	3	2	1	1	1	1	1	2	2	2	2	2	32	19	13	5	2	2	5	2	4	4	4	2	2
2	1	1	3	2	3	1	36	1	1	1	1	2	1	1	1	1	1	1	1	1	1	2	2	4	2	3	1	60	41	19	7	6	7	4	7	5	7	7	4	6
2	1	1	9	4	3	1	56	2	2	2	2	3	2	2	2	3	2	2	2	3	2	2	2	3	2	3	2	70	42	28	7	7	7	7	7	7	7	7	7	7
2	1	1	6	3	3	1	28	1	1	1	1	2	1	1	1	2	1	1	1	1	1	1	1	1	1	1	1	34	20	14	2	5	2	1	5	5	3	3	3	5
2	1	1	12	4	2	2	38	1	1	1	1	1	1	2	1	2	4	2	3	1	1	1	1	2	2	1	1	47	35	12	7	1	7	4	6	2	4	7	5	4
2	1	1	18	4	3	2	30	2	1	1	1	2	1	2	1	1	1	1	1	1	1	1	2	1	1	1	1	57	41	16	7	4	7	4	7	4	7	6	4	7
2	1	1	18	3	3	3	33	1	1	1	1	3	1	1	2	1	1	1	1	1	1	2	2	1	1	1	2	50	38	12	7	2	6	1	6	6	7	6	3	6
2	1	1	8	3	2	2	39	1	1	2	1	2	1	2	1	2	2	1	1	1	1	1	4	1	1	3	2	53	31	22	5	7	3	3	5	6	6	7	6	5
2	1	1	24	5	3	2	43	2	1	3	1	3	1	1	1	4	1	1	1	2	1	1	2	3	1	3	1	41	25	16	4	5	3	3	5	5	5	4	3	4
2	1	1	6	2	3	2	53	3	3	3	3	3	1	1	2	2	2	2	2	1	1	2	2	2	3	2	2	55	33	22	6	6	6	4	3	6	6	6	6	6
2	1	1	16	3	4	2	50	2	2	3	1	3	1	1	2	3	1	2	2	1	1	3	3	3	1	3	2	48	32	16	6	2	6	4	5	5	5	5	5	5
2	1	1	24	5	3	2	36	2	1	2	1	2	1	1	2	3	1	1	1	2	1	2	1	1	2	1	1	36	30	6	6	1	3	1	4	3	6	6	1	5
2	1	1	80	5	5	4	43	1	1	1	1	4	1	1	1	4	1	1	1	4	1	1	1	4	1	3	1	58	36	22	6	4	6	6	6	6	6	6	6	6
2	1	1	100	5	5	5	56	2	2	2	2	3	2	2	2	3	2	2	2	3	2	2	2	3	2	3	2	70	42	28	7	7	7	7	7	7	7	7	7	7
2	1	1	80	5	5	4	41	1	2	1	1	3	1	1	2	3	2	2	1	2	1	1	2	3	1	2	1	50	33	17	6	4	4	5	6	4	6	6	4	5
2	1	1	8	3	2	2	31	3	1	2	1	1	1	1	1	1	1	1	1	1	1	1	2	2	1	1	1	70	42	28	7	7	7	7	7	7	7	7	7	7
2	1	1	24	4	2	4	36	1	1	1	1	2	1	1	1	1	2	1	1	3	1	1	1	3	1	3	2	48	24	24	3	7	4	6	3	7	5	5	4	4
2	1	1	12	3	2	3	40	2	1	1	1	3	1	1	2	2	1	1	1	3	1	1	1	4	1	3	1	46	34	12	6	3	6	3	5	2	6	5	4	6
2	1	1	80	5	5	4	44	1	1	1	1	4	1	1	1	4	1	1	1	4	1	1	1	4	1	4	1	52	33	19	7	7	7	1	7	4	1	4	7	7
2	1	1	48	4	4	4	30	1	1	1	1	1	1	2	1	1	1	1	1	1	1	1	1	2	1	2	2	52	36	16	6	5	6	4	6	3	6	6	4	6
2	1	1	64	5	4	4	48	1	1	1	1	2	3	2	2	2	2	2	2	1	2	2	2	4	2	3	1	40	28	12	6	3	4	2	5	3	5	4	4	4
2	1	1	12	2	4	3	41	1	1	1	1	2	1	1	1	3	1	1	1	2	3	2	1	4	1	4	1	41	25	16	5	4	4	4	4	4	4	4	4	4
2	1	1	100	5	5	5	40	1	1	1	1	2	1	3	3	2	2	2	2	2	1	1	1	2	1	2	1	48	30	18	5	5	5	3	5	5	5	5	5	5
2	1	1	80	5	4	5	61	2	2	3	2	2	3	3	3	3	2	3	2	3	1	3	2	3	2	3	2	60	41	19	7	4	7	2	7	7	7	7	6	6
2	1	1	36	4	3	4	44	2	1	2	1	4	1	1	1	3	1	2	2	2	1	1	1	3	2	3	1	44	20	24	3	7	3	6	5	5	3	3	6	3
2	1	1	9	4	3	1	49	3	1	2	1	3	1	2	2	3	2	2	1	1	1	3	2	2	2	3	2	43	27	16	6	4	4	5	4	3	4	5	4	4
2	2	1	8	3	4	1	33	1	1	1	1	2	1	1	1	2	1	1	1	4	1	1	1	2	1	1	1	60	36	24	6	6	6	6	6	6	6	6	6	6
2	2	1	18	4	3	2	31	1	1	1	1	2	1	1	1	2	1	1	1	2	1	1	1	2	1	2	1	48	36	12	6	3	6	3	6	3	6	6	3	6
2	2	1	12	5	3	1	33	1	1	1	1	1	1	1	1	1	1	1	1	4	1	1	1	1	1	4	1	70	42	28	7	7	7	7	7	7	7	7	7	7
2	2	1	36	4	4	3	28	1	1	1	1	1	1	1	1	2	1	1	1	1	1	1	1	2	1	1	1	52	42	10	7	1	7	1	7	7	7	7	1	7
2	2	1	48	4	4	4	38	1	1	1	1	4	1	1	1	2	1	1	1	2	1	1	2	4	1	2	1	51	34	17	4	5	5	1	7	7	7	7	4	4
2	2	1	1	2	1	1	36	2	1	2	1	2	1	1	2	3	1	1	1	1	1	1	1	3	1	2	1	45	31	14	6	4	6	3	4	4	5	5	3	5
2	2	1	36	4	4	3	41	2	2	2	1	1	4	2	2	1	2	1	1	1	1	1	2	3	2	1	1	46	35	11	6	4	7	1	6	2	7	2	4	7
2	2	1	8	2	4	2	28	1	1	1	1	1	1	1	2	1	1	1	1	2	1	1	1	1	1	1	1	44	31	13	7	4	5	5	6	2	6	4	2	3
2	2	1	3	2	3	1	43	1	1	1	1	2	1	1	2	2	1	1	2	3	1	3	3	4	1	1	2	48	30	18	5	6	5	2	5	5	5	5	5	5
2	2	1	24	5	3	2	65	3	3	2	2	3	3	3	2	2	2	3	2	3	3	3	2	2	3	3	3	44	26	18	3	4	5	5	4	5	5	4	4	5
2	2	1	4	3	2	1	40	2	1	1	1	2	2	1	1	2	2	1	1	1	1	1	1	4	2	3	2	60	36	24	6	6	6	6	6	6	6	6	6	6
2	2	1	4	3	2	1	49	2	2	2	1	2	1	2	2	2	1	2	2	3	1	3	2	3	1	4	1	40	24	16	4	4	4	4	4	4	4	4	4	4
2	2	1	80	5	5	4	69	3	3	3	3	2	3	3	3	2	3	3	3	2	3	3	3	2	3	2	3	60	36	24	6	6	6	6	6	6	6	6	6	6
2	2	1	12	3	3	2	29	1	1	1	1	2	1	1	1	1	1	1	1	1	1	1	1	3	1	1	1	33	27	6	6	1	5	2	6	1	2	4	2	4
2	2	1	4	3	2	1	54	1	2	3	1	3	1	4	3	1	1	2	2	2	1	4	1	4	1	4	2	37	16	21	4	6	2	1	2	7	2	2	7	4
2	2	1	12	2	4	3	66	2	2	3	2	4	2	4	3	3	1	3	2	4	2	3	2	3	3	3	2	29	17	12	3	3	2	2	2	3	3	3	4	4
2	2	1	3	2	3	1	43	2	1	1	1	4	1	3	2	1	1	1	1	4	1	1	2	3	1	2	1	48	31	17	5	4	5	5	6	4	5	5	4	5
2	2	1	12	3	3	2	44	1	2	2	1	2	1	1	2	3	2	1	1	2	1	1	2	3	4	2	1	50	32	18	5	4	5	4	5	5	6	5	5	6
2	2	1	9	4	3	1	56	2	2	2	2	3	2	2	2	3	2	2	2	3	2	2	2	3	2	3	2	70	42	28	7	7	7	7	7	7	7	7	7	7
2	2	1	0	1	3	1	54	3	2	2	3	1	3	3	2	2	3	3	2	2	2	2	2	3	1	1	1	70	42	28	7	7	7	7	7	7	7	7	7	7
2	2	1	20	5	5	1	36	2	1	4	3	1	1	1	1	3	1	1	1	1	1	1	1	1	1	2	1	30	22	8	1	2	2	1	1	3	6	6	2	6
2	2	1	12	3	3	2	46	2	2	2	2	3	1	1	3	3	2	1	1	2	1	2	2	2	2	2	1	42	28	14	6	4	5	3	3	3	5	5	4	4
2	2	1	12	4	4	1	39	1	1	1	1	2	1	2	1	2	1	2	2	1	1	1	1	4	1	4	1	51	35	16	6	4	6	4	5	4	6	6	4	6
2	2	1	3	2	3	1	36	2	1	1	1	4	1	1	1	3	1	1	1	1	1	1	1	3	1	2	1	44	29	15	5	4	4	3	5	4	5	5	4	5
2	2	1	18	4	3	2	34	2	1	1	1	2	1	1	1	2	1	1	1	2	1	1	2	2	1	2	1	51	30	21	5	5	5	6	5	5	5	5	5	5
2	2	1	9	4	3	1	39	2	1	1	1	2	1	1	1	3	1	1	1	4	1	1	1	4	1	2	1	51	31	20	6	6	5	4	5	5	5	5	5	5
2	2	1	9	4	3	1	36	1	1	1	1	4	1	1	1	1	1	1	1	1	1	1	1	4	2	2	2	43	34	9	5	2	5	3	6	2	6	6	2	6
2	2	1	36	5	3	3	31	1	1	1	1	1	1	1	1	1	2	1	1	2	1	1	1	1	3	1	2	50	30	20	5	5	5	5	5	5	5	5	5	5
2	2	1	18	4	3	2	46	2	2	2	1	3	1	1	2	3	2	2	1	2	1	2	1	4	1	3	1	35	24	11	5	4	2	1	5	3	5	4	3	3
2	2	1	5	2	5	1	43	2	1	1	1	4	1	1	1	3	1	1	1	4	1	1	2	4	1	2	1	50	29	21	5	6	5	6	4	4	5	5	5	5
2	2	1	18	4	3	2	40	2	1	1	1	2	1	1	2	4	1	1	1	3	1	1	1	3	2	2	1	61	37	24	7	6	6	7	6	6	6	6	5	6
2	2	1	12	3	3	2	38	2	1	1	1	3	1	1	1	2	2	1	1	1	1	1	1	3	3	2	1	64	42	22	7	6	7	6	7	4	7	7	6	7
2	2	1	64	5	4	4	39	1	1	1	1	3	1	1	1	3	1	1	1	4	1	1	1	4	1	2	1	42	28	14	5	3	3	4	5	3	6	5	4	4
2	2	1	0	1	2	1	40	4	2	1	1	2	1	2	4	2	1	1	1	1	1	1	1	3	1	1	1	49	41	8	7	2	6	2	7	3	7	7	1	7
2	2	1	12	3	3	2	58	2	2	2	2	3	2	2	2	3	2	2	2	3	2	2	2	3	2	4	2	37	25	12	4	2	3	2	6	4	4	4	4	4
2	2	1	4	2	4	1	51	2	2	2	2	3	2	2	2	4	2	1	1	2	1	1	2	3	2	3	2	40	24	16	4	4	4	4	4	4	4	4	4	4
2	2	1	12	3	3	2	49	2	2	2	2	3	2	2	2	3	2	2	2	1	2	1	2	2	1	2	2	54	36	18	6	4	6	2	6	6	6	6	6	6
2	2	1	24	4	4	2	46	2	2	3	1	1	1	1	3	4	1	1	1	2	1	1	3	4	1	3	1	37	25	12	2	2	4	3	5	3	4	5	4	5
2	2	1	12	3	3	2	45	1	1	1	3	4	1	1	1	4	1	1	1	4	1	1	1	3	1	4	1	65	39	26	7	7	7	7	7	6	6	6	6	6
2	2	1	9	4	3	1	35	2	1	3	1	2	1	1	1	2	2	1	1	1	1	1	2	2	1	1	1	35	26	9	6	1	4	1	2	4	5	5	3	4
2	2	1	64	5	4	4	40	1	1	2	1	2	1	2	2	3	1	1	1	4	1	1	1	3	1	2	1	48	31	17	5	5	5	5	6	3	5	5	4	5
2	2	1	3	2	3	1	43	1	1	1	1	4	1	1	1	4	1	1	1	4	1	1	1	3	1	4	1	40	24	16	4	5	4	3	4	4	4	4	4	4
2	2	1	16	5	4	1	56	2	2	2	2	3	2	2	2	3	2	2	2	3	2	2	2	3	2	3	2	30	18	12	3	3	3	3	3	3	3	3	3	3
2	2	1	8	3	2	2	40	1	1	1	1	2	1	1	1	2	2	2	1	1	1	3	2	2	3	2	2	45	33	12	7	3	5	3	6	3	5	5	3	5
2	2	1	48	5	4	3	35	1	1	1	1	2	1	1	1	2	1	1	1	4	1	1	1	2	2	2	1	42	27	15	4	5	6	3	5	3	3	5	4	4
2	2	1	24	5	3	2	43	1	1	1	1	4	1	1	2	2	1	1	1	4	1	1	2	3	2	3	1	42	27	15	5	4	5	5	3	3	4	5	3	5
2	2	1	0	1	1	1	30	1	1	1	1	1	1	1	1	1	1	2	4	1	1	1	1	1	1	1	1	10	6	4	1	1	1	1	1	1	1	1	1	1
2	2	1	2	2	2	1	81	4	4	4	4	1	4	4	4	1	4	4	4	1	4	4	4	1	4	1	4	70	42	28	7	7	7	7	7	7	7	7	7	7
2	2	1	6	3	3	1	41	2	1	2	1	2	1	2	2	3	1	1	2	1	1	3	1	3	1	1	2	58	41	17	7	6	7	5	7	3	7	6	3	7
2	2	1	48	5	4	3	34	1	1	1	1	2	1	1	2	3	2	1	1	1	1	1	2	1	1	2	1	57	38	19	7	5	7	6	7	4	7	6	4	4
2	2	1	12	3	3	2	30	1	1	1	1	2	1	1	1	2	1	1	1	1	1	1	1	2	2	1	1	44	36	8	6	2	6	2	6	2	6	6	2	6
2	2	1	24	3	3	4	56	2	2	2	2	3	2	2	2	3	2	2	2	3	2	2	2	3	2	3	2	44	29	15	5	3	5	4	5	4	5	5	4	4
2	2	1	12	4	4	1	40	1	1	1	1	4	1	1	1	4	1	1	1	4	1	1	1	4	1	1	1	40	24	16	4	4	4	4	4	4	4	4	4	4
2	2	1	6	3	3	1	56	2	2	2	2	3	2	2	2	3	2	2	2	3	2	2	2	3	2	3	2	48	30	18	6	4	4	4	5	5	5	5	5	5
2	2	1	18	4	3	2	69	3	3	3	2	3	2	3	4	3	3	3	3	3	2	3	2	3	3	2	2	44	31	13	5	4	4	2	5	3	5	6	4	6
2	2	1	0	1	3	1	60	2	2	3	3	3	2	3	3	3	2	2	3	2	2	3	2	2	2	2	2	40	21	19	1	5	5	4	3	5	5	3	5	4
2	2	1	9	4	3	1	39	1	1	1	1	2	1	1	2	3	1	1	1	3	1	1	1	2	1	3	3	49	32	17	5	5	6	5	6	3	5	5	4	5
2	2	1	12	4	4	1	55	2	2	2	2	3	2	2	2	2	2	2	2	3	2	2	2	3	2	3	2	49	31	18	5	5	6	4	5	5	5	5	4	5
2	2	1	48	5	4	3	35	1	1	1	1	1	1	2	1	2	1	1	1	4	1	1	1	4	1	1	1	60	36	24	6	6	6	6	6	6	6	6	6	6
2	2	1	45	4	5	3	49	2	1	1	1	3	1	2	3	3	3	2	2	2	1	1	2	3	1	3	2	37	26	11	4	5	4	1	6	1	4	4	4	4
2	2	1	9	4	3	1	30	2	1	1	1	1	1	1	1	2	1	1	1	1	1	1	1	3	1	1	1	44	30	14	7	4	7	3	3	3	4	4	4	5
2	2	1	6	3	3	1	41	1	1	1	1	4	1	1	1	3	1	1	1	4	1	1	1	4	1	3	1	42	30	12	5	3	5	3	5	3	5	5	3	5
2	2	1	18	4	3	2	38	2	1	1	1	2	1	1	1	2	1	1	1	2	1	2	2	2	3	2	1	54	36	18	6	4	6	6	6	4	6	6	4	6
2	2	1	36	4	4	3	38	1	1	1	1	2	1	1	1	2	1	1	1	4	1	1	1	4	1	3	1	39	26	13	5	1	1	4	5	4	5	5	4	5
2	2	1	12	4	4	1	43	1	1	1	1	4	1	1	1	3	1	1	1	4	1	2	1	4	1	2	2	47	29	18	4	5	5	3	5	5	5	5	5	5
2	2	1	0	1	1	1	56	2	2	2	2	3	2	2	2	3	2	2	2	3	2	2	2	3	2	3	2	40	24	16	4	4	4	4	4	4	4	4	4	4
2	2	1	2	2	2	1	38	2	2	2	2	3	1	1	1	2	1	1	1	4	1	1	1	1	1	1	1	47	31	16	5	4	5	4	5	3	5	6	5	5
2	2	1	64	5	4	4	46	2	1	1	2	4	1	1	2	4	1	1	1	2	1	1	3	3	1	3	2	43	33	10	6	2	6	3	5	3	6	5	2	5
2	2	1	36	4	4	3	38	1	1	1	1	2	1	1	1	2	2	1	1	4	1	1	1	2	3	2	1	41	25	16	4	4	4	4	5	4	4	4	4	4
2	2	1	4	3	2	1	56	2	2	2	2	3	2	2	2	3	2	2	2	3	2	2	2	3	2	3	2	60	36	24	6	6	6	6	6	6	6	6	6	6
2	2	1	8	5	2	1	41	1	1	2	1	3	1	3	2	3	2	2	1	1	1	1	1	2	1	3	1	50	32	18	6	5	6	3	5	5	5	5	5	5
2	2	1	8	5	2	1	56	3	3	3	3	3	2	1	3	3	2	2	2	2	2	1	2	2	1	3	2	57	34	23	5	6	6	3	5	7	6	6	7	6
2	2	1	9	2	3	3	45	1	1	2	1	2	1	2	2	3	2	1	1	4	1	1	2	1	1	4	3	59	42	17	7	5	7	5	7	3	7	7	4	7
2	2	1	24	3	3	4	41	2	1	1	1	3	1	3	2	3	1	1	1	2	1	2	1	2	1	2	2	33	21	12	4	3	1	3	4	3	4	5	3	3
2	2	1	0	1	3	1	50	1	1	1	2	3	2	1	3	3	2	2	1	2	3	3	2	3	1	3	1	43	28	15	4	3	4	4	5	4	5	5	4	5
2	2	1	36	4	3	4	56	3	3	3	2	4	1	3	3	3	1	1	1	4	1	2	1	3	1	3	2	37	23	14	4	5	5	3	3	3	3	3	3	5
2	2	1	4	3	2	1	35	1	1	1	1	4	1	1	1	3	1	1	1	2	1	1	1	2	1	2	1	48	34	14	6	5	6	3	6	3	5	6	3	5
2	2	1	9	4	3	1	35	1	1	1	1	4	1	1	1	1	1	1	1	1	1	1	2	2	1	3	2	46	32	14	4	3	5	2	5	6	6	6	3	6
2	2	1	27	4	3	3	28	1	1	1	1	1	1	1	1	1	1	1	1	1	1	1	1	1	2	2	1	41	33	8	5	2	5	1	6	2	6	6	3	5
2	2	1	24	5	3	2	38	1	1	2	1	1	1	2	2	2	2	1	1	2	2	1	2	3	1	1	1	55	37	18	7	4	5	3	7	5	6	6	6	6
2	2	1	3	2	3	1	38	1	1	1	1	3	1	1	2	2	1	1	1	2	1	1	2	3	2	2	1	47	30	17	5	5	5	4	5	4	5	5	4	5
2	2	1	3	2	3	1	36	2	1	1	1	2	1	1	1	1	1	2	1	4	1	1	1	2	1	2	2	47	32	15	7	3	7	3	6	4	6	3	5	3
2	2	1	4	2	4	1	39	1	1	1	1	3	1	1	1	3	2	1	1	1	1	3	3	1	1	3	1	35	21	14	3	3	3	5	3	3	4	4	3	4
2	2	1	1	2	1	1	44	1	1	1	1	4	1	1	1	4	1	1	1	4	1	1	1	4	1	4	1	20	12	8	2	2	2	2	2	2	2	2	2	2
2	2	1	0	1	5	1	40	1	1	1	1	1	1	1	3	3	1	1	1	4	1	1	3	1	1	4	1	40	24	16	4	4	4	4	4	4	4	4	4	4
2	2	1	6	4	2	1	34	1	1	1	1	2	1	1	1	2	1	1	1	1	1	1	3	3	1	2	1	47	35	12	6	4	6	2	5	2	6	6	4	6
2	2	1	9	4	3	1	56	3	3	3	2	2	2	2	2	2	2	2	2	2	2	2	3	3	3	2	1	50	30	20	5	5	5	5	5	5	5	5	5	5
2	2	1	6	3	3	1	46	3	1	3	2	2	1	2	2	3	2	2	1	1	2	2	1	3	1	1	2	48	38	10	7	3	7	2	6	2	6	6	3	6
2	2	1	12	4	4	1	41	2	1	2	1	4	1	1	2	4	1	1	1	1	1	3	1	2	1	2	1	38	23	15	5	4	2	2	3	6	4	5	3	4
2	2	1	20	5	5	1	43	1	1	1	1	2	1	2	2	3	2	2	1	2	2	2	3	1	1	2	2	41	33	8	6	2	3	2	6	2	6	6	2	6
2	2	1	8	3	2	2	44	3	2	3	3	3	1	1	1	3	2	1	1	1	1	1	1	3	1	2	1	39	23	16	4	5	5	4	3	4	3	4	3	4
2	2	1	12	5	3	1	65	3	3	3	3	4	2	3	3	2	3	3	3	2	2	2	1	4	2	3	1	50	30	20	5	5	5	5	5	5	5	5	5	5
2	2	1	18	4	3	2	50	2	1	2	2	4	1	1	3	3	2	1	1	2	1	2	2	3	2	3	2	42	26	16	4	5	5	3	4	5	5	5	3	3
2	2	1	64	5	4	4	45	2	1	2	1	4	1	2	2	4	1	2	1	1	1	2	1	3	2	2	1	42	27	15	5	4	5	5	5	2	4	4	4	4
2	2	1	12	5	3	1	40	1	1	1	1	1	1	1	1	3	4	3	2	1	1	1	1	3	1	3	1	52	36	16	7	4	5	4	6	5	7	6	3	5
2	2	1	12	3	3	2	38	2	2	2	2	2	1	1	2	2	1	1	1	1	1	1	1	4	1	1	1	47	33	14	6	3	7	4	5	3	5	5	4	5
2	2	1	4	2	2	2	44	3	3	1	1	2	1	1	2	2	2	1	1	2	1	2	2	3	1	3	1	49	30	19	5	4	5	5	5	5	5	5	5	5
2	2	1	12	5	3	1	56	2	2	2	2	3	2	2	2	3	2	2	2	3	2	2	2	3	2	3	2	70	42	28	7	7	7	7	7	7	7	7	7	7
2	2	1	12	5	3	1	69	2	2	3	3	4	2	2	3	4	2	2	3	3	2	3	3	3	3	4	2	38	29	9	4	2	4	3	5	2	6	6	2	4
2	2	1	18	4	3	2	53	2	1	1	1	2	1	2	1	2	3	3	3	2	3	2	2	2	3	3	3	43	26	17	4	4	4	5	4	4	5	5	4	4
2	2	1	18	4	3	2	39	2	1	2	1	2	1	1	1	2	1	1	1	4	1	1	2	4	1	1	1	48	39	9	7	1	7	1	7	2	6	6	5	6
2	2	1	12	3	3	2	56	2	2	2	2	3	2	2	2	3	2	2	2	3	2	2	2	3	2	3	2	46	27	19	4	5	5	5	4	5	5	5	4	4
2	2	1	64	5	4	4	33	2	2	1	1	1	1	1	2	1	1	1	1	1	1	1	1	3	1	2	1	62	42	20	7	5	7	6	7	4	7	7	5	7
2	2	1	18	4	3	2	36	1	1	1	1	4	1	1	1	2	1	1	1	2	1	1	3	2	1	2	1	40	36	4	7	1	7	1	7	1	7	4	1	4
2	2	1	24	5	2	3	33	1	1	1	1	4	1	1	1	1	1	1	1	1	1	1	4	1	1	1	1	46	42	4	7	1	7	1	7	1	7	7	1	7
2	2	1	10	3	5	1	35	1	1	1	1	2	1	1	1	1	1	1	1	1	1	2	1	4	2	3	1	50	32	18	4	4	5	4	6	4	6	5	6	6
2	2	1	32	5	4	2	41	1	1	1	1	4	1	1	1	3	1	1	1	4	1	1	1	4	1	3	1	52	30	22	7	7	7	7	4	4	4	4	4	4
2	2	1	6	3	3	1	41	1	2	2	1	3	1	1	1	3	1	1	1	2	1	1	2	2	2	3	2	47	32	15	6	5	6	4	5	3	4	5	3	6
2	2	1	6	3	3	1	49	2	2	2	2	3	1	2	2	3	2	2	1	3	1	1	1	4	1	3	1	56	36	20	6	6	6	6	6	4	6	6	4	6
2	2	1	3	2	3	1	51	3	2	3	1	2	2	2	2	3	1	2	1	3	1	2	2	2	1	4	2	45	29	16	5	4	4	5	5	4	5	5	3	5
2	2	1	60	5	5	3	35	1	1	1	1	4	1	1	1	2	1	1	1	1	1	1	1	4	2	1	1	64	42	22	7	7	7	1	7	7	7	7	7	7
2	2	1	24	5	3	2	43	1	1	3	1	2	1	3	2	2	1	3	1	4	1	2	2	1	1	1	1	47	37	10	7	4	6	1	3	2	7	7	3	7
2	2	1	48	5	3	4	30	1	1	1	1	1	1	2	1	2	2	1	1	1	1	1	2	1	1	1	1	59	33	26	5	7	5	5	5	7	6	5	7	7
2	2	1	12	5	3	1	28	1	1	1	1	2	1	1	1	2	1	1	1	1	1	1	1	1	1	1	1	39	34	5	6	1	6	2	6	1	6	5	1	5
2	2	1	15	4	5	1	39	1	1	1	1	3	1	1	1	3	2	1	1	1	2	2	2	2	2	2	1	39	28	11	5	4	6	2	4	2	5	5	3	3
2	2	1	12	3	3	2	40	1	1	1	1	2	1	1	1	2	1	1	1	4	1	2	1	4	2	3	1	50	30	20	5	5	5	5	5	5	5	5	5	5
2	2	1	8	3	4	1	54	3	2	2	1	2	2	2	2	2	2	2	2	3	2	4	2	2	2	2	2	50	42	8	7	3	7	1	7	1	7	7	3	7
2	2	1	6	4	2	1	49	3	1	3	3	3	1	1	1	4	1	1	1	3	1	1	1	4	1	4	1	40	23	17	4	4	2	5	4	5	5	4	3	4
2	2	1	8	3	2	2	39	2	2	2	1	2	1	1	2	2	2	1	1	2	1	1	1	2	2	2	1	52	35	17	7	4	5	5	5	4	6	6	4	6
2	2	1	36	4	3	4	41	2	1	2	1	4	1	1	1	3	1	1	1	4	1	1	1	3	1	2	1	35	26	9	2	3	6	2	6	2	4	4	2	4
2	2	1	12	5	3	1	36	2	1	1	1	2	1	1	1	2	2	1	1	2	1	1	2	2	1	3	1	44	30	14	5	5	5	3	5	3	5	5	3	5
2	2	1	4	3	2	1	41	1	1	1	1	2	1	1	3	2	2	2	1	4	1	1	1	4	1	2	1	40	26	14	6	3	4	3	4	4	4	4	4	4
2	2	1	36	4	4	3	41	1	1	2	1	2	1	2	2	2	2	2	1	4	1	1	1	2	2	2	1	51	32	19	5	5	6	6	6	3	5	5	5	5
2	2	1	60	5	3	5	49	2	2	3	2	3	2	2	2	2	2	2	1	2	1	2	1	2	1	3	2	55	36	19	6	6	6	3	6	4	6	6	6	6
2	2	1	36	5	3	3	56	3	2	3	1	3	1	2	2	3	2	2	2	3	1	3	1	3	3	3	2	37	24	13	4	3	4	2	4	4	4	4	4	4
2	2	1	24	5	3	2	40	1	1	1	1	4	1	2	1	2	1	1	1	2	1	1	2	4	2	2	1	43	27	16	5	4	5	4	5	4	4	4	4	4
2	2	1	4	3	2	1	45	1	1	1	1	2	2	2	2	2	2	2	2	2	2	2	2	2	2	2	2	36	24	12	6	1	4	2	5	5	2	2	4	5
2	2	1	12	4	2	2	39	1	1	2	1	3	1	1	2	2	1	1	1	2	1	1	1	3	1	3	2	51	36	15	6	4	6	3	6	3	6	6	5	6
2	2	1	16	5	2	2	41	1	1	1	1	4	1	1	1	4	1	1	1	4	1	1	2	2	1	3	1	47	29	18	5	4	5	5	5	5	5	4	4	5
2	2	1	4	3	2	1	56	2	2	2	2	3	2	2	2	3	2	2	2	3	2	2	2	3	2	3	2	40	24	16	4	4	4	4	4	4	4	4	4	4
2	2	1	16	5	4	1	56	3	1	1	3	4	1	3	3	3	2	3	3	2	1	1	1	3	2	2	3	34	25	9	5	2	2	1	5	5	5	6	1	2
2	2	1	6	3	3	1	44	1	1	1	1	4	1	1	1	4	1	1	1	4	1	1	1	4	1	4	1	40	24	16	4	4	4	4	4	4	4	4	4	4
2	2	1	6	3	3	1	35	2	1	1	1	2	1	1	1	2	1	1	1	2	1	2	1	2	1	3	1	54	36	18	6	5	6	5	6	4	6	6	4	6
2	2	1	36	4	4	3	45	2	1	1	1	2	3	3	3	2	3	2	1	2	1	1	1	3	1	2	1	42	27	15	5	4	5	3	5	4	4	4	4	4
2	2	1	4	2	4	1	40	2	1	2	2	2	2	1	1	2	2	2	1	2	1	1	1	2	2	1	2	33	25	8	5	3	2	1	3	2	5	5	2	5
2	2	1	12	4	4	1	44	1	1	1	1	4	1	1	1	2	2	1	1	4	1	1	3	4	1	3	1	39	25	14	6	2	3	5	4	5	5	5	2	2
2	2	1	24	5	3	2	38	1	1	1	1	3	1	1	1	2	1	1	1	4	1	1	1	3	1	3	1	60	36	24	6	6	6	6	6	6	6	6	6	6
2	2	1	18	4	3	2	36	2	1	2	1	3	1	1	2	2	1	1	1	2	1	1	1	2	1	2	1	49	34	15	6	4	6	4	6	3	5	5	4	6
2	2	1	9	4	3	1	29	1	1	1	1	2	1	1	1	1	1	1	1	1	1	1	1	1	2	2	1	70	42	28	7	7	7	7	7	7	7	7	7	7
2	2	1	9	4	3	1	33	1	1	1	1	2	1	1	1	2	1	1	1	2	1	1	2	2	1	2	1	60	36	24	6	6	6	6	6	6	6	6	6	6
2	2	1	18	3	3	3	35	2	1	1	1	3	1	1	1	3	1	1	1	2	1	1	2	1	1	2	1	42	26	16	4	4	4	4	5	4	5	4	4	4
2	2	1	9	2	3	3	56	2	2	2	2	3	2	2	2	3	2	2	2	3	2	2	2	3	2	3	2	41	25	16	5	4	4	4	4	4	4	4	4	4
2	2	1	24	5	3	2	30	1	1	1	1	2	1	1	1	1	1	1	1	1	1	1	1	3	2	1	1	51	34	17	6	5	4	2	6	5	6	6	5	6
2	2	1	18	4	3	2	56	2	2	2	2	3	2	2	2	3	2	2	2	3	2	2	1	4	2	3	2	38	22	16	3	4	3	4	4	4	4	4	4	4
2	2	1	6	3	3	1	39	2	2	2	1	3	1	2	1	3	1	1	1	1	1	1	1	3	1	1	2	30	18	12	3	3	3	3	3	3	3	3	3	3
2	2	1	18	4	3	2	59	2	1	3	3	3	1	3	3	3	3	2	2	3	1	1	3	3	2	4	1	26	18	8	4	1	2	1	3	5	3	5	1	1
2	2	1	24	5	3	2	73	4	2	4	4	4	2	1	4	4	3	2	2	4	1	2	3	4	2	3	3	52	27	25	6	7	2	6	3	7	6	4	5	6
2	2	1	3	2	3	1	39	1	1	1	1	1	1	1	1	3	1	1	1	4	1	2	1	4	1	3	1	44	32	12	6	3	6	3	5	3	5	5	3	5
2	2	1	12	3	3	2	53	2	1	1	1	3	1	2	2	3	2	2	1	3	2	2	2	3	2	4	3	39	24	15	4	4	5	3	3	4	4	4	4	4
2	2	1	5	2	5	1	46	3	1	3	2	3	1	1	1	3	1	1	1	4	1	1	1	4	1	3	1	38	24	14	4	2	4	4	4	4	4	4	4	4
2	2	1	0	1	2	1	38	1	1	1	1	4	1	1	1	2	2	1	1	2	1	1	1	4	1	2	1	50	30	20	5	5	5	5	5	5	5	5	5	5
2	2	1	15	4	5	1	34	1	1	1	1	3	1	1	1	1	1	1	1	1	1	1	1	2	1	4	2	60	41	19	7	6	7	1	7	6	7	7	6	6
2	2	1	9	4	3	1	44	1	1	1	1	4	1	1	1	4	1	1	1	4	1	1	1	4	1	4	1	50	30	20	5	5	5	5	5	5	5	5	5	5
2	2	1	16	5	2	2	41	1	1	1	1	4	1	1	1	3	1	1	1	4	1	1	1	4	1	2	2	38	25	13	4	2	2	3	6	3	3	5	5	5
2	2	1	8	3	2	2	58	2	2	3	3	2	2	2	2	3	2	2	2	3	1	1	2	4	2	4	2	40	24	16	4	5	4	4	4	4	4	5	3	3
2	2	1	4	3	2	1	43	2	1	2	1	2	1	1	2	3	2	1	1	4	1	1	2	2	2	2	1	58	40	18	7	7	7	1	7	7	7	7	3	5
2	2	1	12	4	4	1	40	1	1	1	1	2	1	1	2	2	2	1	1	2	2	2	2	3	2	2	1	51	37	14	6	4	7	4	6	3	6	6	3	6
2	2	1	2	3	1	1	43	1	1	2	3	4	1	1	1	3	1	1	1	3	1	1	1	3	1	3	1	50	30	20	5	5	5	5	5	5	5	5	5	5
2	2	1	24	3	3	4	58	2	2	3	2	3	3	2	1	3	2	2	2	3	1	2	2	3	2	4	2	38	22	16	3	3	4	4	4	4	4	3	5	4
2	2	1	16	3	4	2	33	1	2	1	2	1	1	1	1	2	1	1	1	1	1	1	1	2	1	3	1	47	32	15	6	4	4	3	6	4	6	6	4	4
2	2	1	12	3	3	2	43	3	1	2	1	2	1	1	2	3	2	2	1	1	1	2	1	2	1	3	2	61	41	20	7	5	7	3	7	6	7	7	6	6
2	2	1	8	5	2	1	56	2	2	2	2	3	2	2	2	3	2	2	2	3	2	2	2	3	2	3	2	60	36	24	6	6	6	6	6	6	6	6	6	6
2	2	1	36	5	3	3	43	2	1	1	2	4	1	2	2	3	1	1	1	2	1	1	1	2	1	4	1	44	30	14	5	4	6	5	4	2	5	5	3	5
2	2	1	48	4	4	4	56	2	2	2	2	3	2	2	2	3	2	2	2	3	2	2	2	3	2	3	2	31	20	11	5	2	3	3	3	3	3	3	3	3
2	2	1	3	2	3	1	56	2	2	2	2	3	2	2	2	3	2	2	2	3	2	2	2	3	2	3	2	42	28	14	6	2	6	4	4	4	4	4	4	4
2	2	1	80	5	5	4	41	3	1	2	1	4	1	1	2	4	1	1	1	4	1	1	1	1	1	1	1	32	23	9	5	4	4	3	4	1	3	3	1	4
2	2	1	24	5	3	2	43	1	1	1	1	4	1	1	1	2	1	1	1	4	1	2	1	4	1	4	1	40	24	16	4	4	4	4	4	4	4	4	4	4
2	2	1	24	3	3	4	40	3	1	2	1	2	1	2	1	3	2	2	1	2	1	2	1	2	1	1	1	50	36	14	7	3	7	4	4	3	6	6	4	6
2	2	1	36	5	3	3	43	2	2	2	2	2	2	2	2	2	1	1	1	1	1	1	2	4	1	2	1	59	35	24	7	5	7	7	7	7	5	5	5	4
2	2	1	12	4	2	2	44	1	1	1	1	3	2	1	2	2	1	2	1	2	1	1	3	4	2	3	1	50	33	17	7	6	6	1	6	6	6	4	4	4
2	2	1	6	2	3	2	69	3	3	3	3	2	3	3	3	2	3	3	3	2	3	3	3	2	3	2	3	54	32	22	6	6	6	6	5	5	5	5	5	5
2	2	1	4	3	2	1	48	2	2	2	1	4	1	2	2	3	2	2	2	1	1	1	2	2	3	2	1	50	30	20	5	5	5	5	5	5	5	5	5	5
2	2	1	2	2	2	1	69	3	3	3	3	2	3	3	3	2	3	3	3	2	3	3	3	2	3	2	3	49	31	18	5	5	5	5	4	4	6	6	4	5
2	2	1	20	5	5	1	48	3	1	1	1	2	1	2	1	3	1	1	1	2	1	2	2	4	3	4	2	50	30	20	6	6	5	4	5	6	6	4	4	4
2	2	1	48	5	3	4	48	2	1	4	2	1	1	1	4	3	1	2	1	3	1	1	1	3	1	4	1	58	34	24	4	6	6	6	6	6	6	6	6	6
2	2	1	8	2	2	4	54	2	3	3	3	2	2	2	2	3	1	1	1	4	2	1	1	4	1	4	1	37	22	15	2	3	3	3	3	5	5	5	4	4
2	2	1	60	5	5	3	33	2	1	1	1	1	1	1	1	1	1	1	1	1	1	1	1	2	1	3	3	50	30	20	5	5	5	5	5	5	5	5	5	5
2	2	1	9	4	3	1	35	1	1	1	1	1	1	1	1	2	1	1	1	1	1	2	2	2	2	3	2	47	35	12	7	3	7	3	6	3	6	6	3	3
2	2	1	10	3	5	1	41	1	1	1	1	3	2	2	2	3	2	2	2	1	1	1	1	1	1	4	1	67	42	25	7	4	7	7	7	7	7	7	7	7
2	2	1	36	4	3	4	55	2	1	2	1	2	1	2	4	4	2	2	2	2	2	2	1	3	3	4	2	44	31	13	5	3	3	3	5	3	6	6	4	6
2	2	1	6	3	3	1	66	3	3	3	3	2	2	3	3	3	2	3	2	3	2	3	1	3	2	4	3	50	30	20	5	5	5	5	5	5	5	5	5	5
2	2	1	15	4	5	1	48	2	1	2	1	3	1	3	2	4	1	1	1	2	1	1	1	4	1	4	2	46	34	12	5	3	6	6	5	1	6	6	2	6
2	2	1	0	1	2	1	69	3	3	3	3	2	3	3	3	2	3	3	3	2	3	3	3	2	3	2	3	50	30	20	5	5	5	5	5	5	5	5	5	5
2	3	1	8	3	4	1	43	1	1	1	1	4	1	3	2	2	2	1	1	2	1	1	2	2	3	2	1	44	28	16	5	5	3	3	5	3	5	5	5	5
2	3	1	16	5	2	2	55	2	2	2	1	4	2	2	2	4	2	2	2	2	2	2	2	3	2	3	1	64	38	26	5	5	5	7	7	7	7	7	7	7
2	3	1	4	3	2	1	56	2	2	2	2	3	2	2	2	3	2	2	2	3	2	2	2	3	2	3	2	43	26	17	5	4	5	5	4	4	4	4	4	4
2	3	1	9	4	3	1	45	2	1	2	1	2	1	4	3	2	2	1	1	2	1	1	3	2	1	2	2	53	34	19	6	5	5	3	5	6	6	6	5	6
2	3	1	20	5	5	1	36	1	2	1	1	1	1	1	1	1	1	1	1	4	1	1	1	2	1	4	2	46	42	4	7	1	7	1	7	1	7	7	1	7
2	3	1	15	4	5	1	46	2	2	2	1	3	1	1	2	2	2	1	1	4	1	1	1	4	3	2	1	46	37	9	7	2	7	2	5	3	6	6	2	6
2	3	1	5	2	5	1	43	2	2	2	1	2	1	1	1	3	1	1	1	1	1	2	2	4	1	3	2	38	24	14	4	3	4	4	3	3	4	4	4	5
2	3	1	6	2	3	2	59	2	2	2	2	3	2	2	3	3	2	2	2	3	2	2	2	3	2	4	2	40	24	16	4	4	4	4	4	4	4	4	4	4
2	3	1	3	2	3	1	49	1	2	2	1	4	1	3	3	3	1	2	1	1	1	3	1	3	2	3	1	54	33	21	6	6	6	5	5	5	6	5	5	5
2	3	1	0	1	2	1	53	2	2	2	1	2	2	2	2	3	2	2	2	3	2	2	1	3	2	3	2	40	24	16	4	4	4	4	4	4	4	4	4	4
2	3	1	9	4	3	1	69	3	3	3	3	2	3	3	3	2	3	3	3	2	3	3	3	2	3	2	3	50	30	20	5	5	5	5	5	5	5	5	5	5
2	3	1	8	3	2	2	44	2	1	2	1	3	1	1	2	2	1	1	1	4	1	1	1	4	1	3	2	56	34	22	6	6	5	6	5	7	6	6	3	6
2	3	1	0	-2	-2	2	40	1	1	2	2	3	1	1	1	2	1	1	1	4	1	1	2	2	1	3	1	55	33	22	5	7	4	2	6	6	6	6	7	6
2	3	1	64	5	4	4	53	2	2	2	2	3	1	2	2	3	2	2	1	3	1	2	2	3	2	3	2	50	30	20	5	5	5	5	5	5	5	5	5	5
2	3	1	48	4	4	4	56	2	2	2	2	3	2	2	2	3	2	2	2	3	2	2	2	3	2	3	2	36	23	13	6	4	3	2	3	4	3	4	3	4
2	3	1	24	4	4	2	56	2	2	2	2	3	2	2	2	3	2	2	2	3	2	2	2	3	2	3	2	32	22	10	2	2	2	2	5	3	4	5	3	4
2	3	1	10	3	5	1	41	2	1	2	1	2	2	2	2	2	1	1	1	2	1	2	2	2	2	2	1	48	29	19	5	4	5	5	4	5	5	5	5	5
2	3	1	0	1	1	1	69	3	3	3	3	2	3	3	3	2	3	3	3	2	3	3	3	3	2	3	2	30	18	12	3	3	3	3	3	3	3	3	3	3
2	3	1	80	5	5	4	69	3	3	3	2	2	3	3	3	3	3	3	3	2	3	3	3	2	3	2	3	40	24	16	4	4	4	4	4	4	4	4	4	4
2	3	1	0	3	-2	3	36	1	1	1	1	2	1	1	1	2	1	1	1	3	1	1	1	4	1	3	1	46	28	18	5	5	5	5	5	4	5	4	4	4
2	3	1	80	5	5	4	66	3	2	2	2	2	2	4	4	1	3	3	3	1	3	4	4	2	4	2	2	55	32	23	5	6	5	6	5	6	5	6	5	6
2	3	1	2	2	2	1	49	1	1	1	1	2	1	2	2	3	2	2	2	3	2	2	2	3	2	3	2	33	21	12	3	3	3	3	5	2	2	4	4	4
2	3	1	4	3	2	1	43	2	1	2	2	4	1	1	1	3	1	1	1	1	2	1	3	1	1	4	1	43	24	19	4	7	4	4	4	4	4	4	4	4
2	3	1	12	4	4	1	44	1	1	1	1	4	1	1	1	4	1	1	1	4	1	1	1	4	1	4	1	40	24	16	4	4	4	4	4	4	4	4	4	4
2	3	1	0	1	2	1	44	1	1	1	1	4	1	1	1	4	1	1	1	4	1	1	1	4	1	4	1	39	23	16	3	4	4	4	4	4	4	4	4	4
2	3	1	12	5	3	1	56	2	2	2	2	3	2	2	2	3	2	2	2	3	2	2	2	3	2	3	2	40	25	15	5	3	4	4	4	4	4	4	4	4
2	3	1	60	4	5	4	58	3	2	2	2	3	2	2	2	3	2	2	2	3	2	2	2	3	2	3	2	40	24	16	4	4	4	4	4	4	4	4	4	4
2	4	1	8	3	4	1	35	1	1	1	1	4	1	2	2	2	2	1	1	1	1	1	1	2	1	1	1	44	32	12	6	3	6	2	5	3	5	5	4	5
2	4	1	24	5	2	3	56	2	2	2	2	3	2	2	2	3	2	2	2	3	2	2	2	3	2	3	2	44	31	13	5	4	5	4	6	2	5	5	3	5
2	4	1	24	4	4	2	56	2	2	2	2	3	2	2	2	3	2	2	2	3	2	2	2	3	2	3	2	70	42	28	7	7	7	7	7	7	7	7	7	7
2	4	1	18	4	3	2	38	1	1	1	1	2	1	2	1	2	2	2	1	1	1	2	2	2	2	2	1	49	34	15	6	5	6	4	6	2	6	6	4	4
2	4	1	48	4	4	4	38	1	1	1	1	4	1	1	1	4	1	1	1	2	1	1	1	2	2	2	1	39	28	11	6	6	6	2	3	1	5	4	2	4
2	4	1	1	2	1	1	51	3	2	2	2	3	1	2	2	3	2	2	2	1	1	2	2	2	2	3	2	32	20	12	4	2	4	4	3	3	3	3	3	3
2	4	1	36	4	4	3	38	2	1	1	2	2	1	2	1	2	2	1	1	2	1	1	1	3	1	2	1	56	34	22	6	6	6	4	6	6	6	6	6	4
2	4	1	12	4	4	1	46	2	2	3	1	2	1	1	3	3	1	2	1	2	1	3	1	2	2	2	2	46	29	17	6	5	6	4	3	4	6	4	4	4
2	4	1	32	5	4	2	31	1	1	1	1	4	1	1	1	2	1	1	1	1	1	1	2	1	1	1	1	56	41	15	7	4	7	3	7	4	7	7	4	6
2	4	1	8	3	4	1	46	2	1	2	1	2	1	2	2	2	2	2	2	1	1	3	3	2	2	2	2	48	33	15	6	4	4	3	5	4	6	6	4	6
2	4	1	3	2	3	1	51	2	2	2	1	4	1	2	2	4	1	2	1	4	1	1	2	4	1	3	1	37	25	12	4	2	5	2	6	6	4	3	2	3
2	4	1	2	2	2	1	55	4	1	1	2	3	2	3	3	3	2	2	1	4	1	1	1	4	1	3	2	39	25	14	6	3	7	4	3	3	3	3	4	3
2	4	1	24	4	4	2	44	1	1	1	1	4	1	1	1	4	1	1	1	4	1	1	1	4	1	4	1	10	6	4	1	1	1	1	1	1	1	1	1	1
2	4	1	12	3	3	2	40	2	1	1	1	3	1	1	1	2	3	1	1	2	1	1	1	3	2	3	1	50	30	20	5	5	5	5	5	5	5	5	5	5
2	4	1	3	2	3	1	44	3	1	2	1	3	1	2	1	3	1	1	1	4	1	1	1	4	1	2	1	44	28	16	5	3	5	5	5	3	3	5	5	5
2	1	2	4	2	2	2	40	2	2	1	1	2	1	1	2	2	2	1	1	4	1	1	1	3	1	2	1	24	18	6	1	1	1	1	6	1	3	3	3	4
2	1	2	36	5	3	3	39	2	1	1	1	2	1	1	1	2	2	1	1	2	1	1	2	3	2	2	2	49	42	7	7	1	7	1	7	4	7	7	1	7
2	1	2	3	2	3	1	33	2	1	1	1	2	1	1	1	2	1	1	1	2	1	1	1	2	1	2	1	59	32	27	3	7	1	7	7	7	7	7	6	7
2	1	2	12	4	4	1	51	2	2	2	1	4	1	1	3	3	2	3	1	1	1	2	1	4	2	3	2	55	35	20	6	6	6	3	6	6	6	5	5	6
2	1	2	30	3	5	3	35	1	1	1	1	1	1	1	1	2	1	1	1	2	1	1	1	4	1	4	1	56	33	23	6	6	6	5	6	6	6	5	6	4
2	1	2	6	3	3	1	31	1	1	1	1	2	1	1	1	2	1	1	1	1	1	2	1	1	1	3	1	46	31	15	7	6	4	3	6	3	4	5	3	5
2	1	2	8	3	4	1	41	2	1	1	1	2	1	1	2	2	1	1	1	1	1	3	1	4	3	3	1	53	38	15	7	4	7	4	6	3	6	6	4	6
2	1	2	12	4	4	1	36	1	1	1	1	2	1	1	1	2	1	1	1	4	1	1	1	3	2	2	1	40	30	10	5	5	5	2	5	2	5	5	1	5
2	1	2	6	4	2	1	38	4	2	2	1	2	1	1	1	2	1	1	1	1	1	1	1	3	2	1	1	44	31	13	6	5	2	2	7	2	6	4	4	6
2	1	2	0	1	5	1	49	2	2	2	2	4	1	1	2	3	1	2	1	2	2	1	1	4	2	3	1	46	32	14	7	4	5	2	5	5	5	5	3	5
2	1	2	15	4	5	1	33	1	1	1	1	2	1	1	2	2	2	1	1	1	1	1	1	2	1	2	1	43	34	9	6	2	4	1	6	2	6	6	4	6
2	1	2	12	3	3	2	40	3	1	2	1	3	2	1	1	2	1	1	1	1	1	1	2	2	1	3	2	52	36	16	6	4	7	3	7	5	5	5	4	6
2	2	2	12	3	2	3	55	2	2	2	3	4	2	2	2	3	2	2	1	2	1	2	2	3	2	3	2	39	24	15	2	4	5	4	4	3	5	5	4	3
2	2	2	45	4	5	3	35	2	1	1	1	2	1	1	1	2	1	1	1	2	1	1	1	4	1	2	1	53	35	18	6	6	6	1	7	6	6	5	5	5
2	2	2	16	5	4	1	54	2	2	2	2	4	2	2	1	3	2	2	1	3	2	1	2	4	1	3	2	46	27	19	5	5	4	4	5	5	5	4	5	4
2	2	2	2	2	2	1	59	3	3	2	2	2	2	2	2	2	2	2	2	3	3	3	3	4	2	1	2	41	25	16	4	4	4	4	5	4	4	4	4	4
2	2	2	3	2	3	1	30	1	1	1	1	2	1	1	1	2	1	1	1	1	1	1	1	3	1	1	1	53	42	11	7	3	7	2	7	3	7	7	3	7
2	2	2	9	4	3	1	43	2	1	2	1	2	1	1	4	2	1	2	1	1	1	1	1	3	1	4	2	56	39	17	6	5	6	1	7	5	7	7	6	6
2	2	2	6	4	2	1	43	2	2	1	1	3	1	1	2	3	1	1	1	3	1	1	1	3	2	3	1	40	31	9	6	3	4	2	6	2	5	5	2	5
2	2	2	24	3	4	3	33	1	1	1	1	3	1	1	1	2	1	1	1	2	1	1	1	2	1	2	1	46	38	8	7	3	6	1	7	2	6	6	2	6
2	2	2	45	4	5	3	25	1	1	1	1	1	1	1	1	1	1	1	1	1	1	1	1	1	1	1	1	51	39	12	7	4	6	2	7	2	7	7	4	5
2	2	2	6	3	3	1	46	2	2	2	3	2	2	1	3	1	1	1	1	2	1	1	3	2	2	4	1	39	30	9	6	2	6	1	6	2	4	4	4	4
2	2	2	16	5	4	1	41	3	1	1	1	2	1	1	2	2	1	1	1	1	1	1	2	4	2	3	2	54	30	24	5	6	5	6	5	6	5	5	6	5
2	2	2	12	5	3	1	46	2	1	2	2	3	1	1	2	3	1	1	1	3	1	2	2	4	1	3	1	48	30	18	5	4	5	5	5	4	5	5	5	5
2	2	2	48	5	3	4	44	1	1	2	2	4	1	1	1	4	1	1	1	2	1	2	1	3	2	2	2	40	24	16	4	4	4	4	4	4	4	4	4	4
2	2	2	9	4	3	1	45	2	1	1	1	4	2	1	1	4	1	1	1	4	1	1	1	4	1	3	1	39	24	15	4	3	4	4	4	4	4	4	4	4
2	2	2	12	4	4	1	39	2	1	1	1	4	1	1	1	3	1	1	1	2	1	1	2	1	1	3	2	54	36	18	6	5	6	2	6	6	6	6	5	6
2	2	2	2	2	2	1	49	3	1	1	1	3	1	2	2	2	2	1	1	2	1	1	2	4	2	4	3	41	28	13	7	4	3	1	3	5	5	5	3	5
2	2	2	9	4	3	1	33	1	1	1	1	3	1	1	1	2	1	1	1	2	1	1	1	2	1	2	1	59	36	23	6	6	6	5	6	6	6	6	6	6
2	2	2	36	4	4	3	48	1	1	2	2	3	2	2	1	4	1	1	1	4	1	1	1	4	1	4	1	40	24	16	4	4	4	4	4	4	4	4	4	4
2	2	2	8	3	2	2	55	2	2	2	1	3	2	2	2	3	2	2	2	3	2	2	2	3	2	3	2	41	25	16	4	4	4	4	4	4	4	4	4	5
2	2	2	4	2	2	2	39	2	1	2	1	3	1	1	1	2	1	1	1	1	1	2	2	2	2	2	2	46	29	17	3	5	6	2	5	5	5	5	5	5
2	2	2	12	2	3	4	56	2	2	2	2	3	2	2	2	3	2	2	2	3	2	2	2	3	2	3	2	24	15	9	5	3	2	2	2	2	2	2	2	2
2	2	2	4	2	2	2	76	4	3	3	4	2	3	3	3	2	3	3	3	2	4	3	4	2	4	2	4	53	32	21	7	5	5	5	5	5	5	4	6	6
2	2	2	15	4	5	1	33	2	1	1	1	2	1	1	1	2	1	1	1	1	1	2	1	2	2	1	1	59	39	20	7	5	7	6	7	5	7	7	4	4
2	2	2	2	2	2	1	56	2	2	2	2	3	2	2	2	3	2	2	2	3	2	2	2	3	2	3	2	43	31	12	5	5	5	3	6	2	6	5	2	4
2	2	2	24	5	3	2	55	2	3	2	2	2	2	3	2	2	2	2	2	2	3	2	2	1	3	3	2	49	31	18	4	5	6	4	7	5	5	4	4	5
2	2	2	24	5	3	2	48	2	2	2	2	2	2	1	1	3	2	2	2	4	1	1	1	2	1	4	1	52	33	19	7	7	7	4	7	4	4	4	4	4
2	2	2	20	5	5	1	38	2	1	2	1	2	1	1	2	2	2	1	1	1	1	1	1	3	2	2	1	53	37	16	6	5	6	3	7	5	6	6	3	6
2	2	2	24	5	3	2	38	2	1	2	1	2	1	1	1	2	1	1	1	2	1	1	2	3	1	2	2	60	36	24	6	6	6	6	6	6	6	6	6	6
2	2	2	27	4	3	3	41	2	2	2	1	3	1	2	2	2	1	1	1	2	1	1	2	1	2	2	2	51	37	14	7	2	7	4	4	7	6	7	1	6
2	2	2	5	2	5	1	46	2	1	1	1	3	2	2	2	2	2	2	1	2	2	1	2	4	2	2	1	50	32	18	5	6	5	5	6	3	6	6	4	4
2	2	2	40	5	5	2	41	1	1	1	1	2	1	1	1	2	2	1	1	4	1	1	4	3	2	2	1	41	24	17	4	5	4	4	4	4	4	4	4	4
2	2	2	2	2	2	1	38	1	1	1	1	2	1	3	2	2	2	1	1	2	1	1	2	2	1	2	1	50	36	14	6	3	6	3	6	3	6	6	5	6
2	2	2	12	5	3	1	34	1	1	1	1	1	1	1	1	2	1	1	1	2	1	1	1	4	1	3	1	55	41	14	7	6	7	4	6	1	7	7	3	7
2	2	2	2	2	2	1	56	2	2	2	2	3	2	2	2	3	2	2	2	3	2	2	2	3	2	3	2	40	24	16	4	4	4	4	4	4	4	4	4	4
2	2	2	12	5	3	1	48	2	1	2	1	3	3	2	2	3	2	2	1	2	1	1	1	3	2	3	1	38	21	17	4	6	4	3	3	5	3	4	3	3
2	2	2	8	3	2	2	54	3	1	2	1	3	2	1	2	3	3	2	1	4	1	1	1	4	2	4	2	41	28	13	6	4	3	2	6	5	5	5	2	3
2	2	2	12	4	4	1	43	2	2	2	1	2	1	2	2	2	4	1	1	1	1	1	2	2	1	3	1	58	35	23	5	6	6	5	7	5	5	6	7	6
2	2	2	36	4	4	3	33	1	1	1	1	2	1	1	1	2	1	1	1	2	1	1	1	3	1	2	1	42	30	12	5	3	5	3	5	3	5	5	3	5
2	2	2	27	4	3	3	64	2	2	2	2	2	3	3	3	2	3	3	3	2	3	3	3	2	3	2	3	25	17	8	7	2	2	2	2	2	2	2	2	2
2	2	2	4	2	4	1	46	3	1	3	1	3	1	1	1	3	1	1	1	4	2	1	1	4	1	3	1	39	30	9	5	3	5	2	3	2	6	6	2	5
2	2	2	10	2	5	2	44	2	3	2	1	2	2	1	3	2	2	1	1	1	1	1	2	3	2	2	1	56	32	24	6	7	7	6	6	7	5	4	4	4
2	2	2	9	2	3	3	44	1	1	1	1	4	1	1	1	4	1	1	1	4	1	1	1	4	1	4	1	40	24	16	4	4	4	4	4	4	4	4	4	4
2	2	2	4	3	2	1	56	2	2	2	2	3	2	2	2	3	2	2	2	3	2	2	2	3	2	3	2	48	33	15	7	4	7	3	7	4	4	4	4	4
2	2	2	18	4	3	2	35	1	1	1	1	2	1	1	1	2	1	1	1	4	1	1	1	3	1	2	1	31	20	11	1	1	5	2	5	4	1	4	4	4
2	2	2	12	4	4	1	48	2	2	2	2	3	1	2	2	3	1	2	1	3	1	1	1	2	2	3	2	51	31	20	6	6	6	6	6	4	4	4	4	5
2	2	2	6	3	3	1	36	2	1	1	1	3	1	1	2	3	1	1	1	2	1	1	1	2	2	1	1	48	35	13	6	3	6	2	6	4	6	6	4	5
2	2	2	36	4	4	3	53	4	3	3	3	3	1	1	3	3	2	2	2	4	1	1	1	1	2	1	1	67	41	26	6	7	7	7	7	5	7	7	7	7
2	2	2	3	2	3	1	61	3	3	3	3	3	2	2	2	4	3	1	1	3	1	1	2	4	2	3	3	37	19	18	2	2	1	6	2	6	6	4	4	4
2	2	2	8	5	2	1	56	2	2	2	2	3	2	2	2	3	2	2	2	3	2	2	2	3	2	3	2	50	30	20	5	5	5	5	5	5	5	5	5	5
2	2	2	0	1	3	1	54	2	2	2	2	3	2	2	2	3	2	2	2	3	2	2	2	3	2	1	2	40	24	16	4	4	4	4	4	4	4	4	4	4
2	2	2	16	5	2	2	44	1	1	1	1	4	1	1	1	4	1	1	1	4	1	1	1	4	1	4	1	40	24	16	4	4	4	4	4	4	4	4	4	4
2	2	2	6	3	3	1	39	1	1	1	1	2	2	1	1	2	2	1	1	2	1	1	1	4	1	4	1	46	26	20	3	5	3	5	5	5	5	5	5	5
2	2	2	9	4	3	1	44	1	1	2	1	3	4	1	1	2	1	1	1	2	2	2	3	3	1	2	1	48	29	19	3	7	7	7	7	1	4	4	4	4
2	2	2	16	5	4	1	33	1	1	1	1	1	1	1	3	2	1	2	2	2	1	1	1	1	1	1	1	48	36	12	6	2	6	2	6	4	6	6	4	6
2	2	2	64	5	4	4	46	2	2	3	1	4	2	1	1	3	2	1	1	1	2	1	2	4	2	1	1	47	34	13	6	3	7	2	5	2	7	5	6	4
2	2	2	15	4	5	1	55	1	2	2	4	3	1	1	2	2	2	2	2	2	2	2	3	4	1	4	2	55	31	24	5	6	5	6	5	6	5	5	6	6
2	2	2	12	3	3	2	46	3	2	3	1	2	1	1	2	2	2	1	1	1	2	2	2	4	1	2	2	55	34	21	5	3	5	6	6	6	6	6	6	6
2	2	2	4	3	2	1	51	1	1	3	2	4	1	2	3	4	1	2	1	3	2	2	1	2	2	3	1	45	28	17	6	5	5	4	3	5	5	5	3	4
2	2	2	16	5	2	2	34	1	1	1	1	2	1	1	1	2	1	1	1	4	1	1	2	2	1	1	1	56	42	14	7	5	7	5	7	1	7	7	3	7
2	2	2	45	4	5	3	30	1	1	1	1	2	1	1	1	2	1	1	1	1	1	1	1	2	1	2	1	47	33	14	6	4	5	3	5	3	6	5	4	6
2	2	2	9	4	3	1	41	3	1	1	1	2	1	2	3	3	1	1	1	1	1	1	2	2	1	3	2	59	36	23	6	6	6	6	6	5	6	6	6	6
2	2	2	12	5	3	1	48	2	2	2	1	3	1	2	2	2	1	3	2	1	1	2	2	3	1	3	2	45	25	20	5	4	3	5	4	6	5	4	5	4
2	2	2	9	4	3	1	54	3	2	4	4	4	1	2	2	3	2	2	1	2	1	1	2	3	1	2	1	46	30	16	5	5	5	3	5	4	5	5	4	5
2	2	2	36	5	3	3	45	3	2	1	2	3	1	1	1	3	1	1	1	3	1	1	2	4	1	3	1	44	30	14	5	3	4	3	7	4	5	5	4	4
2	2	2	36	4	4	3	64	3	2	4	3	4	1	2	3	4	2	1	3	1	1	2	4	3	2	3	3	37	24	13	5	4	7	2	4	5	3	3	2	2
2	2	2	20	5	5	1	43	1	1	1	1	2	1	1	2	3	1	1	1	4	1	2	1	4	1	4	1	49	29	20	4	5	5	5	5	5	5	5	5	5
2	2	2	48	5	3	4	36	2	1	1	1	2	1	1	2	2	2	1	2	2	1	1	1	2	1	2	1	42	31	11	5	3	5	2	6	2	5	5	4	5
2	2	2	6	4	2	1	46	2	1	2	2	3	1	2	2	2	2	2	1	3	1	1	1	4	1	3	1	50	30	20	5	5	5	5	5	5	5	5	5	5
2	2	2	24	4	4	2	63	3	3	3	3	2	1	2	4	3	1	2	1	4	3	3	3	4	1	2	2	70	42	28	7	7	7	7	7	7	7	7	7	7
2	2	2	9	4	3	1	39	1	1	1	1	3	1	1	1	3	1	1	1	3	1	1	1	3	1	4	1	46	30	16	5	4	5	4	5	4	5	5	4	5
2	2	2	0	1	3	1	31	1	1	1	1	2	1	1	1	2	1	1	1	2	1	1	1	2	1	2	1	36	28	8	2	1	2	2	6	2	6	6	3	6
2	2	2	12	3	3	2	41	3	1	2	1	1	1	2	2	3	1	1	1	3	1	1	2	2	1	3	1	59	32	27	6	7	4	7	5	7	6	5	6	6
2	2	2	6	3	3	1	53	1	1	1	1	4	1	2	2	3	1	2	2	4	1	1	4	1	4	4	2	59	36	23	7	4	4	7	7	6	6	6	6	6
2	2	2	8	5	2	1	43	1	1	1	1	3	1	1	1	4	1	1	1	4	1	1	1	4	1	4	1	35	24	11	3	1	4	3	5	4	4	5	3	3
2	2	2	12	4	2	2	53	3	1	2	1	3	1	3	3	4	1	1	1	3	1	1	2	4	1	4	2	42	29	13	5	5	5	6	4	1	5	5	1	5
2	2	2	3	2	3	1	34	2	1	1	1	3	1	1	1	2	2	1	1	1	1	1	1	1	2	2	1	41	29	12	4	3	5	3	6	3	4	5	3	5
2	2	2	8	3	2	2	38	2	1	4	1	3	1	1	1	2	1	1	1	1	1	1	1	3	1	2	1	42	25	17	5	5	4	4	4	4	4	4	4	4
2	2	2	36	5	3	3	45	2	1	2	2	2	1	2	2	3	1	1	1	4	1	1	1	4	1	3	1	50	33	17	6	4	6	5	4	4	6	5	4	6
2	2	2	12	2	4	3	41	1	2	2	1	2	1	1	2	3	2	1	1	2	1	1	1	3	2	3	1	56	36	20	6	4	6	6	6	5	6	6	5	6
2	2	2	12	2	4	3	46	1	1	2	2	2	1	1	2	2	2	2	1	2	2	1	2	4	2	3	2	51	30	21	5	5	5	6	5	5	5	5	5	5
2	2	2	18	4	3	2	53	1	2	2	2	3	1	2	1	3	2	2	2	3	2	2	2	3	2	3	2	30	19	11	1	1	4	1	4	4	5	1	5	4
2	2	2	9	4	3	1	56	2	2	2	2	3	2	2	2	3	2	2	2	3	2	2	2	3	2	3	2	48	30	18	5	3	5	5	5	5	5	5	5	5
2	2	2	9	4	3	1	40	2	1	2	1	3	1	2	2	2	1	1	1	1	1	2	1	2	2	2	2	44	32	12	6	3	6	3	5	3	5	5	3	5
2	2	2	12	3	3	2	36	1	1	1	1	4	1	1	1	2	1	1	1	1	1	1	2	3	1	3	1	53	36	17	6	5	6	2	6	6	6	6	4	6
2	2	2	6	3	3	1	36	2	2	1	1	2	2	1	2	2	2	1	1	1	1	1	1	2	2	1	1	45	28	17	5	6	4	3	5	4	5	5	4	4
2	2	2	6	2	3	2	35	1	1	1	1	2	1	1	1	3	1	1	1	2	1	1	1	2	2	3	1	52	28	24	6	6	6	7	4	7	4	4	4	4
2	2	2	36	4	3	4	54	3	2	2	1	4	1	2	2	3	2	1	1	3	1	2	2	3	2	4	2	43	28	15	5	3	5	4	4	4	5	5	4	4
2	2	2	24	4	4	2	48	3	2	1	1	2	1	1	1	2	1	2	2	3	3	2	2	3	2	2	2	40	24	16	4	4	4	4	4	4	4	4	4	4
2	2	2	15	2	3	5	44	2	2	2	2	4	1	1	1	2	1	1	1	1	1	2	2	4	3	1	1	36	30	6	6	2	6	1	7	1	7	2	2	2
2	2	2	2	2	2	1	56	2	2	2	3	3	1	2	2	3	1	2	1	3	2	2	3	3	2	4	2	49	30	19	5	4	5	5	5	5	5	5	5	5
2	2	2	9	4	3	1	56	3	3	3	3	4	1	2	2	3	2	1	1	4	2	1	2	4	1	2	1	48	32	16	6	5	5	3	6	4	5	5	4	5
2	2	2	16	5	2	2	49	3	2	2	1	3	1	2	2	3	2	1	1	2	1	1	2	3	2	3	2	49	31	18	5	5	5	3	5	6	5	5	4	6
2	2	2	15	2	5	3	46	1	1	1	1	4	1	1	1	1	1	2	2	3	2	2	2	4	1	3	3	48	29	19	7	5	5	5	5	5	4	4	4	4
2	2	2	24	5	3	2	43	1	2	1	1	3	1	1	1	3	1	1	1	4	1	2	1	3	1	4	1	47	30	17	5	3	5	5	5	4	5	5	5	5
2	2	2	16	5	4	1	39	2	1	1	1	3	1	1	1	2	1	1	1	4	1	1	1	3	1	3	1	50	35	15	6	5	5	5	6	3	6	6	2	6
2	2	2	16	5	4	1	43	2	1	2	1	1	1	2	2	2	2	1	1	1	2	1	3	3	2	2	2	42	29	13	5	3	4	2	6	4	5	4	4	5
2	2	2	12	4	2	2	38	2	1	1	1	2	1	1	1	2	1	1	1	2	1	2	1	3	2	3	1	58	36	22	6	6	6	6	6	6	6	6	4	6
2	2	2	12	4	2	2	29	2	1	1	1	2	1	1	1	1	1	1	1	1	1	1	1	2	1	1	1	39	24	15	4	3	4	3	6	6	3	4	3	3
2	2	2	2	2	2	1	48	2	2	2	1	3	1	1	2	3	2	1	1	3	1	1	1	4	2	3	2	46	29	17	4	4	5	5	5	4	5	5	4	5
2	2	2	6	4	2	1	54	2	2	3	3	3	2	2	2	3	2	2	2	4	1	1	1	4	1	2	1	42	26	16	6	4	4	4	4	4	4	4	4	4
2	2	2	16	5	4	1	61	2	2	3	2	2	3	3	3	2	2	2	2	3	3	3	3	3	1	4	1	51	31	20	6	5	5	5	5	5	5	5	5	5
2	2	2	3	2	3	1	41	2	1	1	1	4	1	1	2	3	1	1	1	2	1	1	1	3	2	2	2	44	28	16	4	5	5	4	5	4	5	4	3	5
2	2	2	0	1	1	1	56	2	2	2	2	3	2	2	2	3	2	2	2	3	2	2	2	3	2	3	2	20	12	8	2	2	2	2	2	2	2	2	2	2
2	2	2	9	4	3	1	48	2	1	2	2	3	2	2	2	3	2	1	1	2	1	1	3	2	1	3	2	50	36	14	6	3	6	3	6	3	6	6	5	6
2	2	2	6	2	3	2	40	1	1	3	2	2	1	1	2	2	2	1	1	1	1	2	2	1	1	3	2	35	21	14	6	3	4	3	2	6	2	4	2	3
2	2	2	45	4	5	3	44	1	1	1	1	4	1	1	1	4	1	1	1	4	1	1	1	4	1	4	1	60	36	24	6	6	6	6	6	6	6	6	6	6
2	2	2	24	5	2	3	53	2	1	2	1	3	1	2	2	3	2	2	2	3	2	2	2	3	2	3	2	50	30	20	5	5	5	5	5	5	5	5	5	5
2	2	2	36	4	3	4	36	1	2	1	1	1	2	1	1	1	2	1	1	4	1	1	1	2	2	2	1	47	36	11	6	1	6	2	6	3	6	6	5	6
2	2	2	0	1	2	1	63	2	2	3	3	3	3	3	2	3	2	3	2	3	2	2	2	3	2	3	2	34	22	12	4	3	3	3	4	3	4	3	3	4
2	2	2	8	5	2	1	35	1	1	2	1	2	1	1	1	3	2	2	1	1	1	1	1	1	1	3	1	31	17	14	3	3	3	3	3	4	3	3	4	2
2	2	2	9	4	3	1	41	2	1	2	1	3	1	1	2	3	1	1	1	2	1	1	2	3	2	2	1	44	29	15	5	4	3	5	6	2	6	4	4	5
2	2	2	6	3	3	1	53	3	3	2	1	4	2	1	2	3	3	1	1	2	1	1	1	4	3	2	2	41	27	14	4	3	3	3	5	5	6	4	3	5
2	2	2	8	3	2	2	39	1	1	1	1	3	1	2	1	2	2	1	1	2	1	1	1	3	1	3	2	37	27	10	5	3	4	2	5	3	4	5	2	4
2	2	2	0	-2	3	2	39	1	1	1	1	4	1	1	1	3	1	1	1	4	1	1	1	3	1	2	1	46	29	17	5	4	5	4	5	5	5	5	4	4
2	2	2	0	1	3	2	40	2	1	1	1	3	1	1	1	3	1	1	1	4	1	1	1	2	1	4	1	46	29	17	5	5	5	3	5	5	5	5	4	4
2	2	2	9	4	3	1	34	1	1	2	1	2	1	1	2	2	1	2	1	1	1	1	1	2	1	2	1	48	37	11	7	5	6	2	6	2	6	6	2	6
2	2	2	4	3	2	1	44	1	1	1	1	4	1	1	2	4	1	1	1	2	1	1	2	4	1	4	1	49	30	19	5	5	5	5	5	5	5	5	4	5
2	2	2	12	3	3	2	38	1	1	1	1	2	1	1	1	2	1	1	1	2	1	2	2	3	2	2	2	60	36	24	6	6	6	6	6	6	6	6	6	6
2	2	2	18	4	3	2	26	1	1	2	1	1	1	1	1	1	1	1	1	1	1	1	1	1	1	1	1	62	41	21	6	7	7	2	7	6	7	7	6	7
2	2	2	24	3	3	4	38	2	1	1	1	4	1	1	1	3	1	1	1	2	1	1	1	2	1	3	1	46	34	12	6	3	6	3	6	3	6	4	3	6
2	2	2	12	3	3	2	39	2	1	1	1	3	1	1	1	3	1	1	1	2	1	1	1	3	2	3	1	41	26	15	5	3	5	4	4	4	4	4	4	4
2	2	2	3	2	3	1	38	1	1	1	1	2	1	1	1	3	1	1	1	4	1	1	1	4	1	2	1	55	36	19	6	5	6	6	6	4	6	6	4	6
2	2	2	6	3	3	1	54	2	2	2	1	3	1	2	3	2	2	2	2	3	1	1	4	4	1	4	1	43	27	16	5	4	5	3	5	5	4	4	4	4
2	2	2	1	2	1	1	36	2	1	1	1	3	1	1	1	3	1	1	1	2	1	1	1	3	1	2	1	38	28	10	4	3	5	2	5	2	4	4	3	6
2	2	2	32	5	4	2	39	2	1	1	1	2	1	1	1	2	2	1	1	4	1	1	1	2	1	4	1	59	36	23	6	6	6	6	6	5	6	6	6	6
2	2	2	4	3	2	1	34	1	1	1	1	2	1	1	1	2	1	1	1	4	1	1	1	2	1	2	1	53	36	17	6	5	6	6	6	3	6	6	3	6
2	2	2	48	5	4	3	38	1	1	1	1	2	1	1	1	3	1	1	1	1	1	2	3	3	1	2	2	44	31	13	5	3	6	3	5	4	5	5	3	5
2	2	2	4	3	2	1	38	3	1	1	1	2	1	1	1	3	1	1	1	1	1	1	1	3	1	3	2	49	38	11	7	2	7	3	6	3	6	6	3	6
2	2	2	8	3	2	2	31	2	1	1	1	2	1	1	1	1	1	1	1	1	1	1	1	2	2	2	1	50	30	20	6	5	4	5	5	5	5	5	5	5
2	2	2	20	5	5	1	35	1	1	1	1	1	1	1	1	2	2	1	1	4	1	1	2	1	1	2	2	50	34	16	7	4	5	2	5	6	6	6	4	5
2	2	2	9	4	3	1	44	2	3	3	2	2	1	1	2	2	1	1	1	1	2	1	1	3	2	2	2	44	29	15	3	5	4	2	5	5	6	5	3	6
2	2	2	9	4	3	1	56	2	2	2	2	3	2	2	2	3	2	2	2	3	2	2	2	3	2	3	2	20	12	8	2	2	2	2	2	2	2	2	2	2
2	2	2	3	2	3	1	41	1	1	1	1	3	1	2	2	1	1	1	1	4	1	1	1	4	1	3	2	43	29	14	4	3	5	5	5	3	5	5	3	5
2	2	2	3	4	1	1	60	2	3	2	3	3	1	2	3	2	2	2	2	3	2	3	3	3	2	2	3	32	20	12	3	3	3	3	3	3	4	3	3	4
2	2	2	6	3	3	1	44	2	2	2	2	2	1	2	2	1	1	2	1	4	1	1	1	3	1	2	2	46	29	17	5	4	4	3	5	5	5	5	5	5
2	2	2	3	2	3	1	43	3	3	2	1	1	1	1	2	2	1	1	1	1	1	2	2	4	2	2	1	41	33	8	6	2	7	2	2	2	6	6	2	6
2	2	2	24	5	3	2	45	2	1	2	1	3	2	2	2	3	1	1	1	4	1	1	1	3	1	3	1	50	30	20	5	5	5	5	5	5	5	5	5	5
2	2	2	18	4	3	2	48	2	1	2	2	4	1	2	2	4	1	1	1	2	1	1	2	3	2	2	2	46	30	16	5	5	5	4	5	3	5	5	4	5
2	2	2	24	5	3	2	35	1	1	1	1	3	1	1	1	3	1	1	1	2	1	1	2	2	2	1	1	48	36	12	7	2	3	2	6	4	6	7	4	7
2	2	2	24	3	4	3	56	2	2	2	2	3	2	2	2	3	2	2	2	3	2	2	2	3	2	3	2	22	14	8	2	2	2	2	2	2	4	2	2	2
2	2	2	12	4	2	2	44	1	1	1	1	2	1	3	1	4	1	2	1	4	1	1	1	3	4	1	1	64	36	28	4	7	7	7	4	7	7	7	7	7
2	2	2	16	5	2	2	34	1	1	1	1	4	1	2	2	2	1	1	1	1	1	1	1	1	2	1	1	47	40	7	7	2	6	2	7	1	7	7	2	6
2	2	2	10	3	5	1	41	1	1	2	1	4	1	1	1	3	1	1	1	3	1	1	2	3	1	3	1	49	30	19	3	4	6	6	6	5	5	5	4	5
2	2	2	48	4	4	4	43	2	2	2	1	3	1	1	1	2	2	1	1	2	1	1	2	3	2	3	1	40	26	14	4	3	4	3	4	5	4	5	3	5
2	2	2	18	3	3	3	46	1	1	2	2	4	1	1	1	3	1	1	1	4	1	1	1	4	1	4	2	43	27	16	7	4	4	4	4	4	4	4	4	4
2	2	2	10	3	5	1	44	2	2	2	1	2	1	1	1	2	2	1	1	2	1	2	2	3	2	3	2	50	30	20	5	5	5	5	5	5	5	5	5	5
2	2	2	4	3	2	1	34	3	1	1	1	2	1	1	1	1	1	1	1	1	1	1	1	4	2	1	1	50	28	22	3	6	5	5	7	6	4	4	5	5
2	2	2	12	3	3	2	29	1	1	1	1	1	1	1	1	1	1	1	1	1	1	1	1	2	1	2	2	40	33	7	6	1	5	1	6	2	6	5	3	5
2	2	2	24	5	3	2	33	2	1	1	1	2	1	1	2	1	1	1	1	2	1	1	1	3	1	1	1	59	37	22	6	6	6	6	6	5	7	6	5	6
2	2	2	12	5	3	1	44	2	1	2	1	3	1	1	2	3	1	1	1	4	1	1	1	4	1	3	1	47	33	14	6	6	6	2	5	3	5	6	3	5
2	2	2	16	5	4	1	46	3	2	3	1	2	2	1	3	2	1	1	1	4	1	1	1	4	1	2	1	51	30	21	5	6	5	5	5	5	5	5	5	5
2	2	2	6	3	3	1	43	2	1	1	1	4	1	1	1	4	1	1	1	4	1	1	1	4	1	2	1	51	30	21	5	6	5	5	5	5	5	5	5	5
2	2	2	9	4	3	1	44	2	2	1	1	3	1	2	2	2	2	1	1	3	1	1	1	3	2	3	1	41	28	13	4	5	5	2	5	2	4	5	4	5
2	2	2	5	2	5	1	45	2	2	1	1	4	1	1	1	3	1	1	1	2	2	1	2	4	1	4	1	40	24	16	5	4	3	4	4	4	4	4	4	4
2	2	2	12	5	3	1	54	3	2	2	2	4	2	2	3	2	2	1	1	2	2	2	2	1	2	4	2	51	33	18	5	5	5	5	6	3	6	6	5	5
2	2	2	9	4	3	1	36	1	1	1	1	3	1	1	1	3	1	1	1	3	1	1	1	3	1	2	1	46	30	16	5	4	4	3	6	5	5	5	4	5
2	2	2	4	3	2	1	39	2	1	2	1	3	1	1	1	1	2	1	2	4	1	1	1	3	1	1	1	48	34	14	6	5	5	3	7	3	6	5	3	5
2	2	2	18	4	3	2	40	2	2	2	2	2	1	1	2	3	1	2	1	2	1	1	1	2	1	2	1	48	30	18	5	5	5	5	5	5	5	5	3	5
2	2	2	8	3	2	2	53	2	2	2	1	3	2	2	2	3	2	2	2	3	2	2	2	3	2	2	1	47	31	16	6	4	5	4	5	4	5	5	4	5
2	2	2	6	2	3	2	39	1	1	2	1	3	1	1	1	3	1	1	1	2	1	1	2	3	2	2	1	50	36	14	6	4	6	3	6	3	6	6	4	6
2	2	2	24	4	2	4	48	3	1	2	1	2	1	2	3	2	2	2	1	1	1	3	3	2	3	2	1	40	29	11	2	2	5	2	5	2	6	6	5	5
2	2	2	9	4	3	1	44	2	1	1	1	4	1	1	1	3	1	1	1	4	1	1	1	4	1	4	1	52	35	17	6	4	6	5	6	5	5	6	3	6
2	2	2	24	4	4	2	45	2	1	1	1	4	1	1	2	3	1	1	1	4	2	2	3	2	1	2	1	56	37	19	5	5	7	4	7	4	5	6	6	7
2	2	2	12	2	4	3	33	1	1	1	1	2	1	1	1	2	1	1	1	2	1	1	1	2	1	3	1	44	26	18	5	5	5	5	4	4	4	4	4	4
2	2	2	4	2	4	1	35	1	1	1	1	1	1	1	2	1	2	1	2	1	1	1	1	2	1	3	3	46	32	14	5	5	5	2	5	3	6	5	4	6
2	2	2	18	4	2	3	40	2	1	2	1	4	1	1	1	4	1	1	1	1	1	1	2	3	1	1	2	57	37	20	7	6	6	5	7	5	6	6	4	5
2	2	2	0	1	5	1	38	1	1	1	1	3	1	2	2	3	1	1	1	1	1	1	2	3	1	2	1	44	25	19	3	5	5	4	4	5	4	4	5	5
2	2	2	24	5	3	2	43	1	2	2	1	3	1	1	1	1	2	1	1	4	1	1	2	4	2	2	1	56	32	24	6	6	5	6	5	7	6	5	5	5
2	2	2	6	2	3	2	41	2	2	2	2	2	1	1	2	3	1	1	1	2	1	1	1	2	2	2	2	42	25	17	2	4	5	4	6	5	4	4	4	4
2	2	2	4	2	2	2	60	2	2	3	2	4	2	3	2	3	2	3	2	2	2	3	3	2	1	4	1	41	27	14	6	4	4	2	2	2	4	6	6	5
2	2	2	16	5	2	2	63	3	1	3	2	3	2	3	1	3	2	3	3	2	3	3	2	3	2	3	3	44	26	18	6	4	3	6	5	6	4	4	2	4
2	2	2	12	3	2	3	36	3	1	1	1	2	1	1	1	3	2	1	1	1	1	1	1	2	1	3	1	40	24	16	4	3	3	5	3	4	5	5	4	4
2	2	2	27	4	3	3	55	3	3	3	2	2	1	2	3	2	2	3	2	2	2	3	1	3	1	3	1	38	23	15	4	5	4	3	4	3	4	4	4	3
2	2	2	16	5	2	2	43	2	1	2	1	3	1	1	1	2	2	1	1	2	1	1	2	4	3	2	1	53	31	22	6	5	5	6	5	6	5	5	5	5
2	2	2	60	4	5	4	56	2	2	2	2	3	2	2	2	3	2	2	2	3	2	2	2	3	2	3	2	41	25	16	4	3	5	5	4	4	4	4	4	4
2	2	2	0	1	5	1	41	2	2	2	1	3	1	1	2	3	1	2	2	1	1	1	2	1	1	3	1	44	25	19	4	5	4	5	3	5	4	5	4	5
2	2	2	0	1	1	1	38	1	3	1	1	1	1	1	1	3	2	1	1	1	1	1	2	1	2	4	1	43	35	8	7	2	6	1	7	1	1	7	4	7
2	2	2	2	2	2	1	56	2	2	2	2	3	2	2	2	3	2	2	1	3	2	2	2	3	2	4	2	22	14	8	2	1	3	2	2	2	2	2	3	3
2	2	2	27	4	3	3	44	1	1	1	1	4	1	1	1	4	1	1	1	4	1	1	1	4	1	4	1	52	33	19	7	6	7	5	7	4	4	4	4	4
2	2	2	6	2	3	2	51	2	1	2	1	4	1	1	2	3	1	3	2	4	1	2	2	2	2	4	1	43	26	17	5	6	3	3	5	5	5	5	3	3
2	2	2	8	2	4	2	38	3	1	2	1	3	1	1	1	2	1	1	1	2	1	1	1	4	1	1	1	51	32	19	6	5	6	4	5	5	5	5	5	5
2	2	2	20	5	5	1	55	2	2	2	1	3	2	2	2	3	2	2	2	3	2	2	2	3	2	3	2	57	36	21	6	6	6	4	6	6	6	6	5	6
2	2	2	9	4	3	1	49	2	2	2	2	2	1	1	1	4	1	1	1	4	1	1	1	4	1	4	3	50	30	20	5	5	5	5	5	5	5	5	5	5
2	3	2	18	4	3	2	48	2	2	2	2	3	1	1	1	3	2	1	1	4	1	2	1	4	1	3	1	50	30	20	5	5	5	5	5	5	5	5	5	5
2	3	2	64	5	4	4	39	2	1	2	1	3	1	1	1	2	3	1	1	1	1	1	1	2	3	2	1	42	26	16	3	4	4	3	5	5	5	5	4	4
2	3	2	12	5	3	1	56	2	2	2	2	3	2	2	2	3	2	2	2	3	2	2	2	3	2	3	2	40	24	16	4	4	4	4	4	4	4	4	4	4
2	3	2	24	4	4	2	34	1	1	1	1	2	1	1	1	2	1	1	1	2	1	1	2	2	1	3	1	50	31	19	6	5	5	4	5	5	5	5	5	5
2	3	2	48	5	4	3	55	1	1	1	1	4	1	1	1	2	3	3	3	2	3	3	3	2	3	3	3	70	42	28	7	7	7	7	7	7	7	7	7	7
2	3	2	4	3	2	1	60	3	3	2	3	2	3	3	2	3	3	3	1	2	2	3	2	2	2	2	2	42	25	17	5	4	4	4	4	5	4	4	4	4
2	3	2	36	4	4	3	40	2	1	2	1	3	1	1	1	1	1	1	1	1	1	3	3	2	1	3	2	45	33	12	7	4	1	4	6	1	6	7	3	6
2	3	2	6	3	3	1	44	3	2	2	1	3	1	1	3	2	1	1	1	4	1	1	1	3	1	1	2	44	27	17	5	6	6	3	3	3	3	5	5	5
2	3	2	20	5	5	1	56	3	1	3	2	3	1	3	2	4	2	2	1	4	1	2	1	3	2	4	1	50	30	20	5	5	5	5	5	5	5	5	5	5
2	3	2	0	1	2	1	56	2	2	2	2	3	2	2	2	3	2	2	2	3	2	2	2	3	2	3	2	50	30	20	5	5	5	5	5	5	5	5	5	5
2	3	2	30	3	5	3	33	1	1	1	1	1	1	1	1	1	2	1	1	1	1	1	2	3	1	3	1	61	42	19	7	7	7	1	7	7	7	7	4	7
2	3	2	64	5	4	4	45	3	1	2	1	3	1	2	1	4	1	1	1	3	1	1	2	4	1	2	1	38	29	9	4	1	5	2	5	3	5	5	3	5
2	3	2	24	3	4	3	39	2	1	1	1	4	1	1	1	2	1	1	1	4	1	1	1	3	1	2	1	41	29	12	6	4	6	2	4	2	5	4	4	4
2	3	2	36	4	3	4	56	2	2	2	2	3	2	2	2	3	2	2	2	3	2	2	2	3	2	3	2	60	36	24	6	6	6	6	6	6	6	6	6	6
2	3	2	12	3	3	2	49	2	2	2	1	3	1	3	2	2	2	2	1	3	1	1	1	3	2	3	2	59	36	23	6	6	6	5	6	6	6	6	6	6
2	3	2	1	2	1	1	44	1	1	1	1	4	1	1	1	4	1	1	1	4	1	1	1	4	1	4	1	10	6	4	1	1	1	1	1	1	1	1	1	1
2	3	2	4	3	2	1	45	2	1	2	2	3	1	3	3	3	1	1	1	2	1	1	1	1	1	3	3	38	22	16	6	6	4	5	4	3	3	3	2	2
2	3	2	18	3	3	3	48	2	2	2	2	3	1	1	2	3	2	1	1	2	1	3	1	3	2	2	2	36	27	9	6	2	4	2	3	3	5	5	2	4
2	3	2	48	5	4	3	34	1	1	1	1	2	1	1	1	2	1	1	1	4	1	1	1	2	1	2	1	41	29	12	5	3	5	3	5	3	5	4	3	5
2	3	2	24	4	4	2	50	2	2	2	2	3	2	2	2	3	2	1	1	4	1	2	1	3	1	2	2	43	28	15	5	4	3	3	5	4	4	6	4	5
2	3	2	5	2	5	1	35	3	1	2	1	1	1	1	1	1	2	1	1	4	1	1	1	1	2	1	1	54	42	12	7	4	7	4	7	2	7	7	2	7
2	3	2	64	5	4	4	53	3	2	2	2	2	1	1	2	2	2	2	3	2	1	2	2	3	3	3	2	52	32	20	5	5	4	6	5	5	6	6	4	6
2	3	2	0	1	2	1	46	3	2	3	1	2	1	2	1	3	2	1	1	3	1	3	1	3	1	2	1	41	23	18	5	5	3	5	3	6	4	5	2	3
2	3	2	6	3	3	1	59	3	3	3	2	3	1	3	3	4	1	1	1	2	2	3	3	3	1	4	1	42	26	16	4	4	4	5	5	4	4	5	3	4
2	3	2	0	1	3	1	36	2	1	2	1	2	1	1	2	3	1	2	1	1	1	1	1	2	1	2	1	31	20	11	5	3	2	3	2	1	2	5	4	4
2	3	2	12	4	4	1	40	1	1	2	1	3	1	1	2	2	1	1	1	2	1	2	2	3	1	3	1	46	32	14	6	3	6	3	5	3	5	5	5	5
2	3	2	24	4	4	2	36	1	2	1	1	2	1	1	1	3	1	2	1	1	1	1	2	3	1	1	2	50	33	17	7	4	5	4	5	4	5	6	5	5
2	3	2	9	4	3	1	41	1	1	1	1	4	1	1	1	3	2	1	1	2	1	1	2	3	2	3	1	56	33	23	5	5	5	6	6	6	6	6	6	5
2	3	2	24	5	3	2	36	1	1	1	1	2	1	1	2	4	1	1	1	2	1	1	1	3	1	2	1	60	36	24	6	6	6	6	6	6	6	6	6	6
2	3	2	0	-2	-2	1	56	2	2	2	2	3	2	2	2	3	2	2	2	3	2	2	2	3	2	3	2	40	24	16	4	4	4	4	4	4	4	4	4	4
2	3	2	9	4	3	1	56	2	2	2	2	3	2	2	2	3	2	2	2	3	2	2	2	3	2	3	2	60	36	24	6	6	6	6	6	6	6	6	6	6
2	3	2	9	4	3	1	55	2	2	2	2	3	2	2	2	3	2	2	2	2	2	2	2	3	2	3	2	60	36	24	6	6	6	6	6	6	6	6	6	6
2	3	2	3	2	3	1	34	1	1	1	1	2	1	1	1	2	1	1	1	2	1	1	2	2	1	3	1	42	29	13	6	4	3	3	6	2	5	4	4	5
2	3	2	6	3	3	1	36	1	1	1	1	2	1	1	1	3	1	1	1	4	1	1	1	4	1	1	1	42	26	16	4	4	4	4	5	4	5	4	4	4
2	3	2	8	3	4	1	53	2	2	2	2	3	2	2	2	3	2	1	2	3	2	1	2	3	1	3	2	37	23	14	2	3	4	3	5	4	4	4	4	4
2	3	2	6	3	3	1	45	2	2	2	2	3	2	1	1	4	1	1	1	2	1	1	1	4	1	3	1	38	21	17	2	4	2	4	5	5	5	3	4	4
2	4	2	16	5	4	1	54	2	2	2	1	2	1	2	1	3	2	2	2	3	3	3	3	2	2	3	2	47	28	19	4	5	5	4	5	5	4	5	5	5
2	4	2	12	4	2	2	56	2	2	2	2	3	2	2	2	3	2	2	2	3	2	2	2	3	2	3	2	50	30	20	5	5	5	5	5	5	5	5	5	5
2	4	2	48	5	3	4	40	2	1	2	1	3	1	1	1	1	1	2	1	1	2	1	3	1	2	3	2	55	35	20	7	4	7	7	5	5	5	6	4	5
2	4	2	48	5	4	3	56	2	2	2	2	3	2	2	2	3	2	2	2	3	2	2	2	3	2	3	2	40	24	16	4	4	4	4	4	4	4	4	4	4
2	4	2	80	5	4	5	34	1	1	1	1	1	1	1	2	2	1	1	1	4	1	1	1	2	2	1	1	50	34	16	6	4	4	4	6	3	6	6	5	6
2	4	2	48	4	4	4	54	3	3	3	2	3	1	2	2	3	2	3	1	1	1	2	2	1	3	2	3	43	34	9	6	2	6	2	6	2	6	5	3	5
2	4	2	36	4	4	3	33	1	1	1	1	1	1	3	1	1	1	1	1	1	3	1	1	1	3	1	1	49	36	13	6	4	6	1	6	2	6	6	6	6
2	4	2	2	2	2	1	44	3	2	2	2	3	1	1	1	4	1	1	1	2	1	2	1	2	1	3	1	30	18	12	3	3	3	3	3	3	3	3	3	3
2	4	2	27	4	3	3	45	2	1	1	1	4	1	1	1	4	1	1	1	4	1	1	1	4	1	4	1	52	34	18	6	4	5	5	5	3	6	6	6	6
2	4	2	36	5	3	3	36	3	1	1	1	1	1	1	1	2	1	1	1	1	1	1	3	1	1	3	3	62	40	22	7	3	7	7	6	6	7	6	6	7
2	4	2	80	5	4	5	33	1	1	1	1	2	1	1	1	2	1	1	1	2	1	1	1	2	2	2	1	41	26	15	6	4	4	3	4	4	4	4	4	4
2	4	2	9	4	3	1	58	3	3	2	3	3	1	2	2	3	3	3	2	3	2	2	1	2	2	3	1	39	23	16	4	5	3	3	4	4	5	3	4	4
2	4	2	18	4	3	2	56	2	2	2	2	3	2	2	2	3	2	2	2	3	2	2	2	3	2	3	2	40	24	16	4	4	4	4	4	4	4	4	4	4
2	4	2	64	5	4	4	35	2	1	1	1	3	1	1	2	2	2	1	1	1	1	1	1	2	1	2	1	52	30	22	5	6	5	6	5	5	5	5	5	5
2	4	2	9	2	3	3	55	3	2	2	2	2	2	2	2	3	2	2	2	4	1	1	2	3	2	3	2	44	28	16	5	5	5	3	5	4	4	5	4	4
2	4	2	8	2	4	2	45	2	1	2	1	3	1	1	2	3	2	1	1	2	2	1	3	2	2	2	2	42	23	19	5	6	4	4	3	5	4	3	4	4
2	4	2	0	1	1	1	49	2	2	3	3	3	1	2	2	3	1	1	1	4	1	1	1	2	2	3	1	39	20	19	5	6	1	4	4	5	4	3	4	3
2	4	2	0	1	1	1	56	2	2	2	2	3	2	2	2	3	2	2	2	3	2	2	2	3	2	3	2	49	37	12	6	5	6	3	6	2	6	7	2	6
2	4	2	12	2	4	3	41	1	1	1	1	4	1	1	1	4	1	1	1	4	1	1	1	3	1	2	2	43	30	13	7	1	7	4	4	4	4	4	4	4
2	4	2	10	3	5	1	43	2	1	1	1	3	1	2	2	3	2	1	1	2	1	1	2	2	1	3	2	58	36	22	6	6	6	6	6	6	6	6	4	6
2	4	2	2	3	1	1	40	2	2	2	2	3	1	1	2	2	1	1	1	1	1	1	2	3	1	2	1	55	36	19	6	5	6	4	6	6	6	6	4	6
2	2	1	24	4	4	2	25	1	1	1	1	1	1	1	1	1	1	1	1	1	1	1	1	1	1	1	1	51	35	16	5	2	6	4	6	6	6	6	4	6
2	1	1	12	3	3	2	36	2	1	1	1	3	1	2	2	2	1	1	1	2	1	1	1	2	1	1	2	52	35	17	6	3	5	3	6	5	6	6	6	6
2	1	1	18	4	3	2	26	2	1	1	1	1	1	1	1	1	1	1	1	1	1	1	1	1	1	1	1	51	38	13	7	3	7	4	6	3	6	6	3	6
2	1	1	18	4	3	2	31	2	1	2	1	1	1	1	1	1	2	1	1	1	1	1	1	2	1	2	1	46	31	15	4	5	6	3	6	3	5	5	4	5
2	1	1	36	4	3	4	41	1	1	3	1	3	1	3	3	3	1	1	1	3	1	2	1	1	1	1	1	52	32	20	7	5	5	5	5	5	5	5	5	5
2	1	1	36	4	3	4	29	1	1	1	1	2	1	1	1	1	1	1	1	1	1	1	1	1	2	2	1	60	36	24	6	6	6	6	6	6	6	6	6	6
2	2	1	9	4	3	1	56	2	2	2	2	3	2	2	2	3	2	2	2	3	2	2	2	3	2	3	2	40	24	16	4	4	4	4	4	4	4	4	4	4
2	2	1	24	5	3	2	25	1	1	1	1	1	1	1	1	1	1	1	1	1	1	1	1	1	1	1	1	68	42	26	7	7	7	7	7	5	7	7	7	7
2	2	1	16	5	2	2	41	2	1	2	1	2	1	2	2	2	2	2	2	2	1	1	2	2	1	2	1	46	30	16	5	5	5	3	5	4	5	5	4	5
2	2	1	2	2	2	1	44	2	1	2	1	3	1	3	2	3	1	1	2	3	1	1	1	2	1	3	1	48	30	18	6	7	4	5	3	2	6	6	4	5
2	2	1	9	4	3	1	34	1	1	1	1	1	1	2	1	3	2	2	1	1	1	1	1	1	2	2	1	38	24	14	4	2	4	3	5	5	4	4	4	3
2	2	1	12	4	4	1	40	2	1	2	1	2	1	1	2	4	1	2	1	1	1	1	1	2	2	2	2	39	26	13	5	4	5	1	4	4	4	4	4	4
2	2	1	3	2	3	1	56	2	2	2	2	3	2	2	2	3	2	2	2	3	2	2	2	3	2	3	2	43	27	16	7	4	4	4	4	4	4	4	4	4
2	2	1	48	5	4	3	45	1	1	1	1	3	1	2	2	3	2	2	1	1	2	1	2	3	2	3	2	60	36	24	6	6	6	6	6	6	6	6	6	6
2	2	1	40	3	4	5	34	3	1	1	1	1	1	1	1	1	1	1	1	1	1	1	1	3	1	4	1	57	42	15	7	1	7	6	7	1	7	7	7	7
2	2	1	16	5	2	2	49	3	2	2	2	3	1	2	2	2	1	2	1	3	2	1	2	2	3	2	1	56	35	21	7	5	7	6	6	5	5	5	5	5
2	2	1	27	4	3	3	41	2	2	2	1	4	1	2	1	3	1	2	1	1	1	1	2	2	2	1	1	46	37	9	7	2	5	2	7	3	6	6	2	6
2	2	1	9	4	3	1	66	3	2	3	3	3	1	2	3	2	3	3	3	3	2	3	4	3	2	2	3	42	24	18	2	5	3	3	4	5	5	5	5	5
2	2	1	12	4	4	1	48	3	1	1	1	2	1	2	3	3	2	1	1	3	1	2	1	4	1	4	1	39	27	12	4	3	5	3	5	3	5	5	3	3
2	2	1	12	3	3	2	35	3	1	1	1	2	1	1	2	2	1	1	1	2	1	1	1	2	1	2	1	43	26	17	5	4	2	3	4	5	4	5	5	6
2	2	1	9	2	3	3	38	2	2	2	2	2	1	1	1	1	2	1	1	1	1	1	1	4	1	2	1	67	42	25	7	6	7	6	7	7	7	7	6	7
2	2	1	32	3	4	4	40	2	1	2	1	3	1	2	1	2	2	2	1	2	1	2	1	3	1	1	1	47	30	17	5	5	5	4	5	4	5	5	4	5
2	2	1	24	3	4	3	36	1	1	1	1	2	2	2	2	3	1	1	1	1	2	2	1	1	2	1	1	46	30	16	4	5	5	5	6	3	5	4	3	6
2	2	1	24	5	3	2	44	2	1	2	1	2	1	2	2	2	2	2	2	2	2	1	1	3	2	2	1	45	36	9	6	2	6	2	6	2	6	6	3	6
2	2	1	8	3	4	1	45	1	1	2	1	2	1	3	3	2	1	1	1	2	1	4	2	3	1	3	1	50	34	16	5	4	6	3	6	7	6	6	2	5
2	2	1	36	4	4	3	59	3	3	3	3	4	1	1	2	2	3	1	3	1	1	2	1	3	2	4	4	52	42	10	7	3	7	4	7	2	7	7	1	7
2	2	1	12	3	3	2	38	2	3	3	1	3	1	1	1	3	2	1	1	1	1	1	1	1	1	1	1	44	34	10	7	2	6	3	4	1	6	6	4	5
2	2	1	36	4	3	4	41	1	1	1	1	4	1	1	1	3	1	1	1	4	1	1	1	4	1	3	1	37	23	14	4	3	3	3	4	4	4	4	4	4
2	2	1	48	5	3	4	40	1	1	1	1	2	1	3	1	2	1	1	1	2	1	1	2	3	2	3	2	44	28	16	5	5	5	5	5	3	3	5	3	5
2	2	1	2	2	2	1	60	2	2	2	1	3	2	2	2	2	3	3	3	2	3	3	3	2	3	2	3	50	30	20	5	5	5	5	5	5	5	5	5	5
2	2	1	12	3	3	2	39	2	1	2	1	2	1	2	2	3	1	1	1	2	1	1	1	2	1	3	1	42	27	15	4	5	4	3	5	4	5	5	3	4
2	2	1	24	5	3	2	60	1	2	2	2	4	2	4	3	2	2	2	2	2	2	3	2	2	2	4	3	41	30	11	5	4	5	3	3	2	5	6	2	6
2	2	1	24	3	4	3	49	3	1	3	1	2	1	1	1	2	1	1	1	2	1	3	3	2	3	4	3	36	28	8	6	3	2	1	6	2	6	2	2	6
2	3	1	24	4	4	2	33	1	1	1	1	1	1	1	2	2	1	1	1	1	1	1	2	1	3	2	1	48	35	13	7	5	7	4	6	2	5	5	2	5
2	3	1	6	3	3	1	33	2	1	1	1	1	1	1	1	1	1	1	1	4	1	1	1	1	1	2	2	55	34	21	7	5	3	7	5	4	7	7	5	5
2	3	1	27	4	3	3	43	2	2	2	2	2	1	2	2	3	2	1	1	1	1	1	2	2	2	2	1	44	30	14	5	5	5	3	5	3	5	5	3	5
2	1	2	6	3	3	1	45	4	4	2	1	2	3	1	1	1	1	1	1	1	1	1	1	3	3	3	1	56	32	24	7	7	6	6	7	7	4	4	4	4
2	2	2	3	2	3	1	46	2	1	1	1	3	1	1	2	1	2	1	1	1	1	3	2	4	4	3	2	60	36	24	6	6	6	6	6	6	6	6	6	6
2	2	2	0	1	5	1	31	1	1	1	1	1	1	1	1	1	2	1	1	1	2	2	2	1	2	1	1	48	34	14	6	2	6	3	6	5	5	5	4	6
2	2	2	9	4	3	1	48	1	1	1	1	4	1	2	1	4	1	1	2	4	1	2	1	4	2	3	1	46	30	16	5	5	5	3	5	3	5	5	5	5
2	2	2	64	5	4	4	58	3	3	3	3	2	3	3	3	2	3	3	3	2	1	1	3	1	2	1	1	70	42	28	7	7	7	7	7	7	7	7	7	7
2	2	2	10	3	5	1	38	2	1	1	1	2	1	1	2	2	1	1	1	1	2	1	1	3	1	4	1	44	27	17	7	5	4	4	4	4	4	4	4	4
2	2	2	24	4	4	2	41	2	1	2	1	3	1	1	2	2	1	1	1	2	1	1	2	3	2	3	1	37	25	12	4	3	4	3	4	2	4	5	4	4
2	2	2	6	3	3	1	34	1	1	1	2	2	1	1	1	2	1	1	1	2	1	1	1	2	2	2	1	38	28	10	4	3	4	2	5	2	5	5	3	5
2	2	2	3	2	3	1	33	1	1	1	1	3	1	1	2	3	1	1	1	1	1	1	1	1	1	2	1	50	31	19	7	5	5	4	4	5	5	5	5	5
2	2	2	6	3	3	1	39	2	1	1	1	2	1	2	2	2	1	2	1	2	1	1	1	2	1	3	2	42	30	12	5	2	5	5	5	3	5	5	2	5
2	2	2	8	3	4	1	35	1	1	1	1	3	1	1	1	2	1	1	1	2	1	1	1	3	2	2	1	40	24	16	5	6	2	2	6	5	3	4	3	4
2	2	2	12	3	3	2	45	1	1	1	1	2	1	1	3	3	2	2	1	2	1	1	2	2	2	4	3	48	29	19	6	5	4	4	5	5	5	5	5	4
2	2	2	1	2	1	1	46	1	1	2	1	3	1	1	2	3	1	1	1	4	1	1	2	4	2	3	2	48	28	20	5	5	5	5	4	5	4	5	5	5
2	2	2	20	3	5	2	43	2	1	2	1	2	1	2	2	3	2	2	1	1	1	1	1	2	2	4	1	43	25	18	4	5	4	5	5	4	4	4	4	4
2	2	2	3	2	3	1	60	2	2	3	3	2	3	3	3	3	2	2	1	3	2	2	2	3	2	3	2	46	28	18	4	4	4	4	5	5	5	5	5	5
2	3	2	3	2	3	1	26	1	1	1	1	2	1	1	1	1	1	1	1	1	1	1	1	1	1	1	1	39	26	13	6	3	6	4	5	2	2	3	4	4
2	3	2	0	1	1	1	44	1	1	1	1	4	1	1	1	4	1	1	1	4	1	1	1	4	1	4	1	40	24	16	4	4	4	4	4	4	4	4	4	4
2	3	2	24	3	3	4	33	1	1	1	1	2	1	1	1	2	1	1	1	2	1	1	1	3	1	2	1	49	35	14	6	5	6	3	5	3	6	6	3	6
2	3	2	24	4	4	2	38	1	1	1	1	4	2	1	1	3	1	1	1	3	1	1	1	2	1	2	1	42	27	15	4	5	5	3	4	3	4	5	4	5
2	2	1	15	4	5	1	68	3	3	3	4	4	2	3	3	1	1	1	1	3	3	3	3	3	3	4	3	60	35	25	7	5	1	7	7	7	7	7	6	6
2	1	1	80	5	5	4	36	2	1	2	1	2	1	1	1	3	2	1	1	1	1	1	2	2	2	1	1	48	32	16	6	4	7	4	7	4	4	4	4	4
2	1	1	36	5	3	3	46	4	3	3	1	2	2	1	1	2	1	3	2	1	1	2	3	1	2	1	1	36	23	13	2	2	5	4	5	2	1	5	5	5
2	2	1	12	5	3	1	35	2	1	2	1	2	1	1	2	1	1	1	1	2	1	1	1	3	1	2	1	43	28	15	7	3	4	4	4	4	4	5	4	4
2	2	1	0	1	3	1	39	1	1	1	1	2	1	2	1	2	1	1	1	2	1	1	2	3	2	3	2	45	34	11	5	1	7	2	7	4	5	6	4	4
2	2	1	9	4	3	1	63	3	2	3	2	2	2	2	2	2	2	3	2	3	3	2	3	3	3	3	3	41	26	15	5	4	4	4	4	4	4	5	3	4
2	2	1	64	5	4	4	43	2	1	1	1	2	1	3	3	3	1	1	1	1	2	1	3	2	2	2	1	48	34	14	7	4	6	2	5	4	6	4	4	6
2	2	1	12	3	3	2	39	1	1	1	2	3	1	2	2	3	1	1	1	2	1	2	1	1	1	1	3	25	13	12	2	2	2	3	2	3	2	2	4	3
2	2	1	0	1	2	1	36	1	1	1	1	3	1	1	1	3	1	1	1	2	1	1	3	2	1	2	1	39	25	14	6	3	3	3	4	4	4	4	4	4
2	2	1	64	5	4	4	40	2	2	2	2	3	1	1	1	2	2	1	1	1	1	1	2	1	2	2	2	50	30	20	5	5	5	5	5	5	5	5	5	5
2	2	1	12	5	3	1	46	2	1	2	1	3	1	1	2	3	2	1	1	2	1	2	2	2	2	3	3	48	30	18	5	4	5	5	5	4	5	5	5	5
2	2	1	15	4	5	1	40	3	4	2	1	1	1	1	3	1	1	1	1	1	1	1	1	2	1	3	2	64	42	22	7	7	7	2	7	6	7	7	7	7
2	2	1	12	3	3	2	33	2	1	1	1	1	1	2	4	2	1	1	1	1	1	1	1	1	1	1	1	25	21	4	1	1	1	1	4	1	4	7	1	4
2	2	1	8	3	2	2	39	1	1	2	1	4	1	1	2	4	1	1	1	2	1	1	1	1	1	2	2	44	26	18	4	4	4	4	4	5	5	5	5	4
2	2	1	18	4	3	2	49	3	3	3	1	4	1	1	3	3	1	2	1	2	1	1	2	2	2	2	1	56	35	21	6	5	6	6	6	5	6	6	5	5
2	2	1	20	5	5	1	53	2	2	2	2	2	1	2	2	3	2	2	2	3	1	2	2	3	2	3	2	60	41	19	7	1	6	4	7	7	7	7	7	7
2	2	1	48	5	3	4	44	1	1	1	1	4	1	1	1	4	1	1	1	4	1	1	1	4	1	4	1	50	30	20	5	5	5	5	5	5	5	5	5	5
2	2	1	6	4	2	1	41	1	1	1	1	4	1	1	1	4	1	1	1	4	1	1	1	4	1	2	1	37	23	14	3	3	3	3	5	4	4	4	4	4
2	2	1	4	2	2	2	48	3	1	2	2	3	3	3	3	3	2	1	1	1	1	1	2	1	1	2	2	40	24	16	4	4	4	4	4	4	4	4	4	4
2	2	1	3	2	3	1	36	1	1	1	1	1	1	1	1	4	1	1	1	4	1	1	1	4	1	1	1	43	26	17	4	4	4	3	3	5	5	5	5	5
2	2	1	3	2	3	1	39	2	2	2	2	2	1	1	2	2	1	1	1	2	1	1	1	2	1	2	2	40	24	16	4	4	4	4	4	4	4	4	4	4
2	2	1	6	3	3	1	55	2	1	2	1	4	2	3	3	1	2	1	1	3	3	1	1	4	3	4	2	40	28	12	5	4	3	3	5	4	5	5	1	5
2	2	1	48	5	3	4	36	1	1	1	1	4	1	1	1	4	1	1	1	4	1	1	1	1	1	1	1	64	42	22	7	1	7	7	7	7	7	7	7	7
2	2	1	9	4	3	1	39	2	1	1	1	3	1	1	1	3	1	1	1	3	1	1	1	3	1	3	1	49	30	19	5	5	5	5	5	4	5	5	5	5
2	2	1	8	3	4	1	36	1	1	1	1	2	1	1	2	1	1	1	1	2	2	2	1	2	3	2	1	43	35	8	6	2	6	3	6	2	6	6	1	5
2	2	1	16	5	2	2	29	1	1	1	1	4	1	1	1	1	1	1	1	1	1	1	1	1	1	1	1	34	27	7	7	1	1	1	7	1	4	4	4	4
2	2	1	18	4	2	3	56	2	2	2	2	3	2	2	2	3	2	2	2	3	2	2	2	3	2	3	2	35	27	8	6	1	1	5	5	1	5	5	1	5
2	2	1	4	3	2	1	44	1	1	1	1	4	1	1	1	4	1	1	1	4	1	1	1	4	1	4	1	40	24	16	4	4	4	4	4	4	4	4	4	4
2	2	1	0	1	1	1	45	2	2	2	1	3	1	1	1	4	2	1	1	2	1	1	2	3	2	2	2	39	25	14	4	3	4	5	4	2	5	4	4	4
2	2	1	24	5	3	2	41	1	1	1	1	4	1	2	2	3	1	2	1	2	1	1	2	2	2	2	1	40	28	12	5	3	5	3	5	3	5	5	3	3
2	2	1	48	5	3	4	70	4	4	4	1	4	1	1	4	4	1	4	1	1	1	1	4	4	4	4	4	30	16	14	1	1	1	7	7	5	1	1	1	5
2	2	1	6	3	3	1	53	2	3	1	1	2	2	3	2	2	1	2	2	3	2	2	3	4	2	2	1	46	28	18	5	4	5	5	4	5	4	5	4	5
2	2	1	12	5	3	1	54	2	2	2	1	3	2	3	1	3	2	2	1	3	1	3	2	3	3	2	2	40	24	16	4	4	4	4	4	4	4	4	4	4
2	2	1	4	2	4	1	69	3	3	3	3	2	3	3	3	2	3	3	3	2	3	3	3	2	3	2	3	40	24	16	4	4	4	4	4	4	4	4	4	4
2	2	1	32	5	4	2	54	2	1	2	1	3	1	3	3	3	2	2	2	2	2	2	1	4	1	4	2	44	23	21	4	6	3	4	4	5	4	4	6	4
2	3	1	12	3	3	2	41	1	1	1	1	4	1	1	1	3	2	1	1	4	1	1	2	2	2	1	2	48	32	16	5	4	5	4	6	5	6	6	3	4
2	3	1	24	3	4	3	49	1	1	1	2	2	1	3	2	2	1	1	1	4	1	4	1	4	2	4	1	41	20	21	3	6	3	5	5	3	3	3	7	3
2	3	1	2	2	2	1	44	1	1	1	1	4	1	1	1	4	1	1	1	4	1	1	1	4	1	4	1	42	27	15	5	4	5	5	3	4	6	4	2	4
2	1	2	48	5	3	4	33	1	1	1	1	2	1	1	1	3	1	1	1	1	1	1	1	3	1	1	2	46	30	16	5	5	5	3	6	3	4	5	5	5
2	1	2	12	2	4	3	34	2	1	1	1	2	1	1	1	2	1	1	1	1	1	2	2	2	1	2	1	53	37	16	6	6	7	3	6	2	6	6	5	6
2	1	2	30	3	5	3	33	1	1	1	1	2	1	1	1	1	1	1	1	4	1	1	1	3	1	1	1	43	36	7	5	3	6	1	6	2	7	6	1	6
2	1	2	6	4	2	1	59	2	2	2	1	4	2	2	3	3	2	2	2	3	2	2	2	3	2	4	2	40	24	16	4	4	4	4	4	4	4	4	4	4
2	1	2	48	5	3	4	44	1	1	1	1	4	1	1	1	4	1	1	1	4	1	1	1	4	1	4	1	42	26	16	6	4	4	4	4	4	4	4	4	4
2	2	2	3	2	3	1	51	2	3	2	1	3	1	3	2	3	2	1	1	2	2	2	1	4	2	3	1	50	30	20	5	5	5	5	5	5	5	5	5	5
2	2	2	3	2	3	1	49	2	2	3	2	3	1	2	3	2	2	1	1	2	2	1	2	3	1	3	1	51	32	19	6	6	6	5	4	5	5	6	3	5
2	2	2	12	4	2	2	56	2	2	2	2	3	2	2	2	3	2	2	2	3	2	2	2	3	2	3	2	47	27	20	4	5	3	5	5	5	5	5	5	5
2	2	2	9	4	3	1	65	3	2	2	1	4	1	3	4	3	3	3	1	3	3	4	4	2	3	2	1	38	30	8	6	2	2	1	6	1	6	6	4	4
2	2	2	36	4	4	3	36	2	1	2	2	1	1	1	3	1	1	2	2	1	1	1	1	2	1	2	1	70	42	28	7	7	7	7	7	7	7	7	7	7
2	2	2	3	2	3	1	56	2	2	2	2	3	2	2	2	3	2	2	2	3	2	2	2	3	2	3	2	40	24	16	4	3	4	5	4	5	4	3	3	5
2	2	2	6	3	3	1	39	1	1	1	1	2	1	1	1	2	1	1	1	4	1	1	2	4	1	3	1	48	31	17	7	6	4	4	7	3	5	4	4	4
2	2	2	10	3	5	1	40	2	1	1	1	3	1	1	1	3	1	1	1	3	1	1	1	3	1	4	1	47	42	5	7	1	7	2	7	1	7	7	1	7
2	2	2	9	4	3	1	44	1	1	1	1	2	1	2	2	2	2	1	1	4	2	1	3	3	2	2	1	41	29	12	5	3	6	3	6	3	3	4	3	5
2	2	2	16	3	4	2	34	1	1	2	1	2	1	1	2	3	1	1	1	1	1	1	2	1	1	1	2	41	33	8	2	2	6	2	7	1	6	6	3	6
2	2	2	9	4	3	1	45	2	2	2	1	2	1	2	1	2	1	1	1	2	2	2	2	3	3	2	2	46	30	16	6	4	6	4	6	4	4	4	4	4
2	2	2	24	5	3	2	36	2	1	1	1	2	1	1	1	3	1	1	1	2	1	1	2	3	1	2	1	43	31	12	6	3	5	3	5	3	5	5	3	5
2	2	2	36	5	3	3	39	1	2	1	1	3	1	1	1	2	1	1	1	2	1	1	2	3	2	3	1	49	34	15	7	6	6	3	6	3	5	5	3	5
2	2	2	24	5	3	2	49	2	1	2	2	2	2	2	2	3	2	2	1	3	2	2	2	2	2	2	1	44	32	12	6	2	5	2	6	4	6	5	4	4
2	2	2	18	3	3	3	33	1	1	1	1	2	1	1	1	2	1	1	1	2	1	1	2	2	2	1	1	46	30	16	5	5	5	5	5	3	5	5	3	5
2	2	2	6	3	3	1	34	1	1	1	1	2	1	1	1	4	1	1	1	2	1	1	1	2	1	2	1	46	28	18	4	5	5	3	5	5	5	4	5	5
2	2	2	18	4	3	2	44	1	1	1	1	4	1	2	3	2	1	1	1	1	1	1	1	4	2	4	2	42	24	18	5	6	4	3	3	5	4	4	4	4
2	2	2	2	2	2	1	45	2	1	1	1	3	1	1	3	2	2	2	2	2	2	1	2	3	2	2	1	52	35	17	6	5	6	6	6	3	6	6	3	5
2	2	2	9	4	3	1	30	1	1	1	1	2	1	1	1	2	1	1	1	1	1	2	1	2	1	1	1	45	34	11	6	5	7	2	5	2	3	6	2	7
2	2	2	4	3	2	1	38	1	1	1	1	3	1	1	1	2	2	1	1	4	1	1	1	3	1	2	1	40	24	16	4	4	4	4	4	4	4	4	4	4
2	2	2	20	5	5	1	34	1	1	1	1	2	1	2	1	2	1	1	1	1	1	2	2	2	1	2	1	46	39	7	7	2	7	1	7	3	7	7	1	4
2	2	2	12	4	2	2	56	2	2	2	2	3	2	2	2	3	2	2	2	3	2	2	2	3	2	3	2	70	42	28	7	7	7	7	7	7	7	7	7	7
2	2	2	16	3	4	2	45	1	1	2	1	4	1	2	3	2	1	2	1	3	1	1	3	2	1	3	1	31	18	13	4	2	4	6	4	2	2	2	3	2
2	2	2	6	3	3	1	46	3	1	1	1	2	1	1	2	4	1	1	1	4	1	1	3	4	1	3	1	44	31	13	6	1	6	2	4	5	5	5	5	5
2	2	2	9	4	3	1	46	2	2	3	1	3	1	1	4	3	1	1	1	1	1	2	2	2	2	2	2	45	28	17	5	5	5	3	5	6	4	5	3	4
2	2	2	24	5	3	2	30	1	1	1	1	2	1	1	1	3	1	1	1	1	1	1	1	1	2	1	1	53	42	11	7	4	7	2	7	3	7	7	2	7
2	2	2	4	3	2	1	38	1	1	1	1	2	1	1	1	1	2	1	1	1	2	1	3	4	2	1	2	58	38	20	6	3	7	5	6	7	6	7	5	6
2	2	2	4	2	2	2	50	1	1	2	1	4	1	1	2	3	2	2	2	2	1	2	2	4	2	4	1	48	28	20	5	5	4	6	5	5	5	5	4	4
2	2	2	16	5	4	1	39	2	1	1	1	2	1	1	1	2	2	1	1	2	1	1	2	2	2	3	2	45	27	18	4	5	4	2	5	5	4	5	6	5
2	2	2	8	5	2	1	44	1	2	2	1	3	1	2	2	2	1	1	1	4	1	1	1	4	1	3	1	57	35	22	6	4	5	6	6	6	6	6	6	6
2	2	2	12	5	3	1	49	2	2	2	2	2	1	1	1	3	2	1	1	4	1	2	2	3	2	3	2	40	26	14	4	3	5	3	5	4	4	4	4	4
2	2	2	36	4	4	3	44	1	1	2	1	3	1	1	1	3	1	1	1	4	1	1	3	4	1	2	2	44	28	16	4	3	4	3	5	5	5	5	5	5
2	2	2	9	4	3	1	51	2	2	2	1	3	2	1	1	3	2	2	2	3	2	2	1	3	2	3	2	45	30	15	5	3	5	2	5	5	5	5	5	5
2	2	2	3	2	3	1	45	2	2	2	1	2	2	2	2	2	2	2	1	2	1	1	2	3	1	3	1	48	29	19	5	6	5	5	6	3	5	3	5	5
2	2	2	16	5	4	1	38	1	1	1	1	3	1	1	1	2	2	1	1	2	1	1	2	3	2	2	1	53	32	21	6	6	5	5	6	5	5	5	5	5
2	2	2	32	5	4	2	48	2	1	2	1	3	1	1	2	3	1	2	1	3	1	2	1	3	2	4	2	46	29	17	5	4	5	5	4	4	5	5	4	5
2	2	2	16	5	2	2	55	2	2	2	1	3	2	2	2	3	2	2	2	3	2	2	2	3	2	3	2	51	31	20	6	5	5	5	5	5	5	5	5	5
2	2	2	45	4	5	3	48	2	2	2	2	2	2	2	2	2	2	2	2	3	2	1	1	3	1	2	1	44	30	14	7	4	5	3	2	4	6	5	3	5
2	2	2	24	4	2	4	40	1	1	1	1	2	1	1	2	3	1	1	1	1	1	2	4	2	2	2	2	48	36	12	7	4	7	2	5	3	7	5	3	5
2	2	2	18	4	3	2	49	2	1	1	1	4	1	1	2	3	2	2	2	3	1	2	2	3	1	3	2	45	29	16	6	4	6	4	5	4	4	4	4	4
2	2	2	16	5	4	1	45	2	1	2	2	2	1	1	2	3	1	1	1	4	1	1	1	4	2	3	1	51	33	18	6	6	6	4	7	4	4	6	4	4
2	2	2	12	2	4	3	44	3	2	1	1	1	1	2	1	3	1	1	1	4	1	1	2	3	2	3	1	52	36	16	6	4	6	5	6	3	6	6	4	6
2	2	2	2	2	2	1	60	3	2	3	3	3	2	2	2	3	2	2	2	3	2	2	2	3	2	3	2	45	26	19	5	4	1	5	5	5	5	5	5	5
2	2	2	48	5	4	3	31	2	1	1	1	1	1	1	1	4	1	1	1	1	1	1	1	2	1	1	1	57	34	23	6	6	6	6	6	5	5	5	6	6
2	2	2	6	3	3	1	48	1	1	2	1	4	1	2	3	4	1	1	2	2	1	2	1	4	1	3	1	46	28	18	4	3	5	3	5	6	4	4	6	6
2	2	2	4	2	2	2	60	2	2	2	3	3	2	2	2	2	2	3	3	3	2	3	2	3	2	3	2	47	27	20	5	5	5	6	5	5	4	4	4	4
2	2	2	2	2	2	1	46	4	2	2	1	3	1	1	1	2	1	1	1	2	1	3	2	3	1	4	1	57	37	20	7	6	7	1	5	7	6	6	6	6
2	2	2	12	4	4	1	53	2	2	2	2	2	2	3	2	2	2	2	1	3	2	3	2	2	2	2	2	60	36	24	5	7	7	4	6	7	6	6	6	6
2	2	2	18	4	3	2	74	3	3	3	3	2	3	3	3	1	4	4	4	1	4	4	4	1	4	1	4	70	42	28	7	7	7	7	7	7	7	7	7	7
2	2	2	5	2	5	1	48	2	2	2	1	4	1	1	1	4	1	1	1	1	1	2	3	4	2	3	1	61	37	24	7	7	6	6	5	6	6	6	5	7
2	3	2	12	4	4	1	60	2	1	2	2	3	2	3	3	3	3	2	2	3	2	3	2	2	3	3	2	48	28	20	5	5	5	5	5	6	4	4	4	5
2	3	2	9	2	3	3	39	2	1	1	1	2	1	1	1	3	1	1	1	2	1	1	2	4	2	2	1	44	28	16	5	5	5	5	5	3	5	3	3	5
2	3	2	6	3	3	1	46	2	2	1	1	3	1	1	2	2	2	2	2	2	1	1	2	3	2	3	2	40	30	10	6	2	6	3	5	3	3	5	2	5
2	3	2	18	4	3	2	53	2	3	3	3	2	1	1	2	3	1	2	2	4	1	2	1	2	2	4	1	49	28	21	4	4	5	6	5	7	5	5	4	4
2	3	2	2	2	2	1	40	1	1	2	1	3	1	1	2	3	1	1	1	2	1	2	2	1	2	3	1	47	27	20	4	5	4	5	5	6	5	4	4	5
2	3	2	48	5	4	3	45	2	1	2	2	2	1	2	2	3	2	2	1	2	1	1	1	2	2	4	1	37	26	11	5	3	4	2	5	2	4	4	4	4
2	4	2	64	5	4	4	33	2	1	1	1	1	1	1	1	2	1	1	1	1	1	1	1	4	2	1	1	51	37	14	7	1	7	5	6	6	6	6	2	5
2	4	2	0	1	3	1	45	3	2	1	1	3	1	1	2	2	1	1	2	4	1	1	1	4	1	3	1	42	24	18	4	5	5	3	4	5	3	4	5	4
